# Supplementary material for: Relevance of TNBS-Colitis in Rats: A Methodological Study with Endoscopic, Histologic and Transcriptomic Characterization and Correlation to IBD
Source: PLoS One. 2013 Jan 31;8(1):e54543. doi: 10.1371/journal.pone.0054543 (PMC3561356; doi:10.1371/journal.pone.0054543)
Supplement: Table S1 — Genes identified with Ensemble IDs, Gene Symbols and Gene Names and their respective cluster assignments (1–13) with involved GO-BPs and KEGG Pathways. (XLS) [file pone.0054543.s003.xls]

## Sheet: Sheet1
Ensembl ID	Gene Symbol	Gene Name	GO-BP	KEGG Pathway	Gene Cluster
ENSRNOG00000000036	Klhdc8a	kelch domain containing 8A			1
ENSRNOG00000000047	Cd82	Cd82 molecule		rno04115:p53 signaling pathway	1
ENSRNOG00000000082	Hltf	helicase-like transcription factor	regulation of transcription from RNA polymerase II promoter		1
ENSRNOG00000000096	NHRF3_RAT	PDZ domain containing 1	cholesterol transport; intracellular transport		1
ENSRNOG00000000172	Sqrdl	sulfide quinone reductase-like (yeast)	oxidation reduction		1
ENSRNOG00000000185	Mpst	mercaptopyruvate sulfurtransferase	sulfate transport	rno00270:Cysteine and methionine metabolism	1
ENSRNOG00000000219	Ano10	anoctamin 10			1
ENSRNOG00000000420	Rdbp	RD RNA-binding protein			1
ENSRNOG00000000442	Notch4	Notch homolog 4 (Drosophila)	Notch signaling pathway; cell differentiation; embryonic development; mammary gland development; morphogenesis of a branching structure; multicellular organismal development; patterning of blood vessels; regulation of developmental process	rno04320:Dorso-ventral axis formation; rno04330:Notch signaling pathway	1
ENSRNOG00000000466	Hsd17b8	hydroxysteroid (17-beta) dehydrogenase 8	androgen metabolic process; cellular metabolic process; fatty acid biosynthetic process; metabolic process; oxidation reduction	rno00140:Steroid hormone biosynthesis	1
ENSRNOG00000000504	Fance	Fanconi anemia, complementation group E			1
ENSRNOG00000000613	Tfam	transcription factor A, mitochondrial	mitochondrial DNA replication; regulation of transcription	rno05016:Huntington's disease	1
ENSRNOG00000000634	RGD1306739	similar to RIKEN cDNA 1700040L02			1
ENSRNOG00000000664	Tpst2	tyrosylprotein sulfotransferase 2			1
ENSRNOG00000000729	Tmlhe	trimethyllysine hydroxylase, epsilon	oxidation reduction	rno00310:Lysine degradation	1
ENSRNOG00000000781	Rnf39	ring finger protein 39	regulation of neuronal synaptic plasticity		1
ENSRNOG00000000795	RT1-N3	RT1 class Ib, locus N3	antigen processing and presentation; immune response	rno04144:Endocytosis; rno04514:Cell adhesion molecules (CAMs); rno04612:Antigen processing and presentation; rno04940:Type I diabetes mellitus; rno05320:Autoimmune thyroid disease; rno05330:Allograft rejection; rno05332:Graft-versus-host disease; rno05416:Viral myocarditis	1
ENSRNOG00000000800	Man1a1	mannosidase, alpha, class 1A, member 1		rno00510:N-Glycan biosynthesis	1
ENSRNOG00000000804	Mrps18b	mitochondrial ribosomal protein S18B	translation		1
ENSRNOG00000000812	RGD1302996	hypothetical protein MGC:15854			1
ENSRNOG00000001032	Q6AYE1_RAT	similar to CG14980-PB			1
ENSRNOG00000001082	Abcb9	ATP-binding cassette, subfamily B (MDR/TAP), member 9	protein transport; transmembrane transport; transport	rno02010:ABC transporters; rno04142:Lysosome	1
ENSRNOG00000001183	Hnf1a	HNF1 homeobox A	SMAD protein signal transduction; bile acid and bile salt transport; bile acid biosynthetic process; blastocyst development; bone resorption; cholesterol metabolic process; chromatin remodeling; embryonic limb morphogenesis; endocrine pancreas development; fatty acid biosynthetic process; fatty acid transport; glucose homeostasis; heme biosynthetic process; liver development; negative regulation …	rno04950:Maturity onset diabetes of the young	1
ENSRNOG00000001214	Pfkl	phosphofructokinase, liver	fructose 1,6-bisphosphate metabolic process; carbohydrate metabolic process; fructose 6-phosphate metabolic process; glycolysis; negative regulation of insulin secretion; protein homotetramerization; response to glucose stimulus	rno00010:Glycolysis / Gluconeogenesis; rno00030:Pentose phosphate pathway; rno00051:Fructose and mannose metabolism; rno00052:Galactose metabolism	1
ENSRNOG00000001271	Card6	caspase recruitment domain family, member 6	regulation of apoptosis	rno04621:NOD-like receptor signaling pathway	1
ENSRNOG00000001291	Adap1	ArfGAP with dual PH domains 1	inositol phosphate-mediated signaling; regulation of ARF GTPase activity		1
ENSRNOG00000001297	Prmt2	protein arginine methyltransferase 2			1
ENSRNOG00000001389	Irs3	insulin receptor substrate 3		rno04722:Neurotrophin signaling pathway; rno04910:Insulin signaling pathway; rno04920:Adipocytokine signaling pathway; rno04930:Type II diabetes mellitus; rno04960:Aldosterone-regulated sodium reabsorption	1
ENSRNOG00000001404	Agfg2	ArfGAP with FG repeats 2	regulation of ARF GTPase activity		1
ENSRNOG00000001419	Cldn15	claudin 15		rno04514:Cell adhesion molecules (CAMs); rno04530:Tight junction; rno04670:Leukocyte transendothelial migration	1
ENSRNOG00000001466	LOC687842	cytochrome P450 2C13, male-specific-like; "cytochrome P450, family 2, subfamily c, polypeptide 55-like"; Cytochrome P450 2C55-like; similar to Cytochrome P450 2C24 (CYPIIC24) (P450-PROS2)	oxidation reduction	rno00590:Arachidonic acid metabolism; rno00591:Linoleic acid metabolism; rno00830:Retinol metabolism; rno00980:Metabolism of xenobiotics by cytochrome P450; rno00982:Drug metabolism	1
ENSRNOG00000001517	Pdk1	pyruvate dehydrogenase kinase, isozyme 1	carbohydrate metabolic process; cell surface receptor linked signal transduction; glucose metabolic process; peptidyl-histidine phosphorylation; signal transduction	rno04660:T cell receptor signaling pathway; rno04664:Fc epsilon RI signaling pathway; rno04722:Neurotrophin signaling pathway	1
ENSRNOG00000001522	Map1d	methionine aminopeptidase 1D	cellular process; proteolysis		1
ENSRNOG00000001531	Chac2	ChaC, cation transport regulator homolog 2 (E. coli)			1
ENSRNOG00000001548	Nfe2l2	nuclear factor, erythroid derived 2, like 2	positive regulation of transcription, DNA-dependent; endoplasmic reticulum unfolded protein response; regulation of embryonic development; regulation of transcription		1
ENSRNOG00000001554	RGD1563888	similar to DNA segment, Chr 16, ERATO Doi 472, expressed			1
ENSRNOG00000001653	St3gal6	ST3 beta-galactoside alpha-2,3-sialyltransferase 6	protein amino acid glycosylation	rno00601:Glycosphingolipid biosynthesis	1
ENSRNOG00000001742	Clcn2	chloride channel 2	chloride transport; lung development; transmembrane transport		1
ENSRNOG00000001748	Polr2h	polymerase (RNA) II (DNA directed) polypeptide H; similar to polymerase (RNA) II (DNA directed) polypeptide H	transcription	rno00230:Purine metabolism; rno00240:Pyrimidine metabolism; rno03020:RNA polymerase; rno05016:Huntington's disease	1
ENSRNOG00000001750	Chrd	chordin	central nervous system development; dorsal/ventral pattern formation; forebrain development; gastrulation with mouth forming second; mesoderm formation; negative regulation of BMP signaling pathway; negative regulation of cell migration; negative regulation of osteoblast differentiation; pattern specification process; positive regulation of cell adhesion; skeletal system development	rno04350:TGF-beta signaling pathway	1
ENSRNOG00000001765	Ostalpha	organic solute transporter alpha	transport		1
ENSRNOG00000001803	Dnajb11	DnaJ (Hsp40) homolog, subfamily B, member 11	mRNA modification; protein folding		1
ENSRNOG00000001974	Gramd1c	GRAM domain containing 1C			1
ENSRNOG00000001990	Ugt2b17	UDP glucuronosyltransferase 2 family, polypeptide B1	drug metabolic process; metabolic process	rno00040:Pentose and glucuronate interconversions; rno00053:Ascorbate and aldarate metabolism; rno00140:Steroid hormone biosynthesis; rno00500:Starch and sucrose metabolism; rno00830:Retinol metabolism; rno00860:Porphyrin and chlorophyll metabolism; rno00980:Metabolism of xenobiotics by cytochrome P450; rno00982:Drug metabolism; rno00983:Drug metabolism	1
ENSRNOG00000002042	Gfi1	growth factor independent 1 transcription repressor	auditory receptor cell differentiation; cell fate commitment; inner ear morphogenesis; negative regulation of gene-specific transcription from RNA polymerase II promoter; regulation of transcription		1
ENSRNOG00000002051	Synj1	synaptojanin 1	brain development; dephosphorylation; endocytosis; positive regulation of receptor-mediated endocytosis; response to cytokine stimulus; response to retinoic acid	rno00562:Inositol phosphate metabolism; rno04070:Phosphatidylinositol signaling system	1
ENSRNOG00000002061	Q99ND7_RAT	protein tyrosine phosphatase, non-receptor type 13	dephosphorylation; protein amino acid dephosphorylation		1
ENSRNOG00000002115	Sod1	superoxide dismutase 1, soluble	DNA fragmentation involved in apoptosis; activation of MAPK activity; anti-apoptosis; auditory receptor cell stereocilium organization; cell aging; cellular iron ion homeostasis; double-strand break repair; embryo implantation; glutathione metabolic process; hydrogen peroxide biosynthetic process; locomotory behavior; muscle homeostasis; myeloid cell homeostasis; negative regulation of neuron apo…	rno05014:Amyotrophic lateral sclerosis (ALS); rno05016:Huntington's disease; rno05020:Prion diseases	1
ENSRNOG00000002272	Lnx1	ligand of numb-protein X 1	protein homooligomerization; protein ubiquitination during ubiquitin-dependent protein catabolic process		1
ENSRNOG00000002320	Commd8	COMM domain containing 8			1
ENSRNOG00000002361	Prkg2	protein kinase, cGMP-dependent, type II	protein amino acid phosphorylation	rno04540:Gap junction; rno04730:Long-term depression; rno04740:Olfactory transduction	1
ENSRNOG00000002373	Akap1	A kinase (PRKA) anchor protein 1	cellular response to insulin stimulus		1
ENSRNOG00000002381	Bmp3	bone morphogenetic protein 3	cartilage development; cell differentiation; growth; multicellular organismal development; ossification; positive regulation of transcription from RNA polymerase II promoter		1
ENSRNOG00000002544	Kifap3	kinesin-associated protein 3	microtubule-based process; negative regulation of cell proliferation; protein localization		1
ENSRNOG00000002556	B0BN59_RAT	TSR2, 20S rRNA accumulation, homolog (S. cerevisiae)			1
ENSRNOG00000002640	Serpinb5	serpin peptidase inhibitor, clade B (ovalbumin), member 5	extracellular matrix organization; morphogenesis of an epithelium; regulation of epithelial cell proliferation	rno04115:p53 signaling pathway	1
ENSRNOG00000002643	Ugdh	UDP-glucose dehydrogenase	gastrulation with mouth forming second; metabolic process; oxidation reduction	rno00040:Pentose and glucuronate interconversions; rno00053:Ascorbate and aldarate metabolism; rno00500:Starch and sucrose metabolism; rno00520:Amino sugar and nucleotide sugar metabolism	1
ENSRNOG00000002710	RGD1564833	consortin, connexin sorting protein			1
ENSRNOG00000002778	Aatf	apoptosis antagonizing transcription factor	anti-apoptosis; apoptosis; cell adhesion; positive regulation of transcription; positive regulation of transcription from RNA polymerase II promoter; regulation of mitotic cell cycle; response to DNA damage stimulus; ribosome biogenesis		1
ENSRNOG00000002813	Dars2	aspartyl-tRNA synthetase 2 (mitochondrial)	tRNA aminoacylation for protein translation; translation	rno00970:Aminoacyl-tRNA biosynthesis	1
ENSRNOG00000002848	Maoa	monoamine oxidase A	neurotransmitter catabolic process; oxidation reduction; serotonin metabolic process	rno00260:Glycine, serine and threonine metabolism; rno00330:Arginine and proline metabolism; rno00340:Histidine metabolism; rno00350:Tyrosine metabolism; rno00360:Phenylalanine metabolism; rno00380:Tryptophan metabolism; rno00982:Drug metabolism	1
ENSRNOG00000002935	Ankrd40	ankyrin repeat domain 40			1
ENSRNOG00000002970	RGD1310324	hypothetical LOC287388	cellular amino acid metabolic process		1
ENSRNOG00000003076	Rbms2	RNA binding motif, single stranded interacting protein 2			1
ENSRNOG00000003098	Prom1	prominin 1			1
ENSRNOG00000003134	Slc4a4	solute carrier family 4, sodium bicarbonate cotransporter, member 4	anion transport; regulation of pH; sodium ion transport; transport		1
ENSRNOG00000003195	CSKI1_RAT	CASK interacting protein 1	signal transduction		1
ENSRNOG00000003370	Otc	ornithine carbamoyltransferase	cellular amino acid biosynthetic process; cellular amino acid metabolic process; protein oligomerization; urea cycle	rno00330:Arginine and proline metabolism	1
ENSRNOG00000003504	Rnaseh2a	ribonuclease H2, subunit A	RNA metabolic process	rno03030:DNA replication	1
ENSRNOG00000003649	QSOX1_RAT	quiescin Q6 sulfhydryl oxidase 1	cell redox homeostasis; oxidation reduction		1
ENSRNOG00000003667	Dmd	dystrophin	muscle homeostasis; muscle organ development; neuron projection morphogenesis; regulation of transcription; skeletal muscle tissue development		1
ENSRNOG00000003720	Prrx1	paired related homeobox 1	artery morphogenesis; cartilage development; embryonic cranial skeleton morphogenesis; embryonic limb morphogenesis; inner ear morphogenesis; middle ear morphogenesis; multicellular organismal development; negative regulation of transcription from RNA polymerase II promoter; palate development; positive regulation of mesenchymal cell proliferation; positive regulation of smoothened signaling path…		1
ENSRNOG00000003800	Rgs9	regulator of G-protein signaling 9	dopamine receptor signaling pathway; intracellular signaling cascade; negative regulation of signal transduction; nervous system development; positive regulation of GTPase activity; regulation of G-protein coupled receptor protein signaling pathway; response to estrogen stimulus; response to stimulus; visual perception		1
ENSRNOG00000003865	Tmigd1	transmembrane and immunoglobulin domain containing 1			1
ENSRNOG00000003973	Cyb5r1	cytochrome b5 reductase 1	oxidation reduction	rno00520:Amino sugar and nucleotide sugar metabolism	1
ENSRNOG00000004009	Xpnpep2	X-prolyl aminopeptidase (aminopeptidase P) 2, membrane-bound	cellular process; proteolysis		1
ENSRNOG00000004160	Prps2	phosphoribosyl pyrophosphate synthetase 2	nucleoside metabolic process; nucleotide biosynthetic process	rno00030:Pentose phosphate pathway; rno00230:Purine metabolism	1
ENSRNOG00000004168	Slc35e4	solute carrier family 35, member E4	transmembrane transport		1
ENSRNOG00000004179	Nts	neurotensin	regulation of blood vessel size		1
ENSRNOG00000004287	Morg1	mitogen-activated protein kinase organizer 1	RNA splicing, via transesterification reactions; "nuclear mRNA splicing, via spliceosome"; RNA splicing		1
ENSRNOG00000004341	LOC498222	similar to specifically androgen-regulated protein			1
ENSRNOG00000004344	Zdhhc3	zinc finger, DHHC-type containing 3	protein palmitoylation; protein targeting		1
ENSRNOG00000004362	Rps6ka5	ribosomal protein S6 kinase, polypeptide 5	protein amino acid phosphorylation; protein kinase cascade; response to chemical stimulus; response to external stimulus; response to stress	rno04010:MAPK signaling pathway; rno04722:Neurotrophin signaling pathway	1
ENSRNOG00000004413	Exosc7	exosome component 7	RNA processing	rno03018:RNA degradation	1
ENSRNOG00000004549	Dhx40	DEAH (Asp-Glu-Ala-His) box polypeptide 40			1
ENSRNOG00000004666	Prr5l	proline rich 5 like			1
ENSRNOG00000004710	Rbks	ribokinase		rno00030:Pentose phosphate pathway	1
ENSRNOG00000004711	Mta1	metastasis associated 1			1
ENSRNOG00000004725	Cela1	chymotrypsin-like elastase family, member 1	proteolysis		1
ENSRNOG00000004781	Crmp1	collapsin response mediator protein 1	neuron development		1
ENSRNOG00000004786	Cyp4f1	cytochrome P450, family 4, subfamily f, polypeptide 1	arachidonic acid metabolic process; oxidation reduction; response to toxin	rno00590:Arachidonic acid metabolism	1
ENSRNOG00000004794	RTN1_RAT	reticulon 1	nucleosome assembly		1
ENSRNOG00000004813	LOC362855	P55			1
ENSRNOG00000004874	Flrt3	fibronectin leucine rich transmembrane protein 3	cell adhesion		1
ENSRNOG00000004951	Kif16b	kinesin family member 16B	cell communication; microtubule-based movement		1
ENSRNOG00000004980	Rangrf	RAN guanine nucleotide release factor			1
ENSRNOG00000005071	RGD1563311	ribosomal protein L7a; similar to 60S ribosomal protein L7a	ribosome biogenesis	rno03010:Ribosome	1
ENSRNOG00000005175	Sgpp1	sphingosine-1-phosphate phosphatase 1	apoptosis; sphingolipid metabolic process	rno00600:Sphingolipid metabolism	1
ENSRNOG00000005229	Sec16b	SEC16 homolog B (S. cerevisiae)	protein transport; vesicle-mediated transport		1
ENSRNOG00000005247	Surf1	surfeit 1; surfeit 4			1
ENSRNOG00000005362	Rab3ip	RAB3A interacting protein (rabin3)	protein transport		1
ENSRNOG00000005424	Odc1	ornithine decarboxylase 1		rno00330:Arginine and proline metabolism; rno00480:Glutathione metabolism	1
ENSRNOG00000005505	Wbp11	WW domain binding protein 11	RNA splicing; mRNA processing; rRNA processing	rno03040:Spliceosome	1
ENSRNOG00000005517	Rps26	ribosomal protein S26; ribosomal protein S26-like	translation	rno03010:Ribosome	1
ENSRNOG00000005575	Abi3	ABI family, member 3	regulation of cell migration		1
ENSRNOG00000005587	Suclg1	succinate-CoA ligase, alpha subunit	metabolic process; succinate metabolic process; tricarboxylic acid cycle	rno00020:Citrate cycle (TCA cycle); rno00640:Propanoate metabolism	1
ENSRNOG00000005614	Txn2	thioredoxin 2	cell redox homeostasis; electron transport chain; response to axon injury; response to drug; response to glucose stimulus; response to hormone stimulus; response to hypoxia; response to nutrient; response to organic cyclic substance; response to oxidative stress; transport		1
ENSRNOG00000005641	B1WBR8_RAT	F-box and leucine-rich repeat protein 4			1
ENSRNOG00000005660	F110C_RAT	family with sequence similarity 110, member C			1
ENSRNOG00000005669	Car8	carbonic anhydrase 8	one-carbon metabolic process; phosphoinositide-mediated signaling	rno00910:Nitrogen metabolism	1
ENSRNOG00000005841	Txndc4	endoplasmic reticulum protein 44	cell redox homeostasis; protein folding; response to unfolded protein		1
ENSRNOG00000005849	Aco1	aconitase 1, soluble	cellular iron ion homeostasis; citrate metabolic process; metabolic process; regulation of translation; tricarboxylic acid cycle	rno00020:Citrate cycle (TCA cycle); rno00630:Glyoxylate and dicarboxylate metabolism	1
ENSRNOG00000005979	Fam3c	family with sequence similarity 3, member C			1
ENSRNOG00000006077	B1H267_RAT	sorting nexin 5	cell communication		1
ENSRNOG00000006305	Slc38a2	solute carrier family 38, member 2	amino acid transport; ion transport; sodium ion transport		1
ENSRNOG00000006328	Wwp1	WW domain containing E3 ubiquitin protein ligase 1	modification-dependent protein catabolic process; negative regulation of transcription; protein modification process	rno04120:Ubiquitin mediated proteolysis; rno04144:Endocytosis	1
ENSRNOG00000006329	Peli1	pellino 1	positive regulation of B cell proliferation; positive regulation of I-kappaB kinase/NF-kappaB cascade; positive regulation of cytokine production; positive regulation of protein ubiquitination; response to lipopolysaccharide		1
ENSRNOG00000006378	Mga	MAX gene associated	regulation of transcription		1
ENSRNOG00000006454	Rph3al	rabphilin 3A-like (without C2 domains)	exocytosis; glucose homeostasis; intracellular protein transport; intracellular signaling cascade; negative regulation of G-protein coupled receptor protein signaling pathway; regulation of calcium ion-dependent exocytosis		1
ENSRNOG00000006611	NOSTN_RAT	nitric oxide synthase trafficker	negative regulation of transcription, DNA-dependent; endocytosis		1
ENSRNOG00000006636	Otud6b	OTU domain containing 6B			1
ENSRNOG00000006652	Ddx1	DEAD (Asp-Glu-Ala-Asp) box polypeptide 1	multicellular organismal development		1
ENSRNOG00000006675	Fabp1	fatty acid binding protein 1, liver	intestinal absorption; long-chain fatty acid transport; mitosis; positive regulation of cell proliferation; positive regulation of fatty acid beta-oxidation; transport	rno03320:PPAR signaling pathway	1
ENSRNOG00000006695	Rbck1	RanBP-type and C3HC4-type zinc finger containing 1	modification-dependent protein catabolic process		1
ENSRNOG00000006697	Tmem55a	transmembrane protein 55A			1
ENSRNOG00000006800	CI125_RAT	similar to RIKEN cDNA 2810432L12			1
ENSRNOG00000006807	ALDOB_RAT	aldolase B, fructose-bisphosphate	fructose 1,6-bisphosphate metabolic process; cellular response to extracellular stimulus; cellular response to insulin stimulus; gluconeogenesis; glycolysis; liver development; metabolic process; positive regulation of ATPase activity; response to amino acid stimulus; response to cAMP; response to carbohydrate stimulus; response to copper ion; response to drug; response to fructose stimulus; resp…	rno00010:Glycolysis / Gluconeogenesis; rno00030:Pentose phosphate pathway; rno00051:Fructose and mannose metabolism	1
ENSRNOG00000006818	Arl6ip5	ADP-ribosylation-like factor 6 interacting protein 5	L-glutamate transport		1
ENSRNOG00000006864	Znf291	S-phase cyclin A-associated protein in the ER			1
ENSRNOG00000006877	Efnb1	ephrin B1	axon guidance; cell differentiation; embryonic pattern specification; ephrin receptor signaling pathway; multicellular organismal development; nervous system development; neural crest cell migration; positive regulation of T cell proliferation	rno04360:Axon guidance	1
ENSRNOG00000006937	Scn3b	sodium channel, voltage-gated, type III, beta	ion transport; sodium ion transport		1
ENSRNOG00000006941	Thumpd3	THUMP domain containing 3			1
ENSRNOG00000007023	Galm	galactose mutarotase (aldose 1-epimerase)	carbohydrate metabolic process	rno00010:Glycolysis / Gluconeogenesis	1
ENSRNOG00000007032	Amigo2	adhesion molecule with Ig like domain 2; transmembrane protein AMIGO2-like	anti-apoptosis; cell adhesion; heterophilic cell adhesion; homophilic cell adhesion; negative regulation of programmed cell death		1
ENSRNOG00000007041	Abcg2	ATP-binding cassette, subfamily G (WHITE), member 2	drug transport	rno02010:ABC transporters	1
ENSRNOG00000007077	Fem1b	fem-1 homolog b (C. elegans)	modification-dependent protein catabolic process; regulation of apoptosis		1
ENSRNOG00000007118	Fam176a	family with sequence similarity 176, member A			1
ENSRNOG00000007136	Anxa7	annexin A7	membrane fusion; response to calcium ion; response to organic cyclic substance		1
ENSRNOG00000007160	Csrp2bp	CSRP2 binding protein	cell cycle process; embryonic development; histone acetylation; metabolic process		1
ENSRNOG00000007197	Nr1h4	nuclear receptor subfamily 1, group H, member 4	bile acid metabolic process; gut development; negative regulation of transcription from RNA polymerase II promoter; positive regulation of transcription from RNA polymerase II promoter; response to glucose stimulus; response to lipopolysaccharide		1
ENSRNOG00000007292	Ccdc99	coiled-coil domain containing 99	cell cycle; cell division; establishment of mitotic spindle orientation; mitosis; mitotic metaphase plate congression		1
ENSRNOG00000007331	Rragd	Ras-related GTP binding D	small GTPase mediated signal transduction		1
ENSRNOG00000007336	Churc1	churchill domain containing 1	multicellular organismal development; positive regulation of transcription		1
ENSRNOG00000007372	Casp1	caspase 1	apoptosis; cell death; induction of apoptosis; positive regulation of I-kappaB kinase/NF-kappaB cascade; positive regulation of cytokine secretion; positive regulation of interleukin-1 beta secretion; protein processing; proteolysis; regulation of apoptosis; response to ATP; response to chemical stimulus; response to hypoxia	rno04621:NOD-like receptor signaling pathway; rno04623:Cytosolic DNA-sensing pathway; rno05014:Amyotrophic lateral sclerosis (ALS)	1
ENSRNOG00000007379	Iah1	isoamyl acetate-hydrolyzing esterase 1 homolog (S. cerevisiae)	lipid catabolic process; lipid metabolic process		1
ENSRNOG00000007427	Entpd6	ectonucleoside triphosphate diphosphohydrolase 6		rno00230:Purine metabolism; rno00240:Pyrimidine metabolism	1
ENSRNOG00000007467	Ace	angiotensin I converting enzyme (peptidyl-dipeptidase A) 1	arachidonic acid secretion; kidney development; proteolysis; regulation of blood pressure; response to hypoxia	rno04614:Renin-angiotensin system; rno05410:Hypertrophic cardiomyopathy (HCM)	1
ENSRNOG00000007611	Hoxb7	homeo box B7	anterior/posterior pattern formation; embryonic skeletal system morphogenesis; multicellular organismal development; myeloid cell differentiation		1
ENSRNOG00000007728	Gsdmd	gasdermin D	cellular response to extracellular stimulus		1
ENSRNOG00000007743	Mgst1	microsomal glutathione S-transferase 1	Leydig cell differentiation; glutathione metabolic process; response to drug; response to lipopolysaccharide; response to organic nitrogen	rno00480:Glutathione metabolism; rno00980:Metabolism of xenobiotics by cytochrome P450; rno00982:Drug metabolism	1
ENSRNOG00000007758	H17B6_RAT	hydroxysteroid (17-beta) dehydrogenase 6; hydroxysteroid 17-beta dehydrogenase 6-like	androgen metabolic process; lipid metabolic process; metabolic process; oxidation reduction		1
ENSRNOG00000007821	Dyrk2	dual-specificity tyrosine-(Y)-phosphorylation regulated kinase 2	DNA damage response, signal transduction by p53 class mediator resulting in induction of apoptosis; positive regulation of glycogen biosynthetic process; protein amino acid phosphorylation		1
ENSRNOG00000007823	Hoxb6	homeo box B6	anterior/posterior pattern formation; embryonic skeletal system morphogenesis		1
ENSRNOG00000007890	Usp1	ubiquitin specific peptidase 1	protein deubiquitination; response to DNA damage stimulus; response to UV; ubiquitin-dependent protein catabolic process		1
ENSRNOG00000007927	Mettl7b	methyltransferase like 7B	metabolic process		1
ENSRNOG00000007967	Sdhb	succinate dehydrogenase complex, subunit B, iron sulfur (Ip)	oxidation reduction; respiratory electron transport chain; succinate metabolic process; transport; tricarboxylic acid cycle	rno00020:Citrate cycle (TCA cycle); rno00190:Oxidative phosphorylation; rno05010:Alzheimer's disease; rno05012:Parkinson's disease; rno05016:Huntington's disease	1
ENSRNOG00000008012	Abcb1a	ATP-binding cassette, sub-family B (MDR/TAP), member 1A	drug transport; response to cadmium ion; transmembrane transport; transport	rno02010:ABC transporters	1
ENSRNOG00000008074	Cyp11a1	cytochrome P450, family 11, subfamily a, polypeptide 1	cerebellum development; cholesterol metabolic process; lipid metabolic process; mating behavior; oxidation reduction; response to cAMP; response to cadmium ion; response to estrogen stimulus; response to hydrogen peroxide; response to nutrient	rno00140:Steroid hormone biosynthesis	1
ENSRNOG00000008121	Slc13a1	solute carrier family 13 (sodium/sulfate symporters), member 1	ion transport; sodium ion transport; sulfate transport; transmembrane transport		1
ENSRNOG00000008167	Abhd6	abhydrolase domain containing 6			1
ENSRNOG00000008184	RGD1560481	epithelial splicing regulatory protein 1	mRNA processing; regulation of RNA splicing		1
ENSRNOG00000008191	Hoxb4	homeo box B4	anterior/posterior pattern formation; cell proliferation; definitive hemopoiesis; embryonic skeletal system morphogenesis; morphogenesis of an epithelial sheet; multicellular organismal development; negative regulation of transcription from RNA polymerase II promoter; somatic stem cell division; spleen development		1
ENSRNOG00000008329	Ndufb11	NADH dehydrogenase (ubiquinone) 1 beta subcomplex, 11			1
ENSRNOG00000008340	RGD1309779	similar to ENSANGP00000021391			1
ENSRNOG00000008371	Igfbp1	insulin-like growth factor binding protein 1	glucose metabolic process; insulin receptor signaling pathway; phosphoinositide-mediated signaling; positive regulation of cell growth; regulation of cell growth; tissue regeneration		1
ENSRNOG00000008378	Zfp414	zinc finger protein 414	regulation of transcription		1
ENSRNOG00000008475	Fut9	fucosyltransferase 9 (alpha (1,3) fucosyltransferase)	nervous system development; protein amino acid glycosylation	rno00601:Glycosphingolipid biosynthesis; rno00603:Glycosphingolipid biosynthesis	1
ENSRNOG00000008569	Ndufa6	NADH dehydrogenase (ubiquinone) 1 alpha subcomplex, 6 (B14)	response to oxidative stress	rno00190:Oxidative phosphorylation; rno05010:Alzheimer's disease; rno05012:Parkinson's disease; rno05016:Huntington's disease	1
ENSRNOG00000008570	Cadps	Ca++-dependent secretion activator	protein transport; regulated secretory pathway; vesicle organization		1
ENSRNOG00000008591	Colec10	collectin sub-family member 10			1
ENSRNOG00000008614	Zfyve1	zinc finger, FYVE domain containing 1			1
ENSRNOG00000008615	Mal2	mal, T-cell differentiation protein 2			1
ENSRNOG00000008706	Tbx3	T-box 3	negative regulation of transcription, DNA-dependent; "positive regulation of transcription, DNA-dependent"; anti-apoptosis; blood vessel development; branching involved in mammary gland duct morphogenesis; branching morphogenesis of a tube; cardiac muscle cell differentiation; cell aging; embryonic digit morphogenesis; heart looping; in utero embryonic development; male genitalia development; mam…		1
ENSRNOG00000008708	Pycrl	pyrroline-5-carboxylate reductase-like	cellular amino acid biosynthetic process; glycerol-3-phosphate catabolic process; metabolic process; oxidation reduction; proline biosynthetic process	rno00330:Arginine and proline metabolism	1
ENSRNOG00000008839	Pparg	peroxisome proliferator-activated receptor gamma	brown fat cell differentiation; cell fate commitment; cell maturation; cellular response to insulin stimulus; epithelial cell differentiation; glucose homeostasis; lipoprotein transport; long-chain fatty acid transport; negative regulation of cell growth; negative regulation of cell proliferation; negative regulation of gene-specific transcription from RNA polymerase II promoter; negative regulat…	rno03320:PPAR signaling pathway; rno05016:Huntington's disease; rno05200:Pathways in cancer; rno05216:Thyroid cancer	1
ENSRNOG00000008901	Coro2a	coronin, actin binding protein 2A	nitrogen compound metabolic process		1
ENSRNOG00000008922	Trim14	tripartite motif-containing 14			1
ENSRNOG00000008989	Cryl1	crystallin, lambda 1	fatty acid metabolic process; metabolic process; oxidation reduction	rno00040:Pentose and glucuronate interconversions	1
ENSRNOG00000009035	RGD1306936	similar to chromosome 7 open reading frame 30			1
ENSRNOG00000009063	Dnajc15	DnaJ (Hsp40) homolog, subfamily C, member 15			1
ENSRNOG00000009134	Mad2l2	MAD2 mitotic arrest deficient-like 2 (yeast)	mitosis	rno04110:Cell cycle; rno04114:Oocyte meiosis; rno04914:Progesterone-mediated oocyte maturation	1
ENSRNOG00000009140	C1qtnf4	C1q and tumor necrosis factor related protein 4			1
ENSRNOG00000009155	Ndufs3	NADH dehydrogenase (ubiquinone) Fe-S protein 3	induction of apoptosis; negative regulation of cell growth; oxidation reduction; oxygen and reactive oxygen species metabolic process	rno00190:Oxidative phosphorylation; rno05010:Alzheimer's disease; rno05012:Parkinson's disease; rno05016:Huntington's disease	1
ENSRNOG00000009177	Fcer1a	Fc fragment of IgE, high affinity I, receptor for; alpha polypeptide	activation of JUN kinase activity; cell surface receptor linked signal transduction; immune response; leukotriene biosynthetic process; positive regulation of calcium-mediated signaling; positive regulation of mast cell degranulation; positive regulation of peptidyl-tyrosine phosphorylation	rno04664:Fc epsilon RI signaling pathway; rno05310:Asthma	1
ENSRNOG00000009204	Il17re	interleukin 17 receptor E			1
ENSRNOG00000009217	Fbxo6	F-box protein 6	DNA repair; ER-associated protein catabolic process; glycoprotein catabolic process; modification-dependent protein catabolic process; protein catabolic process; response to DNA damage stimulus; response to unfolded protein		1
ENSRNOG00000009345	Ugt8	UDP glycosyltransferase 8	metabolic process; myelination	rno00600:Sphingolipid metabolism	1
ENSRNOG00000009381	Mapk6	mitogen-activated protein kinase 6	cell cycle; protein amino acid phosphorylation		1
ENSRNOG00000009460	Pdzd8	PDZ domain containing 8	intracellular signaling cascade		1
ENSRNOG00000009512	Esd	esterase D/formylglutathione hydrolase			1
ENSRNOG00000009536	Pgp	phosphoglycolate phosphatase	metabolic process	rno00630:Glyoxylate and dicarboxylate metabolism	1
ENSRNOG00000009564	RGD1311589	proline rich 15			1
ENSRNOG00000009571	Wipf3	WAS/WASL interacting protein family, member 3	cell differentiation; multicellular organismal development; spermatogenesis		1
ENSRNOG00000009729	Ubp1	upstream binding protein 1 (LBP-1a)	angiogenesis		1
ENSRNOG00000009739	E430025E21Rik	similar to Hypothetical protein MGC31278			1
ENSRNOG00000009741	CP4B1_RAT	cytochrome P450, family 4, subfamily b, polypeptide 1	cellular aromatic compound metabolic process; oxidation reduction		1
ENSRNOG00000010131	Rin2	Ras and Rab interactor 2	signal transduction		1
ENSRNOG00000010219	GNDS_RAT	ral guanine nucleotide dissociation stimulator	regulation of small GTPase mediated signal transduction; signal transduction; small GTPase mediated signal transduction	rno05200:Pathways in cancer; rno05210:Colorectal cancer; rno05212:Pancreatic cancer	1
ENSRNOG00000010222	Glud1	glutamate dehydrogenase 1	cellular amino acid metabolic process; long-term memory; metabolic process; negative regulation of insulin secretion; oxidation reduction; positive regulation of insulin secretion	rno00250:Alanine, aspartate and glutamate metabolism; rno00330:Arginine and proline metabolism; rno00471:D-Glutamine and D-glutamate metabolism; rno00910:Nitrogen metabolism	1
ENSRNOG00000010270	Espn	espin	actin filament bundle formation; locomotory behavior; sensory perception of sound		1
ENSRNOG00000010349	Ghrl	ghrelin/obestatin prepropeptide	actin polymerization or depolymerization; activation of MAPK activity; adult feeding behavior; anti-apoptosis; decidualization; dendrite development; elevation of cytosolic calcium ion concentration; gastric acid secretion; negative regulation of endothelial cell proliferation; negative regulation of inflammatory response; negative regulation of insulin secretion; positive regulation of growth ho…		1
ENSRNOG00000010407	Q2M2R8_RAT	peroxisomal biogenesis factor 5	cell development; cellular lipid metabolic process; cerebral cortex cell migration; endoplasmic reticulum organization; fatty acid beta-oxidation; mitochondrial membrane organization; neuromuscular process; neuron migration; peroxisome organization; positive regulation of multicellular organism growth; very-long-chain fatty acid metabolic process		1
ENSRNOG00000010475	Casp3	caspase 3	apoptosis; hippocampus development; induction of apoptosis; intracellular signaling cascade; learning or memory; neuron differentiation; positive regulation of neuron apoptosis; proteolysis; response to X-ray; response to amino acid stimulus; response to antibiotic; response to cobalt ion; response to drug; response to estradiol stimulus; response to glucocorticoid stimulus; response to glucose s…	rno04010:MAPK signaling pathway; rno04115:p53 signaling pathway; rno04210:Apoptosis; rno04650:Natural killer cell mediated cytotoxicity; rno05010:Alzheimer's disease; rno05012:Parkinson's disease; rno05014:Amyotrophic lateral sclerosis (ALS); rno05016:Huntington's disease; rno05200:Pathways in cancer; rno05210:Colorectal cancer; rno05416:Viral myocarditis	1
ENSRNOG00000010497	RGD1305807	hypothetical LOC298077			1
ENSRNOG00000010580	Acot7	acyl-CoA thioesterase 7	fatty acid catabolic process	rno01040:Biosynthesis of unsaturated fatty acids	1
ENSRNOG00000010603	Gzma	granzyme A	proteolysis	rno04080:Neuroactive ligand-receptor interaction	1
ENSRNOG00000010658	Cth	cystathionase (cystathionine gamma-lyase)	cellular amino acid biosynthetic process; cellular amino acid metabolic process; glutathione metabolic process; negative regulation of cell growth; negative regulation of cell proliferation; protein homotetramerization	rno00260:Glycine, serine and threonine metabolism; rno00270:Cysteine and methionine metabolism; rno00450:Selenoamino acid metabolism; rno00910:Nitrogen metabolism	1
ENSRNOG00000010673	Q5EBA0_RAT	Era (G-protein)-like 1 (E. coli)	small GTPase mediated signal transduction		1
ENSRNOG00000010695	Pdgfc	platelet derived growth factor C	organ morphogenesis; platelet-derived growth factor receptor signaling pathway; positive regulation of DNA replication; positive regulation of cell division; positive regulation of fibroblast proliferation; regulation of peptidyl-tyrosine phosphorylation	rno04510:Focal adhesion; rno04540:Gap junction; rno04810:Regulation of actin cytoskeleton; rno05215:Prostate cancer; rno05218:Melanoma	1
ENSRNOG00000010698	Car1	carbonic anhydrase 1	one-carbon metabolic process	rno00910:Nitrogen metabolism	1
ENSRNOG00000010753	Aig1	androgen-induced 1			1
ENSRNOG00000010777	Tox	thymocyte selection-associated high mobility group box			1
ENSRNOG00000010855	Mrp63	mitochondrial ribosomal protein 63			1
ENSRNOG00000010887	RGD1309534	similar to RIKEN cDNA 4931406C07			1
ENSRNOG00000010960	ANKH_RAT	ankylosis, progressive homolog (mouse)	phosphate transport; regulation of bone mineralization; transport		1
ENSRNOG00000010992	Hspb3	heat shock protein 3	response to heat		1
ENSRNOG00000010993	Dpm1	dolichyl-phosphate mannosyltransferase polypeptide 1, catalytic subunit		rno00510:N-Glycan biosynthesis	1
ENSRNOG00000011094	Efcab6	EF-hand calcium binding domain 6			1
ENSRNOG00000011119	Spin1	similar to spindlin; spindlin 1; spindlin-1-like	cell cycle; gamete generation; multicellular organismal development		1
ENSRNOG00000011195	Prkra	protein kinase, interferon inducible double stranded RNA dependent activator	gene silencing by RNA; induction of apoptosis; middle ear morphogenesis; protein amino acid phosphorylation; response to stress; skeletal system morphogenesis		1
ENSRNOG00000011201	Cmtm8	CKLF-like MARVEL transmembrane domain containing 8			1
ENSRNOG00000011211	Pex5l	peroxisomal biogenesis factor 5-like	regulated secretory pathway; regulation of membrane potential		1
ENSRNOG00000011234	Taf5l	TAF5-like RNA polymerase II, p300/CBP-associated factor (PCAF)-associated factor	histone H3 acetylation; regulation of transcription		1
ENSRNOG00000011260	Cmbl	carboxymethylenebutenolidase homolog (Pseudomonas)			1
ENSRNOG00000011278	Stk3	serine/threonine kinase 3 (STE20 homolog, yeast)	apoptosis; protein amino acid phosphorylation; signal transduction	rno04010:MAPK signaling pathway	1
ENSRNOG00000011283	Acn9	ACN9 homolog (S. cerevisiae)			1
ENSRNOG00000011311	Papss1	3'-phosphoadenosine 5'-phosphosulfate synthase 1		rno00230:Purine metabolism; rno00450:Selenoamino acid metabolism; rno00920:Sulfur metabolism	1
ENSRNOG00000011315	Med16	mediator complex subunit 16	androgen receptor signaling pathway; transcription initiation from RNA polymerase II promoter		1
ENSRNOG00000011330	Ces6	carboxylesterase 2A		rno00983:Drug metabolism	1
ENSRNOG00000011435	Osbpl10	oxysterol binding protein-like 10	steroid metabolic process		1
ENSRNOG00000011503	RGD1565350	similar to Shb protein	B cell proliferation		1
ENSRNOG00000011690	Fam82a2	family with sequence similarity 82, member A2	apoptosis; cell differentiation		1
ENSRNOG00000011778	Blvra	biliverdin reductase A	metabolic process; oxidation reduction	rno00860:Porphyrin and chlorophyll metabolism	1
ENSRNOG00000011794	Q5BK74_RAT	transcription elongation factor A (SII), 3	regulation of transcription; regulation of transcription from RNA polymerase II promoter; transcription		1
ENSRNOG00000011830	Plekha3	pleckstrin homology domain-containing, family A (phosphoinositide binding specific) member 3			1
ENSRNOG00000011936	ABHEA_RAT	abhydrolase domain containing 14A			1
ENSRNOG00000011952	Samm50	sorting and assembly machinery component 50 homolog (S. cerevisiae)			1
ENSRNOG00000011973	Il7	interleukin 7	anti-apoptosis; bone resorption; homeostasis of number of cells within a tissue; immune response; negative regulation of catalytic activity; negative regulation of cell growth; positive regulation of B cell proliferation; positive regulation of T cell differentiation; positive regulation of organ growth; regulation of gene expression	rno04060:Cytokine-cytokine receptor interaction; rno04630:Jak-STAT signaling pathway; rno04640:Hematopoietic cell lineage	1
ENSRNOG00000011994	Perp	PERP, TP53 apoptosis effector	induction of apoptosis	rno04115:p53 signaling pathway	1
ENSRNOG00000012074	Ifngr1	interferon gamma receptor 1	blood coagulation	rno04060:Cytokine-cytokine receptor interaction; rno04630:Jak-STAT signaling pathway; rno04650:Natural killer cell mediated cytotoxicity	1
ENSRNOG00000012123	Fdx1	ferredoxin 1	electron transport chain; transport		1
ENSRNOG00000012126	Stard3nl	STARD3 N-terminal like			1
ENSRNOG00000012136	Mrps30	mitochondrial ribosomal protein S30			1
ENSRNOG00000012193	Cited2	Cbp/p300-interacting transactivator, with Glu/Asp-rich carboxy-terminal domain, 2	positive regulation of transcription, DNA-dependent; adrenal gland development; anti-apoptosis; blood vessel development; cell proliferation; central nervous system development; decidualization; determination of left/right symmetry; embryonic placenta development; embryonic process involved in female pregnancy; heart development; liver development; negative regulation of cell migration; negative …		1
ENSRNOG00000012197	Bpil1	bactericidal/permeability-increasing protein-like 1			1
ENSRNOG00000012209	Q5XIE7_RAT	cytidine and dCMP deaminase domain containing 1			1
ENSRNOG00000012295	Pla2g6	phospholipase A2, group VI (cytosolic, calcium-independent)	lipid catabolic process; lipid metabolic process; metabolic process	rno00564:Glycerophospholipid metabolism; rno00565:Ether lipid metabolism; rno00590:Arachidonic acid metabolism; rno00591:Linoleic acid metabolism; rno00592:alpha-Linolenic acid metabolism; rno04010:MAPK signaling pathway; rno04270:Vascular smooth muscle contraction; rno04370:VEGF signaling pathway; rno04664:Fc epsilon RI signaling pathway; rno04666:Fc gamma R-mediated phagocytosis; rno04730:Long-…	1
ENSRNOG00000012333	Kbtbd11	kelch repeat and BTB (POZ) domain containing 11			1
ENSRNOG00000012421	Q5RJS7_RAT	ATPase, class VI, type 11B	ATP biosynthetic process; metabolic process; phospholipid transport		1
ENSRNOG00000012508	Slc39a8	solute carrier family 39 (zinc transporter), member 8	ion transport; metal ion transport; transmembrane transport; zinc ion transport		1
ENSRNOG00000012513	Pdk3	pyruvate dehydrogenase kinase, isozyme 3	peptidyl-histidine phosphorylation; signal transduction		1
ENSRNOG00000012584	RGD1561459	similar to RIKEN cDNA 1810020D17			1
ENSRNOG00000012659	Vamp5	vesicle-associated membrane protein 5	cell differentiation; multicellular organismal development; muscle organ development; skeletal muscle tissue development; vesicle-mediated transport	rno04130:SNARE interactions in vesicular transport	1
ENSRNOG00000012681	Lgals9	lectin, galactoside-binding, soluble, 9	ion transport		1
ENSRNOG00000012690	Nipa2	non imprinted in Prader-Willi/Angelman syndrome 2 homolog (human)	magnesium ion transport		1
ENSRNOG00000012738	RGD1565840	eukaryotic translation initiation factor 3, subunit M			1
ENSRNOG00000012748	Vamp8	vesicle-associated membrane protein 8	membrane fusion; protein complex assembly; vesicle-mediated transport	rno04130:SNARE interactions in vesicular transport	1
ENSRNOG00000012794	B0BN46_RAT	glyoxylate reductase/hydroxypyruvate reductase	metabolic process		1
ENSRNOG00000012799	Prkaa1	protein kinase, AMP-activated, alpha 1 catalytic subunit	cholesterol biosynthetic process; fatty acid biosynthetic process; fatty acid oxidation; glucose metabolic process; negative regulation of translation; positive regulation of fatty acid oxidation; positive regulation of glucose import; protein amino acid phosphorylation; protein heterooligomerization	rno04140:Regulation of autophagy; rno04150:mTOR signaling pathway; rno04910:Insulin signaling pathway; rno04920:Adipocytokine signaling pathway; rno05410:Hypertrophic cardiomyopathy (HCM)	1
ENSRNOG00000012841	Alg11	asparagine-linked glycosylation 11, alpha-1,2-mannosyltransferase homolog (yeast)	biosynthetic process	rno00510:N-Glycan biosynthesis	1
ENSRNOG00000012843	Aspg	asparaginase homolog (S. cerevisiae)	cellular amino acid metabolic process; lipid catabolic process; phospholipid metabolic process		1
ENSRNOG00000012881	Fgl2	fibrinogen-like 2	parturition; signal transduction		1
ENSRNOG00000012960	Uap1l1	UDP-N-acteylglucosamine pyrophosphorylase 1-like 1	metabolic process		1
ENSRNOG00000012966	Acadl	acyl-Coenzyme A dehydrogenase, long-chain	fatty acid metabolic process; lipid metabolic process; metabolic process; negative regulation of fatty acid biosynthetic process; oxidation reduction; temperature homeostasis	rno00071:Fatty acid metabolism; rno03320:PPAR signaling pathway	1
ENSRNOG00000012999	Phb2	prohibitin 2	mammary gland alveolus development; mammary gland branching involved in thelarche; regulation of transcription		1
ENSRNOG00000013024	Csgalnact1	chondroitin sulfate N-acetylgalactosaminyltransferase 1	chondroitin sulfate biosynthetic process	rno00532:Chondroitin sulfate biosynthesis	1
ENSRNOG00000013110	Nudt2	nudix (nucleoside diphosphate linked moiety X)-type motif 2		rno00230:Purine metabolism; rno00240:Pyrimidine metabolism	1
ENSRNOG00000013136	Oxsr1	oxidative-stress responsive 1	protein amino acid phosphorylation; protein kinase cascade; response to oxidative stress		1
ENSRNOG00000013149	Vps33b	vacuolar protein sorting 33 homolog B (yeast)	membrane fusion; protein transport; vesicle docking during exocytosis; vesicle-mediated transport		1
ENSRNOG00000013211	Chchd3	coiled-coil-helix-coiled-coil-helix domain containing 3			1
ENSRNOG00000013238	Tmem14a	transmembrane protein 14A			1
ENSRNOG00000013320	RGD1561916	similar to testes development-related NYD-SP22 isoform 1			1
ENSRNOG00000013323	Rnf217	ring finger protein 217			1
ENSRNOG00000013330	Pcdh21	protocadherin 21	cell adhesion; homophilic cell adhesion; photoreceptor cell maintenance; response to stimulus		1
ENSRNOG00000013343	Myg1	melanocyte proliferating gene 1			1
ENSRNOG00000013368	Plcl2	phospholipase C-like 2	intracellular signaling cascade; lipid metabolic process; signal transduction		1
ENSRNOG00000013439	Cpn1	carboxypeptidase N, polypeptide 1; carboxypeptidase N catalytic chain-like	proteolysis; response to glucocorticoid stimulus		1
ENSRNOG00000013595	Gls	glutaminase	glutamine metabolic process	rno00250:Alanine, aspartate and glutamate metabolism; rno00330:Arginine and proline metabolism; rno00471:D-Glutamine and D-glutamate metabolism; rno00910:Nitrogen metabolism	1
ENSRNOG00000013703	Siah2	seven in absentia 2	apoptosis; cell cycle; multicellular organismal development; regulation of protein ubiquitination; ubiquitin-dependent protein catabolic process		1
ENSRNOG00000013764	Fam118a	family with sequence similarity 118, member A			1
ENSRNOG00000013829	Chrna3	cholinergic receptor, nicotinic, alpha 3	synaptic transmission, cholinergic; behavioral response to nicotine; heart development; ion transport; locomotory behavior; nervous system development; regulation of dendrite morphogenesis; regulation of excitatory postsynaptic membrane potential; regulation of membrane potential; regulation of smooth muscle contraction; response to drug; response to inorganic substance; signal transduction; tran…		1
ENSRNOG00000013867	Fgf1	fibroblast growth factor 1	angiogenesis; cell differentiation; cellular response to heat; fibroblast growth factor receptor signaling pathway; induction of an organ; lung development; multicellular organismal development; nervous system development; positive regulation of cell adhesion; positive regulation of cell division; positive regulation of epithelial cell proliferation; positive regulation of protein amino acid phos…	rno04010:MAPK signaling pathway; rno04810:Regulation of actin cytoskeleton; rno05200:Pathways in cancer; rno05218:Melanoma	1
ENSRNOG00000013968	Comtd1	catechol-O-methyltransferase domain containing 1			1
ENSRNOG00000014055	Nat1	N-acetyltransferase 1; N-acetyltransferase 2	gut development; liver development; metabolic process	rno00232:Caffeine metabolism; rno00983:Drug metabolism	1
ENSRNOG00000014237	Znf503	zinc finger protein 503			1
ENSRNOG00000014303	Lrp11	low density lipoprotein receptor-related protein 11			1
ENSRNOG00000014314	Slc39a4	solute carrier family 39 (zinc transporter), member 4	ion transport; metal ion transport; transmembrane transport; zinc ion transport		1
ENSRNOG00000014362	Nudt14	nudix (nucleoside diphosphate linked moiety X)-type motif 14			1
ENSRNOG00000014369	Slc27a4	solute carrier family 27 (fatty acid transporter), member 4	long-chain fatty acid metabolic process; long-chain fatty acid transport; metabolic process; response to nutrient; skin development; transport	rno03320:PPAR signaling pathway	1
ENSRNOG00000014427	Chrnb4	cholinergic receptor, nicotinic, beta 4	behavioral response to nicotine; ion transport; locomotory behavior; regulation of action potential; regulation of smooth muscle contraction; signal transduction; transport		1
ENSRNOG00000014471	B3gnt6	UDP-GlcNAc:betaGal beta-1,3-N-acetylglucosaminyltransferase 6 (core 3 synthase)	protein amino acid glycosylation	rno00512:O-Glycan biosynthesis	1
ENSRNOG00000014481	RGD1305679	similar to 9530008L14Rik protein			1
ENSRNOG00000014508	Mgll	monoglyceride lipase		rno00561:Glycerolipid metabolism	1
ENSRNOG00000014518	Adam28	ADAM metallopeptidase domain 28	proteolysis		1
ENSRNOG00000014541	Ddx60	DEAD (Asp-Glu-Ala-Asp) box polypeptide 60			1
ENSRNOG00000014678	Fzd5	frizzled homolog 5 (Drosophila)	Wnt receptor signaling pathway; cell maturation; cell surface receptor linked signal transduction; multicellular organismal development	rno04310:Wnt signaling pathway; rno04916:Melanogenesis; rno05200:Pathways in cancer; rno05210:Colorectal cancer; rno05217:Basal cell carcinoma	1
ENSRNOG00000014685	Nlrp6	NLR family, pyrin domain containing 6			1
ENSRNOG00000014713	Csgalnact2	chondroitin sulfate N-acetylgalactosaminyltransferase 2		rno00532:Chondroitin sulfate biosynthesis	1
ENSRNOG00000014743	Hagh	hydroxyacyl glutathione hydrolase	carbohydrate metabolic process; glutathione biosynthetic process; glutathione metabolic process; spermatogenesis	rno00620:Pyruvate metabolism	1
ENSRNOG00000014952	Tctn3	tectonic family member 3			1
ENSRNOG00000015054	Rcbtb2	regulator of chromosome condensation (RCC1) and BTB (POZ) domain containing protein 2			1
ENSRNOG00000015072	Ptgr1	prostaglandin reductase 1	metabolic process; oxidation reduction; response to toxin		1
ENSRNOG00000015125	Spsb2	splA/ryanodine receptor domain and SOCS box containing 2	intracellular signaling cascade; modification-dependent protein catabolic process		1
ENSRNOG00000015210	Ggt6	gamma-glutamyl transferase 6	glutathione biosynthetic process	rno00430:Taurine and hypotaurine metabolism; rno00450:Selenoamino acid metabolism; rno00460:Cyanoamino acid metabolism; rno00480:Glutathione metabolism; rno00590:Arachidonic acid metabolism	1
ENSRNOG00000015213	Fxn	frataxin	adult walking behavior; aerobic respiration; cellular iron ion homeostasis; embryonic development ending in birth or egg hatching; mitochondrion organization; negative regulation of multicellular organism growth; positive regulation of cell growth; positive regulation of cell proliferation; positive regulation of transferase activity; protein autoprocessing; response to iron ion		1
ENSRNOG00000015242	Fbxl8	F-box and leucine-rich repeat protein 8			1
ENSRNOG00000015248	Abca12	ATP-binding cassette, subfamily A (ABC1), member 12		rno02010:ABC transporters	1
ENSRNOG00000015320	Atp5g2	ATP synthase lipid-binding protein, mitochondrial-like; "ATP synthase, H+ transporting, mitochondrial F0 complex, subunit C2 (subunit 9)"	ATP synthesis coupled proton transport; ion transport; proton transport; response to ethanol	rno00190:Oxidative phosphorylation; rno05010:Alzheimer's disease; rno05012:Parkinson's disease; rno05016:Huntington's disease	1
ENSRNOG00000015408	Vil1	villin 1	cytoskeleton organization		1
ENSRNOG00000015449	Tmem171	transmembrane protein 171			1
ENSRNOG00000015596	Efhd1	EF-hand domain family, member D1	neuron projection development		1
ENSRNOG00000015677	Cda	cytidine deaminase	negative regulation of cell growth; protein homotetramerization	rno00240:Pyrimidine metabolism; rno00983:Drug metabolism	1
ENSRNOG00000015711	Cetn3	centrin, EF-hand protein, 3 (CDC31 homolog, yeast)			1
ENSRNOG00000015733	Mrlc2	myosin, light chain 12B, regulatory		rno04510:Focal adhesion; rno04530:Tight junction; rno04670:Leukocyte transendothelial migration; rno04810:Regulation of actin cytoskeleton	1
ENSRNOG00000015753	Epn1	Epsin 1	endocytosis	rno04144:Endocytosis	1
ENSRNOG00000015809	Pecr	peroxisomal trans-2-enoyl-CoA reductase	fatty acid biosynthetic process; metabolic process; oxidation reduction	rno01040:Biosynthesis of unsaturated fatty acids	1
ENSRNOG00000015859	Chdh	choline dehydrogenase	oxidation reduction	rno00260:Glycine, serine and threonine metabolism	1
ENSRNOG00000015880	Dpep1	dipeptidase 1 (renal)	proteolysis		1
ENSRNOG00000015906	Tgif1	TGFB-induced factor homeobox 1	determination of left/right symmetry; dorsal/ventral pattern formation; negative regulation of cell growth; negative regulation of cell proliferation; negative regulation of transcription from RNA polymerase II promoter; neural tube closure; positive regulation of fibroblast proliferation; positive regulation of neuron differentiation; retina development in camera-type eye		1
ENSRNOG00000015911	B2RYI1_RAT	low density lipoprotein receptor-related protein 5	Wnt receptor signaling pathway; anterior/posterior pattern formation; cell migration involved in gastrulation; embryonic digit morphogenesis; gastrulation with mouth forming second	rno04310:Wnt signaling pathway	1
ENSRNOG00000015976	Snrpn	similar to small nuclear ribonucleoparticle-associated protein; small nuclear ribonucleoprotein polypeptide N	response to hormone stimulus	rno03040:Spliceosome; rno05322:Systemic lupus erythematosus	1
ENSRNOG00000015983	MGC94335	similar to hypothetical protein FLJ22555			1
ENSRNOG00000016121	Trip4	thyroid hormone receptor interactor 4	regulation of transcription		1
ENSRNOG00000016174	Slc35b3	solute carrier family 35, member B3	transmembrane transport		1
ENSRNOG00000016182	Tgfa	transforming growth factor alpha	activation of MAPK activity; angiogenesis; anti-apoptosis; cytosolic calcium ion homeostasis; epidermal growth factor receptor signaling pathway; mammary gland alveolus development; negative regulation of neuron apoptosis; neuroprotection; positive regulation of cell division; positive regulation of epidermal growth factor receptor activity; positive regulation of epithelial cell proliferation; p…	rno04012:ErbB signaling pathway; rno05200:Pathways in cancer; rno05211:Renal cell carcinoma; rno05212:Pancreatic cancer; rno05214:Glioma; rno05215:Prostate cancer; rno05223:Non-small cell lung cancer	1
ENSRNOG00000016280	Btrc	beta-transducin repeat containing	branching involved in mammary gland duct morphogenesis; mammary gland epithelial cell proliferation; protein catabolic process; regulation of cell cycle	rno04114:Oocyte meiosis; rno04120:Ubiquitin mediated proteolysis; rno04310:Wnt signaling pathway; rno04340:Hedgehog signaling pathway	1
ENSRNOG00000016298	Lysmd3	LysM, putative peptidoglycan-binding, domain containing 3; lysM and putative peptidoglycan-binding domain-containing protein 3-like	cell wall macromolecule catabolic process		1
ENSRNOG00000016322	Camk2n1	calcium/calmodulin-dependent protein kinase II inhibitor 1	synaptic transmission		1
ENSRNOG00000016325	F2	coagulation factor II (thrombin)	acute-phase response; blood coagulation; cell surface receptor linked signal transduction; cytosolic calcium ion homeostasis; platelet activation; positive regulation of collagen biosynthetic process; positive regulation of protein amino acid phosphorylation; positive regulation of release of sequestered calcium ion into cytosol; proteolysis; response to stress; response to wounding	rno04080:Neuroactive ligand-receptor interaction; rno04610:Complement and coagulation cascades; rno04810:Regulation of actin cytoskeleton	1
ENSRNOG00000016327	Mcee	methylmalonyl CoA epimerase		rno00280:Valine, leucine and isoleucine degradation; rno00640:Propanoate metabolism	1
ENSRNOG00000016337	Slc22a1	solute carrier family 22 (organic cation transporter), member 1	cation transport; dopamine transport; ion transport; quaternary ammonium group transport; transmembrane transport; transport		1
ENSRNOG00000016349	Gnmt	glycine N-methyltransferase	S-adenosylhomocysteine metabolic process; S-adenosylmethionine metabolic process; glycogen metabolic process; metabolic process; one-carbon metabolic process; protein homotetramerization	rno00260:Glycine, serine and threonine metabolism	1
ENSRNOG00000016374	Fgfr2	fibroblast growth factor receptor 2	angiogenesis; bone mineralization; bone morphogenesis; branching involved in embryonic placenta morphogenesis; cell fate commitment; cell-cell signaling; embryonic digestive tract morphogenesis; embryonic organ morphogenesis; embryonic pattern specification; embryonic placenta development; epithelial cell differentiation; epithelial cell proliferation involved in salivary gland morphogenesis; epi…	rno04010:MAPK signaling pathway; rno04144:Endocytosis; rno04810:Regulation of actin cytoskeleton; rno05200:Pathways in cancer; rno05215:Prostate cancer	1
ENSRNOG00000016437	Tm4sf4	transmembrane 4 L six family member 4	tissue regeneration		1
ENSRNOG00000016463	Prl2a1	Prolactin family 2, subfamily a, member 1			1
ENSRNOG00000016484	Gstk1	glutathione S-transferase kappa 1	glutathione metabolic process	rno00480:Glutathione metabolism; rno00980:Metabolism of xenobiotics by cytochrome P450; rno00982:Drug metabolism	1
ENSRNOG00000016508	Palmd	palmdelphin	regulation of cell shape		1
ENSRNOG00000016511	Pitrm1	pitrilysin metallopeptidase 1	nucleotide-excision repair; proteasomal ubiquitin-dependent protein catabolic process; proteolysis		1
ENSRNOG00000016576	Lrrc16a	leucine rich repeat containing 16A			1
ENSRNOG00000016645	Sfmbt1	Scm-like with four mbt domains 1	regulation of transcription		1
ENSRNOG00000016691	RGD1306809	similar to hypothetical protein FLJ30596	metabolic process		1
ENSRNOG00000016728	Tiam2	T-cell lymphoma invasion and metastasis 2	intracellular signaling cascade; regulation of Rho protein signal transduction; signal transduction		1
ENSRNOG00000016754	Bcs1l	BCS1-like (yeast)	mitochondrial respiratory chain complex I assembly; mitochondrion organization		1
ENSRNOG00000016807	Oat	ornithine aminotransferase (gyrate atrophy)		rno00330:Arginine and proline metabolism	1
ENSRNOG00000016906	RGD1305211	lipoyl(octanoyl) transferase 2 (putative)	protein modification process	rno00785:Lipoic acid metabolism	1
ENSRNOG00000016920	Spire2	spire homolog 2 (Drosophila)		rno04320:Dorso-ventral axis formation	1
ENSRNOG00000016942	Wdr48	WD repeat domain 48	protein deubiquitination		1
ENSRNOG00000016950	Otud1	OTU domain containing 1			1
ENSRNOG00000017054	Kcne3	potassium voltage-gated channel, Isk-related family, member 3	ion transport		1
ENSRNOG00000017073	Car9	carbonic anhydrase 9	morphogenesis of an epithelium; one-carbon metabolic process; response to drug; response to hypoxia; response to testosterone stimulus; secretion	rno00910:Nitrogen metabolism	1
ENSRNOG00000017233	Mmachc	methylmalonic aciduria (cobalamin deficiency) cblC type, with homocystinuria			1
ENSRNOG00000017250	Gmpr	guanosine monophosphate reductase	nucleotide metabolic process; oxidation reduction; response to cold	rno00230:Purine metabolism	1
ENSRNOG00000017355	Capsl	calcyphosine-like			1
ENSRNOG00000017372	Higd2a	HIG1 hypoxia inducible domain family, member 2A			1
ENSRNOG00000017446	Ndufs8	NADH dehydrogenase (ubiquinone) Fe-S protein 8	mitochondrial respiratory chain complex I assembly; oxidation reduction; response to oxidative stress	rno00190:Oxidative phosphorylation; rno05010:Alzheimer's disease; rno05012:Parkinson's disease; rno05016:Huntington's disease	1
ENSRNOG00000017494	Acp6	acid phosphatase 6, lysophosphatidic		rno00740:Riboflavin metabolism	1
ENSRNOG00000017601	Srd5a1	steroid-5-alpha-reductase, alpha polypeptide 1 (3-oxo-5 alpha-steroid delta 4-dehydrogenase alpha 1)	cell differentiation; lipid metabolic process; oxidation reduction; response to drug; steroid metabolic process	rno00140:Steroid hormone biosynthesis	1
ENSRNOG00000017602	Il34	interleukin 34	positive regulation of cell proliferation; positive regulation of protein amino acid phosphorylation		1
ENSRNOG00000017637	Fbp2	fructose-1,6-bisphosphatase 2	carbohydrate metabolic process; gluconeogenesis	rno00010:Glycolysis / Gluconeogenesis; rno00030:Pentose phosphate pathway; rno00051:Fructose and mannose metabolism; rno04910:Insulin signaling pathway	1
ENSRNOG00000017672	Akr1c14	aldo-keto reductase family 1, member C14	oxidation reduction; steroid metabolic process		1
ENSRNOG00000017680	Dennd2d	DENN/MADD domain containing 2D			1
ENSRNOG00000017689	Itih3	inter-alpha trypsin inhibitor, heavy chain 3	hyaluronan metabolic process		1
ENSRNOG00000017718	Tmco6	transmembrane and coiled-coil domains 6	intracellular protein transport; protein import into nucleus		1
ENSRNOG00000017765	Net1	neuroepithelial cell transforming 1	intracellular signaling cascade; regulation of Rho protein signal transduction		1
ENSRNOG00000017780	Akr7a2	aldo-keto reductase family 7, member A2 (aflatoxin aldehyde reductase)	oxidation reduction		1
ENSRNOG00000017856	Fev	FEV (ETS oncogene family)	cell differentiation; multicellular organismal development; nervous system development; positive regulation of transcription		1
ENSRNOG00000017873	Sct	secretin			1
ENSRNOG00000017953	Gfod2	glucose-fructose oxidoreductase domain containing 2	extracellular matrix organization; metabolic process; oxidation reduction		1
ENSRNOG00000017955	Nudt8	nudix (nucleoside diphosphate linked moiety X)-type motif 8; similar to nudix-type motif 8			1
ENSRNOG00000017965	Afg3l2	AFG3(ATPase family gene 3)-like 2 (yeast)	axonogenesis; death; muscle fiber development; myelination; neuromuscular junction development; protein catabolic process; proteolysis; regulation of multicellular organism growth		1
ENSRNOG00000017996	Cryba2	crystallin, beta A2			1
ENSRNOG00000018095	Nkiras2	NFKB inhibitor interacting Ras-like 2	protein transport; small GTPase mediated signal transduction		1
ENSRNOG00000018106	Neu3	sialidase 3 (membrane sialidase)	carbohydrate metabolic process; metabolic process	rno00511:Other glycan degradation; rno00600:Sphingolipid metabolism	1
ENSRNOG00000018152	Ptprh	protein tyrosine phosphatase, receptor type, H	dephosphorylation; protein amino acid dephosphorylation		1
ENSRNOG00000018276	RGD1560408	mannosyl (alpha-1,3-)-glycoprotein beta-1,4-N-acetylglucosaminyltransferase, isozyme A	carbohydrate metabolic process	rno00510:N-Glycan biosynthesis	1
ENSRNOG00000018281	Uqcrfs1	ubiquinol-cytochrome c reductase, Rieske iron-sulfur polypeptide 1	electron transport chain; oxidation reduction; response to antibiotic; response to drug; response to hormone stimulus; transport	rno00190:Oxidative phosphorylation; rno04260:Cardiac muscle contraction; rno05010:Alzheimer's disease; rno05012:Parkinson's disease; rno05016:Huntington's disease	1
ENSRNOG00000018326	Pgls	6-phosphogluconolactonase	carbohydrate metabolic process; pentose-phosphate shunt	rno00030:Pentose phosphate pathway	1
ENSRNOG00000018327	Fank1	fibronectin type 3 and ankyrin repeat domains 1			1
ENSRNOG00000018351	Thap4	THAP domain containing 4			1
ENSRNOG00000018415	Them2	acyl-CoA thioesterase 13	protein homotetramerization		1
ENSRNOG00000018425	Dym	dymeclin			1
ENSRNOG00000018491	B0BMY5_RAT	coiled-coil-helix-coiled-coil-helix domain containing 5			1
ENSRNOG00000018505	Cidea	cell death-inducing DFFA-like effector a	DNA fragmentation involved in apoptosis; apoptosis; cell death; lipid metabolic process; lipid storage; negative regulation of apoptosis; negative regulation of lipid catabolic process; negative regulation of transforming growth factor beta receptor signaling pathway; temperature homeostasis		1
ENSRNOG00000018536	Pck2	phosphoenolpyruvate carboxykinase 2 (mitochondrial)	gluconeogenesis	rno00010:Glycolysis / Gluconeogenesis; rno00020:Citrate cycle (TCA cycle); rno00620:Pyruvate metabolism; rno03320:PPAR signaling pathway; rno04910:Insulin signaling pathway; rno04920:Adipocytokine signaling pathway	1
ENSRNOG00000018653	Pfdn1	prefoldin subunit 1	protein folding		1
ENSRNOG00000018680	Rpl17	ribosomal protein L17, pseudogene 1; ribosomal protein L17; similar to 60S ribosomal protein L17 (L23) (Amino acid starvation-induced protein) (ASI)	translation	rno03010:Ribosome	1
ENSRNOG00000018693	Asgr1	asialoglycoprotein receptor 1	cellular response to extracellular stimulus; endocytosis		1
ENSRNOG00000018711	Ppcdc	phosphopantothenoylcysteine decarboxylase		rno00770:Pantothenate and CoA biosynthesis	1
ENSRNOG00000018736	Pnpla2	patatin-like phospholipase domain containing 2	lipid catabolic process; lipid metabolic process; metabolic process; positive regulation of triglyceride catabolic process		1
ENSRNOG00000018748	B5DFC0_RAT	solute carrier family 16 (monocarboxylic acid transporters), member 11	transmembrane transport		1
ENSRNOG00000018775	LOC682888	hypothetical protein LOC100363310			1
ENSRNOG00000018791	Dnlz	DNL-type zinc finger			1
ENSRNOG00000018792	Tekt4	tektin 4	cell projection organization; microtubule cytoskeleton organization		1
ENSRNOG00000018812	Rpp25	ribonuclease P 25 subunit (human)	tRNA processing		1
ENSRNOG00000018816	Cox5a	Cytochrome c oxidase subunit 5A, mitochondrial-like; "cytochrome c oxidase, subunit Va"		rno00190:Oxidative phosphorylation; rno04260:Cardiac muscle contraction; rno05010:Alzheimer's disease; rno05012:Parkinson's disease; rno05016:Huntington's disease	1
ENSRNOG00000018838	LOC293589	putative GTP-binding protein			1
ENSRNOG00000018916	Bcl7c	B-cell CLL/lymphoma 7C			1
ENSRNOG00000018944	Pank1	pantothenate kinase 1	coenzyme A biosynthetic process	rno00770:Pantothenate and CoA biosynthesis	1
ENSRNOG00000019000	Limk2	LIM domain kinase 2	protein amino acid phosphorylation; spermatid development; spermatogenesis	rno04360:Axon guidance; rno04666:Fc gamma R-mediated phagocytosis; rno04810:Regulation of actin cytoskeleton	1
ENSRNOG00000019046	Reg4	regenerating islet-derived family, member 4			1
ENSRNOG00000019179	Q8K3Z1_RAT	glycoprotein, alpha-galactosyltransferase 1	carbohydrate metabolic process	rno00601:Glycosphingolipid biosynthesis	1
ENSRNOG00000019206	Nupr1	nuclear protein, transcriptional regulator, 1	DNA damage response, signal transduction by p53 class mediator resulting in induction of apoptosis; acute inflammatory response; negative regulation of fibroblast proliferation; positive regulation of apoptosis; response to toxin		1
ENSRNOG00000019221	Gstm4	glutathione S-transferase mu 4	metabolic process	rno00480:Glutathione metabolism; rno00980:Metabolism of xenobiotics by cytochrome P450; rno00982:Drug metabolism	1
ENSRNOG00000019245	Ccdc101	coiled-coil domain containing 101	regulation of transcription		1
ENSRNOG00000019272	Gkap1	G kinase anchoring protein 1	signal transduction		1
ENSRNOG00000019332	Gtpbp2	GTP binding protein 2			1
ENSRNOG00000019342	Sult1a1	sulfotransferase family, cytosolic, 1A, phenol-preferring, member 1	drug metabolic process; lipid metabolic process; regulation of blood pressure; response to chemical stimulus; response to glucocorticoid stimulus; response to stress; xenobiotic metabolic process	rno00920:Sulfur metabolism	1
ENSRNOG00000019428	Higd1a	HIG1 hypoxia inducible domain family, member 1A			1
ENSRNOG00000019482	Gnao1	guanine nucleotide binding protein (G protein), alpha activating activity polypeptide O	aging; cellular process; dopamine receptor signaling pathway; forebrain development; locomotory behavior; neuron projection development; positive regulation of GTPase activity; regulation of heart contraction; response to cytokine stimulus; response to drug; response to hydrogen peroxide; response to morphine; response to organic cyclic substance; response to organic nitrogen; signal transduction…	rno04730:Long-term depression; rno04916:Melanogenesis	1
ENSRNOG00000019553	Ipo4	importin 4	intracellular protein transport; lipid catabolic process; phospholipid metabolic process		1
ENSRNOG00000019555	Centd2	ArfGAP with RhoGAP domain, ankyrin repeat and PH domain 1	positive regulation of filopodium assembly; regulation of ARF GTPase activity; regulation of cell shape; signal transduction	rno04144:Endocytosis	1
ENSRNOG00000019560	Pde2a	phosphodiesterase 2A, cGMP-stimulated	cAMP catabolic process; cGMP catabolic process; signal transduction	rno00230:Purine metabolism	1
ENSRNOG00000019601	Mapk3	mitogen activated protein kinase 3	cell cycle; positive regulation of transcription; positive regulation of translation; protein amino acid phosphorylation; protein complex assembly	rno04010:MAPK signaling pathway; rno04012:ErbB signaling pathway; rno04062:Chemokine signaling pathway; rno04114:Oocyte meiosis; rno04150:mTOR signaling pathway; rno04270:Vascular smooth muscle contraction; rno04320:Dorso-ventral axis formation; rno04350:TGF-beta signaling pathway; rno04360:Axon guidance; rno04370:VEGF signaling pathway; rno04510:Focal adhesion; rno04520:Adherens junction; rno045…	1
ENSRNOG00000019630	Hacl1	2-hydroxyacyl-CoA lyase 1	lipid metabolic process		1
ENSRNOG00000019675	Pycard	PYD and CARD domain containing	activation of caspase activity; induction of apoptosis; inflammatory response; positive regulation of interleukin-1 beta secretion; proteolysis; regulation of apoptosis	rno04621:NOD-like receptor signaling pathway; rno04623:Cytosolic DNA-sensing pathway	1
ENSRNOG00000019710	TM9S1_RAT	transmembrane 9 superfamily member 1	autophagy		1
ENSRNOG00000019716	Ntf3	neurotrophin 3	axon guidance; brain development; enteric nervous system development; epidermis development; generation of neurons; mechanoreceptor differentiation; myelination; neuromuscular synaptic transmission; neuron development; peripheral nervous system development; positive regulation of transcription from RNA polymerase II promoter; regulation of synaptic transmission; smooth muscle cell differentiation	rno04010:MAPK signaling pathway; rno04722:Neurotrophin signaling pathway	1
ENSRNOG00000019760	Oxnad1	oxidoreductase NAD-binding domain containing 1	oxidation reduction		1
ENSRNOG00000019840	Mdp-1	magnesium-dependent phosphatase 1			1
ENSRNOG00000019854	Napsa	napsin A aspartic peptidase	proteolysis	rno04142:Lysosome	1
ENSRNOG00000019887	Rab17	RAB17, member RAS oncogene family	intracellular protein transport; nucleocytoplasmic transport; protein transport; signal transduction; small GTPase mediated signal transduction		1
ENSRNOG00000019908	Robld3	roadblock domain containing 3	activation of MAPKK activity		1
ENSRNOG00000019926	Ramp1	receptor (G protein-coupled) activity modifying protein 1	intracellular protein transport; regulation of G-protein coupled receptor protein signaling pathway; transport	rno04270:Vascular smooth muscle contraction	1
ENSRNOG00000019938	Slc23a1	solute carrier family 23 (nucleobase transporters), member 1	brain development; ion transport; lung development; sodium ion transport; transmembrane transport; transport		1
ENSRNOG00000020029	LOC685545	similar to RIKEN cDNA 9530058B02			1
ENSRNOG00000020060	Atf5	activating transcription factor 5	anti-apoptosis; negative regulation of astrocyte differentiation; negative regulation of neurogenesis; regulation of transcription from RNA polymerase II promoter		1
ENSRNOG00000020068	Ndufaf3	NADH dehydrogenase (ubiquinone) 1 alpha subcomplex, assembly factor 3	mitochondrial respiratory chain complex I assembly		1
ENSRNOG00000020075	Eef1g	eukaryotic translation elongation factor 1 gamma	translational elongation		1
ENSRNOG00000020081	As3mt	arsenic (+3 oxidation state) methyltransferase	metabolic process; response to arsenic; toxin metabolic process		1
ENSRNOG00000020083	Scly	selenocysteine lyase	metabolic process	rno00450:Selenoamino acid metabolism	1
ENSRNOG00000020124	Lrrc51	leucine rich repeat containing 51			1
ENSRNOG00000020250	Pcgf6	polycomb group ring finger 6	regulation of transcription		1
ENSRNOG00000020289	Akt1s1	AKT1 substrate 1 (proline-rich)	negative regulation of cell size; negative regulation of protein kinase activity; neuroprotection		1
ENSRNOG00000020470	Slc25a24	solute carrier family 25 (mitochondrial carrier, phosphate carrier), member 24	transmembrane transport; transport		1
ENSRNOG00000020487	Ccdc56	coiled-coil domain containing 56			1
ENSRNOG00000020562	S22AI_RAT	solute carrier family 22, member 18	drug transport; ion transport; response to antibiotic; transmembrane transport		1
ENSRNOG00000020565	Ccdc85b	coiled-coil domain containing 85B	negative regulation of cell growth; negative regulation of transcription		1
ENSRNOG00000020571	Mpg	N-methylpurine-DNA glycosylase	base-excision repair; response to DNA damage stimulus	rno03410:Base excision repair	1
ENSRNOG00000020594	Rhbdf1	rhomboid 5 homolog 1 (Drosophila)			1
ENSRNOG00000020623	Aldh16a1	aldehyde dehydrogenase 16 family, member A1	metabolic process; oxidation reduction		1
ENSRNOG00000020656	Pfkfb4	6-phosphofructo-2-kinase/fructose-2,6-biphosphatase 4	fructose 2,6-bisphosphate metabolic process; fructose metabolic process; metabolic process	rno00051:Fructose and mannose metabolism	1
ENSRNOG00000020719	Hrc	histidine rich calcium binding protein	regulation of heart contraction		1
ENSRNOG00000020721	Nme6	non-metastatic cells 6, protein expressed in (nucleoside-diphosphate kinase)	CTP biosynthetic process; GTP biosynthetic process; UTP biosynthetic process; nucleotide metabolic process	rno00230:Purine metabolism; rno00240:Pyrimidine metabolism	1
ENSRNOG00000020736	Nadsyn1	NAD synthetase 1	NAD biosynthetic process; nitrogen compound metabolic process	rno00760:Nicotinate and nicotinamide metabolism	1
ENSRNOG00000020829	Them4	thioesterase superfamily member 4			1
ENSRNOG00000020830	RGD1304580	similar to Hypothetical protein MGC38513			1
ENSRNOG00000020847	Tmem103	transmembrane protein 103			1
ENSRNOG00000020851	B1WBV6_RAT	amyloid beta (A4) precursor-like protein 1			1
ENSRNOG00000020853	Scap	SREBF chaperone	aging; cholesterol metabolic process; lipid metabolic process; regulation of cholesterol biosynthetic process; regulation of fatty acid metabolic process; response to hypoxia; response to insulin stimulus; steroid metabolic process		1
ENSRNOG00000020879	Nags	N-acetylglutamate synthase	cellular amino acid biosynthetic process; glutamate metabolic process; metabolic process	rno00330:Arginine and proline metabolism	1
ENSRNOG00000020904	Cdc42ep2	CDC42 effector protein (Rho GTPase binding) 2	positive regulation of actin filament polymerization; positive regulation of pseudopodium assembly; regulation of cell shape		1
ENSRNOG00000020992	Selenbp1	selenium binding protein 1	protein transport		1
ENSRNOG00000021010	Arl2	ADP-ribosylation factor-like 2	cell cycle; intracellular protein transport; protein transport; small GTPase mediated signal transduction		1
ENSRNOG00000021046	Sult2b1	sulfotransferase family, cytosolic, 2B, member 1	lipid metabolic process; steroid metabolic process		1
ENSRNOG00000021047	Lrrfip2	leucine rich repeat (in FLII) interacting protein 2	Wnt receptor signaling pathway		1
ENSRNOG00000021087	Lgi4	leucine-rich repeat LGI family, member 4	adult locomotory behavior; myelination; neuron maturation		1
ENSRNOG00000021106	Gramd1a	GRAM domain containing 1A			1
ENSRNOG00000021118	Nomo1	nodal modulator 1			1
ENSRNOG00000021130	ABCC8_RAT	ATP-binding cassette, subfamily C (CFTR/MRP), member 8	negative regulation of insulin secretion; positive regulation of potassium ion transport; response to drug; response to insulin stimulus; response to lipopolysaccharide; response to pH; response to zinc ion; transmembrane transport; transport	rno02010:ABC transporters; rno04930:Type II diabetes mellitus	1
ENSRNOG00000021149	Ush1c	Usher syndrome 1C homolog (human)	auditory receptor cell differentiation; inner ear morphogenesis; neuromuscular process controlling balance; regulation of synapse structure and activity; sensory perception of sound		1
ENSRNOG00000021223	Ptpra	protein tyrosine phosphatase, receptor type, A	dephosphorylation; insulin receptor signaling pathway; protein amino acid dephosphorylation; protein amino acid phosphorylation		1
ENSRNOG00000021269	Chgb	chromogranin B			1
ENSRNOG00000021323	Car13	carbonic anhydrase 13; similar to carbonic anhydrase 13	one-carbon metabolic process	rno00910:Nitrogen metabolism	1
ENSRNOG00000021390	Meis3	Meis homeobox 3	transport		1
ENSRNOG00000021392	Noc2l	nucleolar complex associated 2 homolog (S. cerevisiae)			1
ENSRNOG00000021433	B0BN40_RAT	similar to hypothetical protein FLJ14642	regulation of Rho protein signal transduction		1
ENSRNOG00000021463	Ppara	peroxisome proliferator activated receptor alpha	epidermis development; lipoprotein metabolic process; negative regulation of appetite; negative regulation of blood pressure; negative regulation of gene-specific transcription from RNA polymerase II promoter; negative regulation of macrophage derived foam cell differentiation; positive regulation of fatty acid oxidation; positive regulation of transcription; positive regulation of transcription …	rno03320:PPAR signaling pathway; rno04920:Adipocytokine signaling pathway	1
ENSRNOG00000021518	Trim31	tripartite motif-containing 31	protein ubiquitination		1
ENSRNOG00000021611	Clip2	CAP-GLY domain containing linker protein 2	negative regulation of microtubule depolymerization; vesicle-mediated transport		1
ENSRNOG00000021655	Pddc1	Parkinson disease 7 domain containing 1			1
ENSRNOG00000022067	Tlr5	toll-like receptor 5	defense response to bacterium; innate immune response; microglial cell activation during immune response; pathogen-associated molecular pattern dependent induction by symbiont of host innate immunity; positive regulation of interleukin-8 production; response to molecule of bacterial origin; signal transduction; toll-like receptor signaling pathway	rno04620:Toll-like receptor signaling pathway	1
ENSRNOG00000022153	Tmem134	transmembrane protein 134	protein amino acid phosphorylation		1
ENSRNOG00000022237		similar to GTPase activating RANGAP domain-like 3			1
ENSRNOG00000022298	Cxcl11	chemokine (C-X-C motif) ligand 11	immune response	rno04060:Cytokine-cytokine receptor interaction; rno04062:Chemokine signaling pathway; rno04620:Toll-like receptor signaling pathway	1
ENSRNOG00000022523	Fkbp5	FK506 binding protein 5	protein folding		1
ENSRNOG00000022555	LOC497899	similar to hypothetical protein 4930503F14	transport		1
ENSRNOG00000022727	Tmem127	similar to RIKEN cDNA 2310003P10; transmembrane protein 127			1
ENSRNOG00000022950	Dppa3	developmental pluripotency-associated 3; similar to STELLA			1
ENSRNOG00000022953	LOC298442	coiled-coil domain containing 163	regulation of transcription		1
ENSRNOG00000022999	Ppp2r3a	protein phosphatase 2, regulatory subunit B'', alpha			1
ENSRNOG00000023020	Fdx1l	ferredoxin 1-like			1
ENSRNOG00000023129	Mfsd9	major facilitator superfamily domain containing 9	transmembrane transport		1
ENSRNOG00000023130	Lyplal1	lysophospholipase-like 1			1
ENSRNOG00000023208	RGD1309821	similar to KIAA1161 protein	carbohydrate metabolic process		1
ENSRNOG00000023261	Ube2q2l	ubiquitin-conjugating enzyme E2Q family member 2-like	post-translational protein modification; regulation of protein metabolic process	rno04120:Ubiquitin mediated proteolysis	1
ENSRNOG00000023628	Tmem106a	transmembrane protein 106A			1
ENSRNOG00000023842	Pigg	phosphatidylinositol glycan anchor biosynthesis, class G	metabolic process	rno00563:Glycosylphosphatidylinositol(GPI)-anchor biosynthesis	1
ENSRNOG00000024066	Fundc2	FUN14 domain containing 2			1
ENSRNOG00000024259	Tmem54	transmembrane protein 54			1
ENSRNOG00000024291	Tex9	testis expressed gene 9			1
ENSRNOG00000024411	Cbr4	carbonyl reductase 4	fatty acid biosynthetic process; metabolic process; oxidation reduction; protein homotetramerization		1
ENSRNOG00000024492	RGD1311435	adaptor-related protein complex 1 associated regulatory protein			1
ENSRNOG00000024568	Ndufs7	NADH dehydrogenase (ubiquinone) Fe-S protein 7	oxidation reduction	rno00190:Oxidative phosphorylation; rno05010:Alzheimer's disease; rno05012:Parkinson's disease; rno05016:Huntington's disease	1
ENSRNOG00000024839	Tysnd1	trypsin domain containing 1	proteolysis		1
ENSRNOG00000025140	Zfat	zinc finger and AT hook domain containing	DNA repair		1
ENSRNOG00000025181	Cdc91l1	phosphatidylinositol glycan anchor biosynthesis, class U	GPI anchor biosynthetic process	rno00563:Glycosylphosphatidylinositol(GPI)-anchor biosynthesis	1
ENSRNOG00000025216	Alkbh6	alkB, alkylation repair homolog 6 (E. coli)			1
ENSRNOG00000025252	Yars2	tyrosyl-tRNA synthetase 2 (mitochondrial)	tRNA aminoacylation for protein translation; translation	rno00970:Aminoacyl-tRNA biosynthesis	1
ENSRNOG00000025295	Visa	mitochondrial antiviral signaling protein	defense response to bacterium; innate immune response; positive regulation of I-kappaB kinase/NF-kappaB cascade; positive regulation of interferon-beta production; response to virus	rno04622:RIG-I-like receptor signaling pathway; rno04623:Cytosolic DNA-sensing pathway	1
ENSRNOG00000025353	LOC685245	glutamyl-tRNA synthetase 2 mitochondrial (putative)	tRNA aminoacylation for protein translation; translation	rno00860:Porphyrin and chlorophyll metabolism; rno00970:Aminoacyl-tRNA biosynthesis	1
ENSRNOG00000025383	Pdha1	pyruvate dehydrogenase (lipoamide) alpha 1	acetyl-CoA biosynthetic process from pyruvate; glycolysis; metabolic process; oxidation reduction	rno00010:Glycolysis / Gluconeogenesis; rno00020:Citrate cycle (TCA cycle); rno00290:Valine, leucine and isoleucine biosynthesis; rno00620:Pyruvate metabolism; rno00650:Butanoate metabolism	1
ENSRNOG00000025484	Tmem177	transmembrane protein 177			1
ENSRNOG00000025711	LOC499770	similar to LOC495800 protein			1
ENSRNOG00000026114	RGD1562657	similar to hypothetical protein DKFZp761E198			1
ENSRNOG00000026644	Glipr1	GLI pathogenesis-related 1			1
ENSRNOG00000026691	Coq4	coenzyme Q4 homolog (S. cerevisiae)	ubiquinone biosynthetic process		1
ENSRNOG00000026821	9030420J04Rik	Rho GTPase activating protein 42	signal transduction		1
ENSRNOG00000027017	Rnasel	ribonuclease L (2',5'-oligoisoadenylate synthetase-dependent)	mRNA processing; oxidation reduction; protein amino acid phosphorylation; rRNA processing		1
ENSRNOG00000027498	Engase	endo-beta-N-acetylglucosaminidase		rno00511:Other glycan degradation	1
ENSRNOG00000027592	Rerg	RAS-like, estrogen-regulated, growth-inhibitor	negative regulation of cell growth; negative regulation of cell proliferation; protein transport; response to hormone stimulus; small GTPase mediated signal transduction		1
ENSRNOG00000027818	Znhit3	zinc finger, HIT type 3			1
ENSRNOG00000027821	Lcn9	lipocalin 9	transport		1
ENSRNOG00000027857	Pigw	phosphatidylinositol glycan anchor biosynthesis, class W	GPI anchor biosynthetic process	rno00563:Glycosylphosphatidylinositol(GPI)-anchor biosynthesis	1
ENSRNOG00000028216	LOC304000	cell adhesion molecule JCAM		rno04530:Tight junction	1
ENSRNOG00000028384	Npepl1	aminopeptidase-like 1	proteolysis		1
ENSRNOG00000028557	Hibch	3-hydroxyisobutyryl-Coenzyme A hydrolase	branched chain family amino acid catabolic process; metabolic process	rno00280:Valine, leucine and isoleucine degradation; rno00410:beta-Alanine metabolism; rno00640:Propanoate metabolism	1
ENSRNOG00000028569	Arhgap27	Rho GTPase activating protein 27	receptor-mediated endocytosis; signal transduction		1
ENSRNOG00000028581	RGD1566050	similar to hypothetical protein FLJ32745			1
ENSRNOG00000028624	Kif26b	kinesin family member 26B	microtubule-based movement		1
ENSRNOG00000028632	Bcl2l14	Bcl2-like 14 (apoptosis facilitator)	regulation of apoptosis		1
ENSRNOG00000028638	Il10rb	interleukin 10 receptor, beta	blood coagulation	rno04060:Cytokine-cytokine receptor interaction; rno04630:Jak-STAT signaling pathway	1
ENSRNOG00000028649	Tox3	TOX high mobility group box family member 3			1
ENSRNOG00000028701	C8g	complement component 8, gamma polypeptide		rno04610:Complement and coagulation cascades; rno05020:Prion diseases; rno05322:Systemic lupus erythematosus	1
ENSRNOG00000028746	Gsto1	glutathione S-transferase omega 1	metabolic process	rno00480:Glutathione metabolism; rno00980:Metabolism of xenobiotics by cytochrome P450; rno00982:Drug metabolism	1
ENSRNOG00000028750	Tubal3	tubulin, alpha-like 3	microtubule-based movement; microtubule-based process; protein polymerization	rno04540:Gap junction	1
ENSRNOG00000028781	Abcc6	ATP-binding cassette, subfamily C (CFTR/MRP), member 6	ATP catabolic process; transmembrane transport; transport	rno02010:ABC transporters	1
ENSRNOG00000028810	Gzmf	granzyme F	proteolysis		1
ENSRNOG00000028843	Ggct	gamma-glutamyl cyclotransferase; gamma-glutamyl cyclotransferase-like 1		rno00480:Glutathione metabolism	1
ENSRNOG00000028889	Ostbeta	organic solute transporter beta	transport		1
ENSRNOG00000029127	Parp16	poly (ADP-ribose) polymerase family, member 16			1
ENSRNOG00000029133	Aes	amino-terminal enhancer of split	Wnt receptor signaling pathway; cellular response to extracellular stimulus; negative regulation of transcription; regulation of growth; regulation of transcription; regulation of transcription from RNA polymerase II promoter; skeletal system development		1
ENSRNOG00000029197	Diablo	diablo homolog (Drosophila)	activation of caspase activity; induction of apoptosis		1
ENSRNOG00000029370	Abhd3	abhydrolase domain containing 3			1
ENSRNOG00000029528	Cbs	cystathionine beta synthase	cellular amino acid biosynthetic process; endochondral ossification; metabolic process; response to folic acid; response to nutrient levels	rno00260:Glycine, serine and threonine metabolism; rno00270:Cysteine and methionine metabolism; rno00450:Selenoamino acid metabolism	1
ENSRNOG00000029711	GSTA5_RAT	glutathione S-transferase Yc2 subunit	metabolic process; response to drug; xenobiotic catabolic process	rno00480:Glutathione metabolism; rno00980:Metabolism of xenobiotics by cytochrome P450; rno00982:Drug metabolism	1
ENSRNOG00000029740	Tmem20	transmembrane protein 20			1
ENSRNOG00000030018	Gzmc	granzyme C; similar to granzyme C	proteolysis		1
ENSRNOG00000030225	Clpx	ClpX caseinolytic peptidase X homolog (E. coli)	protein folding; proteolysis involved in cellular protein catabolic process		1
ENSRNOG00000030334	Adck5	aarF domain containing kinase 5	carbohydrate metabolic process; protein amino acid phosphorylation		1
ENSRNOG00000030345	RS20_RAT	ribosomal protein S20; ribosomal protein S20-like; similar to 40S ribosomal protein S20	translation	rno03010:Ribosome	1
ENSRNOG00000030443	Rab9a	RAB9A, member RAS oncogene family	bone resorption; intracellular protein transport; nucleocytoplasmic transport; protein transport; signal transduction; small GTPase mediated signal transduction		1
ENSRNOG00000030718	Smagp	small trans-membrane and glycosylated protein			1
ENSRNOG00000031038	Gtdc1	glycosyltransferase-like domain containing 1	biosynthetic process		1
ENSRNOG00000031233	Mapk12	mitogen-activated protein kinase 12	glycogen biosynthetic process; myoblast differentiation; protein amino acid phosphorylation	rno04010:MAPK signaling pathway; rno04114:Oocyte meiosis; rno04370:VEGF signaling pathway; rno04620:Toll-like receptor signaling pathway; rno04621:NOD-like receptor signaling pathway; rno04622:RIG-I-like receptor signaling pathway; rno04660:T cell receptor signaling pathway; rno04664:Fc epsilon RI signaling pathway; rno04670:Leukocyte transendothelial migration; rno04722:Neurotrophin signaling pa…	1
ENSRNOG00000031653	Ccdc58	coiled-coil domain containing 58			1
ENSRNOG00000031656	Ccnh	cyclin H	cell cycle; positive regulation of transcription from RNA polymerase II promoter; regulation of transcription	rno03420:Nucleotide excision repair; rno04110:Cell cycle	1
ENSRNOG00000031748	KIFC2	kinesin family member C2	microtubule-based movement		1
ENSRNOG00000031833	Sult1c2	sulfotransferase family, cytosolic, 1C, member 2; "sulfotransferase family, cytosolic, 1C, member 2a"			1
ENSRNOG00000031852	Lsamp	limbic system-associated membrane protein	cell adhesion		1
ENSRNOG00000031934	Enah	enabled homolog (Drosophila)	actin polymerization or depolymerization; axon guidance; intracellular transport; neural tube closure	rno04810:Regulation of actin cytoskeleton	1
ENSRNOG00000032183	Scmh1	sex comb on midleg homolog 1 (Drosophila)	regulation of transcription		1
ENSRNOG00000032439	Rsl1d1	ribosomal L1 domain containing 1	RNA processing; regulation of protein localization		1
ENSRNOG00000032508	Acot5	acyl-CoA thioesterase 5	acyl-CoA metabolic process; lipid metabolic process		1
ENSRNOG00000032759	Cdx2	caudal type homeo box 2	anterior/posterior pattern formation; blastocyst development; blood vessel development; labyrinthine layer development; multicellular organismal development; negative regulation of transcription from RNA polymerase II promoter; pattern specification process; placenta development; positive regulation of cell differentiation; regulation of transcription; somatic stem cell maintenance; trophectoderm…		1
ENSRNOG00000032868	Gzmb	granzyme B	cytolysis; proteolysis	rno04650:Natural killer cell mediated cytotoxicity; rno04940:Type I diabetes mellitus; rno05320:Autoimmune thyroid disease; rno05330:Allograft rejection; rno05332:Graft-versus-host disease	1
ENSRNOG00000033234	Ccrl2	chemokine (C-C motif) receptor-like 2			1
ENSRNOG00000033262	Reep6	receptor accessory protein 6			1
ENSRNOG00000033316	Foxo4	forkhead box O4	positive regulation of transcription		1
ENSRNOG00000033361	Slc39a5	solute carrier family 39 (metal ion transporter), member 5	metal ion transport; transmembrane transport		1
ENSRNOG00000033434	Casp12	caspase 12	aging; apoptosis; endoplasmic reticulum unfolded protein response; positive regulation of apoptosis; positive regulation of caspase activity; protein autoprocessing; proteolysis; regulation of apoptosis; response to cold; response to drug; response to ethanol; response to inorganic substance; response to nicotine; response to organic nitrogen	rno04210:Apoptosis; rno05010:Alzheimer's disease; rno05014:Amyotrophic lateral sclerosis (ALS); rno05020:Prion diseases	1
ENSRNOG00000033680	Cyp2b1	cytochrome P450, family 2, subfamily b, polypeptide 1	drug metabolic process; oxidation reduction; response to calcium ion; response to drug; response to insulin stimulus; response to organic cyclic substance	rno00590:Arachidonic acid metabolism; rno00830:Retinol metabolism; rno00980:Metabolism of xenobiotics by cytochrome P450; rno00982:Drug metabolism	1
ENSRNOG00000033796	Kcnj5	potassium inwardly-rectifying channel, subfamily J, member 5	ion transport; potassium ion transport		1
ENSRNOG00000033887	Acot4	acyl-CoA thioesterase 3; acyl-CoA thioesterase 4	acyl-CoA metabolic process; lipid metabolic process; long-chain fatty acid metabolic process; very-long-chain fatty acid metabolic process	rno01040:Biosynthesis of unsaturated fatty acids	1
ENSRNOG00000033893	Cacna1h	calcium channel, voltage-dependent, T type, alpha 1H subunit	calcium ion transport; ion transport; transmembrane transport	rno04010:MAPK signaling pathway; rno04020:Calcium signaling pathway	1
ENSRNOG00000033915	Gpt	glutamic-pyruvate transaminase (alanine aminotransferase)	biosynthetic process	rno00250:Alanine, aspartate and glutamate metabolism	1
ENSRNOG00000036571	Ces2l	carboxylesterase 2C; carboxylesterase-like		rno00983:Drug metabolism	1
ENSRNOG00000036696	Hgs	hepatocyte growth factor-regulated tyrosine kinase substrate	intracellular protein transport	rno04144:Endocytosis	1
ENSRNOG00000036732	Gata5	GATA binding protein 5	positive regulation of transcription		1
ENSRNOG00000036760	Tmc5	transmembrane channel-like 5			1
ENSRNOG00000036894	Cisd3	CDGSH iron sulfur domain 3			1
ENSRNOG00000036918	MGC72974	hypothetical LOC316976	protein amino acid methylation		1
ENSRNOG00000037033	Ncrna00086	hypothetical protein LOC100360120			1
ENSRNOG00000037352	RGD1562747	similar to RIKEN cDNA 1110012L19			1
ENSRNOG00000037627	Trappc1	trafficking protein particle complex 1	ER to Golgi vesicle-mediated transport; transport; vesicle-mediated transport		1
ENSRNOG00000037664	Tbrg4	transforming growth factor beta regulator 4	apoptosis		1
ENSRNOG00000037897	Rps19	ribosomal protein S19; similar to 40S ribosomal protein S19	anatomical structure development; erythrocyte differentiation; translation	rno03010:Ribosome	1
ENSRNOG00000038330	RGD1359508	similar to protein C33A12.3			1
ENSRNOG00000039088	LOC685767	similar to Gene model 609; similar to OX-2 membrane glycoprotein precursor (MRC OX-2 antigen) (CD200 antigen)			1
ENSRNOG00000039297	Mrpl52	mitochondrial ribosomal protein L52			1
ENSRNOG00000039776	Exoc3	exocyst complex component 3	exocytosis; protein transport	rno04530:Tight junction	1
ENSRNOG00000039888	Abo2	histo-blood group ABO system transferase 2	carbohydrate metabolic process; defense response to bacterium	rno00601:Glycosphingolipid biosynthesis	1
ENSRNOG00000040040	RGD1309085	similar to F23N19.9			1
ENSRNOG00000040195	RGD1565421	similar to Sulfotransferase K2 (rSULT1C2A)			1
ENSRNOG00000042458	STAU2_RAT	staufen, RNA binding protein, homolog 2 (Drosophila)	transport		1
ENSRNOG00000042758	RGD1562351	similar to chromosome 7 open reading frame 23			1
ENSRNOG00000042947	RGD1563970	tripartite motif-containing 30			1
ENSRNOG00000042950	Slc5a9	solute carrier family 5 (sodium/glucose cotransporter), member 9	transmembrane transport; transport		1
ENSRNOG00000043344	Cyp4f40	cytochrome P450, family 4, subfamily f, polypeptide 40			1
ENSRNOG00000000081	LOC305633	similar to Antxr2 protein			2
ENSRNOG00000000221	Abhd5	abhydrolase domain containing 5	cell differentiation; fatty acid metabolic process; lipid metabolic process; phosphatidic acid biosynthetic process; phospholipid biosynthetic process; positive regulation of lipoprotein lipase activity; positive regulation of triglyceride catabolic process		2
ENSRNOG00000000236	Zfp207	zinc finger protein 207			2
ENSRNOG00000000325	Prep	prolyl endopeptidase	proteolysis		2
ENSRNOG00000000411	Nus1	nuclear undecaprenyl pyrophosphate synthase 1 homolog (S. cerevisiae)			2
ENSRNOG00000000479	KIFC1_RAT	kinesin family member C1	cell cycle; cell division; microtubule-based movement; mitosis		2
ENSRNOG00000000523	Ppil1	peptidylprolyl isomerase (cyclophilin)-like 1	protein folding	rno03040:Spliceosome	2
ENSRNOG00000000577	Ddit4	DNA-damage-inducible transcript 4	apoptosis; negative regulation of signal transduction; response to hypoxia	rno04150:mTOR signaling pathway	2
ENSRNOG00000000632	Cdc2	cyclin-dependent kinase 1	G1 phase of mitotic cell cycle; cell aging; cell cycle; cell division; chromosome condensation; mitosis; organ regeneration; positive regulation of cardiac muscle cell proliferation; positive regulation of mitotic cell cycle; protein amino acid phosphorylation; response to cadmium ion; response to drug; response to ethanol; response to hydrogen peroxide; response to organic nitrogen	rno04110:Cell cycle; rno04114:Oocyte meiosis; rno04115:p53 signaling pathway; rno04540:Gap junction; rno04914:Progesterone-mediated oocyte maturation	2
ENSRNOG00000000645	Reep3	receptor accessory protein 3			2
ENSRNOG00000000697	Coro1c	coronin, actin binding protein 1C			2
ENSRNOG00000000718	Cggbp1	CGG triplet repeat binding protein 1			2
ENSRNOG00000000805	Gja1	gap junction protein, alpha 1	adult heart development; apoptosis; blood vessel morphogenesis; cell communication; cell-cell signaling; embryonic heart tube development; heart looping; in utero embryonic development; negative regulation of cell proliferation; neuron migration; neuron projection morphogenesis; positive regulation of protein catabolic process; protein oligomerization; regulation of calcium ion transport; regulat…	rno04540:Gap junction; rno05412:Arrhythmogenic right ventricular cardiomyopathy (ARVC)	2
ENSRNOG00000000816	B1WC08_RAT	similar to 2310014H01Rik protein			2
ENSRNOG00000000818	Nrm	nurim (nuclear envelope membrane protein)			2
ENSRNOG00000000821	Tubb5	tubulin, beta 5	microtubule-based movement; microtubule-based process; protein polymerization; spindle assembly	rno04540:Gap junction	2
ENSRNOG00000000938	Ran	RAN, member RAS oncogene family	cell cycle; cell division; intracellular protein transport; microtubule cytoskeleton organization; mitosis; nucleocytoplasmic transport; protein export from nucleus; protein import into nucleus; protein transport; signal transduction; small GTPase mediated signal transduction; spermatid development		2
ENSRNOG00000000967	Aacs	acetoacetyl-CoA synthetase	fatty acid metabolic process; lipid metabolic process; liver development; metabolic process; positive regulation of insulin secretion; response to drug; response to ethanol; response to nutrient; response to organic cyclic substance; response to organic nitrogen; white fat cell differentiation	rno00650:Butanoate metabolism	2
ENSRNOG00000000991	Arpc1b	actin related protein 2/3 complex, subunit 1B	regulation of actin filament polymerization	rno04666:Fc gamma R-mediated phagocytosis; rno04810:Regulation of actin cytoskeleton	2
ENSRNOG00000000999	LOC690516	similar to RIKEN cDNA 4930431E10	negative regulation of ossification; protein modification process; protein ubiquitination	rno04120:Ubiquitin mediated proteolysis; rno04144:Endocytosis; rno04350:TGF-beta signaling pathway	2
ENSRNOG00000001005	Fcer2	Fc fragment of IgE, low affinity II, receptor for (CD23)	positive regulation of humoral immune response mediated by circulating immunoglobulin; positive regulation of nitric-oxide synthase activity	rno04640:Hematopoietic cell lineage	2
ENSRNOG00000001068	Rac1	ras-related C3 botulinum toxin substrate 1	Rac protein signal transduction; actin cytoskeleton organization; axon guidance; bone resorption; cell adhesion; cell proliferation; cellular component movement; chemotaxis; cytoskeleton organization; dendrite development; endocytosis; hyperosmotic response; intracellular protein transport; lamellipodium assembly; nucleocytoplasmic transport; positive regulation of DNA replication; positive regul…	rno04010:MAPK signaling pathway; rno04062:Chemokine signaling pathway; rno04310:Wnt signaling pathway; rno04360:Axon guidance; rno04370:VEGF signaling pathway; rno04510:Focal adhesion; rno04520:Adherens junction; rno04620:Toll-like receptor signaling pathway; rno04650:Natural killer cell mediated cytotoxicity; rno04662:B cell receptor signaling pathway; rno04664:Fc epsilon RI signaling pathway; r…	2
ENSRNOG00000001088	Rfc3	replication factor C (activator 1) 3	DNA replication	rno03030:DNA replication; rno03420:Nucleotide excision repair; rno03430:Mismatch repair	2
ENSRNOG00000001134	Rfc5	replication factor C (activator 1) 5	DNA replication	rno03030:DNA replication; rno03420:Nucleotide excision repair; rno03430:Mismatch repair	2
ENSRNOG00000001162	Tff2	trefoil factor 2			2
ENSRNOG00000001164	Tff1	trefoil factor 1	response to estradiol stimulus; response to iron ion; response to peptide hormone stimulus; response to stress; wound healing		2
ENSRNOG00000001267	Lss	lanosterol synthase (2,3-oxidosqualene-lanosterol cyclase)	cholesterol biosynthetic process; steroid biosynthetic process	rno00100:Steroid biosynthesis	2
ENSRNOG00000001339	Psmd9	proteasome (prosome, macropain) 26S subunit, non-ATPase, 9	apoptosis; negative regulation of insulin secretion; positive regulation of insulin secretion; positive regulation of transcription; positive regulation of transcription from RNA polymerase II promoter		2
ENSRNOG00000001414	Serpine1	serpin peptidase inhibitor, clade E (nexin, plasminogen activator inhibitor type 1), member 1	glucose homeostasis; negative regulation of proteolysis; regulation of angiogenesis; regulation of cell proliferation; response to reactive oxygen species; tissue regeneration	rno04115:p53 signaling pathway; rno04610:Complement and coagulation cascades	2
ENSRNOG00000001457	Rfc2	replication factor C (activator 1) 2	DNA replication	rno03030:DNA replication; rno03420:Nucleotide excision repair; rno03430:Mismatch repair	2
ENSRNOG00000001476	Cldn4	claudin 4		rno04514:Cell adhesion molecules (CAMs); rno04530:Tight junction; rno04670:Leukocyte transendothelial migration	2
ENSRNOG00000001501	Snrpa	small nuclear ribonucleoprotein polypeptide A		rno03040:Spliceosome	2
ENSRNOG00000001518	Itga6	integrin, alpha 6	brown fat cell differentiation; cell adhesion; cell-cell adhesion; cell-matrix adhesion; cellular response to extracellular stimulus; filopodium assembly; integrin-mediated signaling pathway; leukocyte migration; odontogenesis of dentine-containing tooth	rno04510:Focal adhesion; rno04512:ECM-receptor interaction; rno04514:Cell adhesion molecules (CAMs); rno04640:Hematopoietic cell lineage; rno04810:Regulation of actin cytoskeleton; rno05200:Pathways in cancer; rno05222:Small cell lung cancer; rno05410:Hypertrophic cardiomyopathy (HCM); rno05412:Arrhythmogenic right ventricular cardiomyopathy (ARVC); rno05414:Dilated cardiomyopathy	2
ENSRNOG00000001549	Gabpa	GA binding protein transcription factor, alpha subunit	in utero embryonic development; negative regulation of transcription from RNA polymerase II promoter		2
ENSRNOG00000001607	Adamts1	ADAM metallopeptidase with thrombospondin type 1 motif, 1	heart trabecula formation; integrin-mediated signaling pathway; kidney development; ovulation from ovarian follicle; proteolysis		2
ENSRNOG00000001692	Chaf1b	chromatin assembly factor 1, subunit B (p60)			2
ENSRNOG00000001719	Psmd2	proteasome (prosome, macropain) 26S subunit, non-ATPase, 2	regulation of protein catabolic process	rno03050:Proteasome	2
ENSRNOG00000001736	Bdh1	3-hydroxybutyrate dehydrogenase, type 1	metabolic process; oxidation reduction	rno00072:Synthesis and degradation of ketone bodies; rno00650:Butanoate metabolism	2
ENSRNOG00000001816	Rfc4	replication factor C (activator 1) 4	DNA replication	rno03030:DNA replication; rno03420:Nucleotide excision repair; rno03430:Mismatch repair	2
ENSRNOG00000001821	Adipoq	adiponectin, C1Q and collagen domain containing	brown fat cell differentiation; fatty acid beta-oxidation; glucose homeostasis; glucose metabolic process; membrane depolarization; negative regulation of I-kappaB kinase/NF-kappaB cascade; negative regulation of fat cell differentiation; negative regulation of hormone secretion; negative regulation of macrophage derived foam cell differentiation; negative regulation of tumor necrosis factor prod…	rno03320:PPAR signaling pathway; rno04920:Adipocytokine signaling pathway; rno04930:Type II diabetes mellitus	2
ENSRNOG00000001823	St6gal1	ST6 beta-galactosamide alpha-2,6-sialyltranferase 1	protein amino acid glycosylation	rno00510:N-Glycan biosynthesis	2
ENSRNOG00000001833	Mcm4	minichromosome maintenance complex component 4	DNA replication; DNA unwinding during replication; photosynthesis	rno03030:DNA replication; rno04110:Cell cycle	2
ENSRNOG00000001859	Sdf2l1	stromal cell-derived factor 2-like 1			2
ENSRNOG00000001861	Ydjc	YdjC homolog (bacterial)			2
ENSRNOG00000001967	Sult1b1	sulfotransferase family, cytosolic, 1B, member 1	lipid metabolic process; steroid metabolic process		2
ENSRNOG00000002012	Donson	downstream neighbor of SON			2
ENSRNOG00000002045	Anxa3	annexin A3			2
ENSRNOG00000002122	Lrrc8c	leucine rich repeat containing 8 family, member C			2
ENSRNOG00000002145	Tmprss7	transmembrane serine protease 7	proteolysis		2
ENSRNOG00000002167	Dmp1	dentin matrix acidic phosphoprotein 1	biomineral formation; extracellular matrix organization; ossification; positive regulation of cell-substrate adhesion; regulation of bone mineralization		2
ENSRNOG00000002185	B1H277_RAT	phosphoglucomutase 2	carbohydrate metabolic process; transport		2
ENSRNOG00000002217	Plac8	placenta-specific 8			2
ENSRNOG00000002323	RGD1566265	chromatin modifying protein 1B; similar to RIKEN cDNA 2610002M06	protein transport	rno04144:Endocytosis	2
ENSRNOG00000002418	Tgfb2	transforming growth factor, beta 2	activation-induced cell death of T cells; aging; axon guidance; blood vessel development; blood vessel remodeling; cartilage condensation; cell death; cell morphogenesis; dopamine biosynthetic process; extracellular matrix organization; eye development; female pregnancy; growth; gut development; hair follicle development; hair follicle morphogenesis; heart development; hemopoiesis; hindbrain deve…	rno04010:MAPK signaling pathway; rno04110:Cell cycle; rno04350:TGF-beta signaling pathway; rno04672:Intestinal immune network for IgA production; rno05200:Pathways in cancer; rno05210:Colorectal cancer; rno05211:Renal cell carcinoma; rno05212:Pancreatic cancer; rno05220:Chronic myeloid leukemia; rno05410:Hypertrophic cardiomyopathy (HCM); rno05414:Dilated cardiomyopathy	2
ENSRNOG00000002433	G3bp2	GTPase activating protein (SH3 domain) binding protein 2	transport		2
ENSRNOG00000002440	Ralb	v-ral simian leukemia viral oncogene homolog B (ras related; GTP binding protein)	intracellular protein transport; nucleocytoplasmic transport; protein transport; signal transduction; small GTPase mediated signal transduction	rno05200:Pathways in cancer; rno05212:Pancreatic cancer	2
ENSRNOG00000002467	Pgk1	phosphoglycerate kinase 1; similar to Phosphoglycerate kinase 1	carbohydrate metabolic process; gluconeogenesis; glycolysis; phosphorylation	rno00010:Glycolysis / Gluconeogenesis	2
ENSRNOG00000002515	ATP7A_RAT	ATPase, Cu++ transporting, alpha polypeptide	ATP biosynthetic process; blood vessel development; blood vessel remodeling; cartilage development; cellular copper ion homeostasis; central nervous system neuron development; cerebellar Purkinje cell differentiation; collagen fibril organization; copper ion transport; dendrite morphogenesis; dopamine metabolic process; hair follicle morphogenesis; in utero embryonic development; ion transport; l…		2
ENSRNOG00000002520	Litaf	lipopolysaccharide-induced TNF factor	apoptosis; positive regulation of I-kappaB kinase/NF-kappaB cascade; regulation of transcription		2
ENSRNOG00000002662	RGD1562502	similar to RIKEN cDNA 2610029G23			2
ENSRNOG00000002667	Lamc2	laminin, gamma 2	cell adhesion	rno04510:Focal adhesion; rno04512:ECM-receptor interaction; rno05200:Pathways in cancer; rno05222:Small cell lung cancer	2
ENSRNOG00000002671	Nme2	non-metastatic cells 2, protein (NM23B) expressed in; similar to Nucleoside diphosphate kinase B (NDK B) (NDP kinase B) (P18)	CTP biosynthetic process; GTP biosynthetic process; UTP biosynthetic process; positive regulation of cAMP biosynthetic process	rno00230:Purine metabolism; rno00240:Pyrimidine metabolism	2
ENSRNOG00000002680	Lamc1	laminin, gamma 1	cell adhesion; cell migration; chemotaxis; protein complex assembly; signal transduction	rno04510:Focal adhesion; rno04512:ECM-receptor interaction; rno05020:Prion diseases; rno05200:Pathways in cancer; rno05222:Small cell lung cancer	2
ENSRNOG00000002693	Nme1	non-metastatic cells 1, protein (NM23A) expressed in	CTP biosynthetic process; GTP biosynthetic process; UTP biosynthetic process; cell differentiation; endocytosis; lactation; nervous system development; nucleotide metabolic process; positive regulation of DNA binding; positive regulation of epithelial cell proliferation; response to cAMP; response to drug	rno00230:Purine metabolism; rno00240:Pyrimidine metabolism	2
ENSRNOG00000002711	Nuf2	NUF2, NDC80 kinetochore complex component, homolog (S. cerevisiae)	cell cycle; cell division; mitosis		2
ENSRNOG00000002749	B5DF76_RAT	sperm associated antigen 9	activation of MAPK activity; protein homooligomerization		2
ENSRNOG00000002790	Abcb7	ATP-binding cassette, subfamily B (MDR/TAP), member 7	cellular iron ion homeostasis; transmembrane transport; transport	rno02010:ABC transporters	2
ENSRNOG00000002794	Selp	selectin P	blood vessel morphogenesis; heterophilic cell adhesion; inflammatory response; leukocyte migration; leukocyte tethering or rolling; positive regulation of cell adhesion; positive regulation of leukocyte migration; response to lipopolysaccharide; response to organic cyclic substance	rno04514:Cell adhesion molecules (CAMs)	2
ENSRNOG00000002802	Cxcl1	chemokine (C-X-C motif) ligand 1 (melanoma growth stimulating activity, alpha)	immune response; inflammatory response; neutrophil chemotaxis	rno04062:Chemokine signaling pathway; rno04621:NOD-like receptor signaling pathway	2
ENSRNOG00000002815	F5	coagulation factor V (proaccelerin, labile factor)	blood circulation; blood coagulation; cell adhesion; oxidation reduction	rno04610:Complement and coagulation cascades	2
ENSRNOG00000002824	Rnf12	ring finger protein, LIM domain interacting	protein ubiquitination; ubiquitin-dependent protein catabolic process		2
ENSRNOG00000002843	Cxcl6	chemokine (C-X-C motif) ligand 6 (granulocyte chemotactic protein 2)	cytokine production; immune response; inflammatory response	rno04062:Chemokine signaling pathway	2
ENSRNOG00000002989	Nmt1	N-myristoyltransferase 1	in utero embryonic development		2
ENSRNOG00000003029	Calr	calreticulin	cell cycle arrest; cortical actin cytoskeleton organization; negative regulation of neuron differentiation; negative regulation of transcription from RNA polymerase II promoter; negative regulation of translation; positive regulation of DNA replication; positive regulation of cell cycle; positive regulation of cell proliferation; positive regulation of phagocytosis; protein export from nucleus; p…	rno04612:Antigen processing and presentation	2
ENSRNOG00000003103	Lbr	lamin B receptor			2
ENSRNOG00000003208	Ercc6l	excision repair cross-complementing rodent repair deficiency complementation group 6 - like			2
ENSRNOG00000003346	Fancb	Fanconi anemia, complementation group B			2
ENSRNOG00000003388	Cenpf	centromere protein F	heart development; negative regulation of apoptosis; negative regulation of transcription; positive regulation of cell cycle; positive regulation of cell proliferation; regulation of establishment of protein localization; regulation of microtubule-based process		2
ENSRNOG00000003524	Lrrc59	leucine rich repeat containing 59			2
ENSRNOG00000003546	Tnfrsf12a	tumor necrosis factor receptor superfamily, member 12a	cell adhesion; cell death; positive regulation of axon extension	rno04060:Cytokine-cytokine receptor interaction	2
ENSRNOG00000003594	Tmem183a	transmembrane protein 183A			2
ENSRNOG00000003657	Pkmyt1	protein kinase, membrane associated tyrosine/threonine 1	protein amino acid phosphorylation	rno04110:Cell cycle; rno04114:Oocyte meiosis; rno04914:Progesterone-mediated oocyte maturation	2
ENSRNOG00000003673	Nup85	nucleoporin 85	chemotaxis; lamellipodium assembly; mRNA transport; macrophage chemotaxis; protein transport; transmembrane transport		2
ENSRNOG00000003696	Prkx	protein kinase, X-linked	protein amino acid phosphorylation	rno04010:MAPK signaling pathway; rno04020:Calcium signaling pathway; rno04062:Chemokine signaling pathway; rno04114:Oocyte meiosis; rno04210:Apoptosis; rno04270:Vascular smooth muscle contraction; rno04310:Wnt signaling pathway; rno04340:Hedgehog signaling pathway; rno04540:Gap junction; rno04720:Long-term potentiation; rno04740:Olfactory transduction; rno04742:Taste transduction; rno04910:Insuli…	2
ENSRNOG00000003703	Mcm6	minichromosome maintenance complex component 6	DNA replication; DNA replication initiation; DNA unwinding during replication	rno03030:DNA replication; rno04110:Cell cycle	2
ENSRNOG00000003759	Galc	galactosylceramidase	carbohydrate metabolic process	rno00600:Sphingolipid metabolism; rno04142:Lysosome	2
ENSRNOG00000003831	Tdp1	tyrosyl-DNA phosphodiesterase 1	DNA repair; double-strand break repair; response to DNA damage stimulus; single strand break repair		2
ENSRNOG00000003864	Gipc1	GIPC PDZ domain containing family, member 1	endothelial cell migration; glutamate secretion; positive regulation of transforming growth factor beta receptor signaling pathway; protein targeting; regulation of protein stability; regulation of synaptic plasticity; synaptic transmission		2
ENSRNOG00000003876	Exo1	exonuclease 1	DNA recombination; DNA repair; isotype switching; mismatch repair; somatic hypermutation of immunoglobulin genes	rno03430:Mismatch repair	2
ENSRNOG00000003899	Krt14	keratin 14	epithelial cell differentiation; response to ionizing radiation; response to zinc ion		2
ENSRNOG00000003958	Commd10	COMM domain containing 10			2
ENSRNOG00000004019	Phlda1	pleckstrin homology-like domain, family A, member 1	apoptosis; induction of apoptosis		2
ENSRNOG00000004059	RGD1561792	similar to CG14903-PA			2
ENSRNOG00000004242	Pole2	polymerase (DNA directed), epsilon 2 (p59 subunit)	DNA replication; DNA-dependent DNA replication	rno00230:Purine metabolism; rno00240:Pyrimidine metabolism; rno03030:DNA replication; rno03410:Base excision repair; rno03420:Nucleotide excision repair	2
ENSRNOG00000004247	Nhp2	NHP2 ribonucleoprotein homolog (yeast)			2
ENSRNOG00000004249	Tlr7	toll-like receptor 7	I-kappaB phosphorylation; defense response to virus; innate immune response; microglial cell activation during immune response; pathogen-associated molecular pattern dependent induction by symbiont of host innate immunity; positive regulation of NF-kappaB import into nucleus; positive regulation of chemokine production; positive regulation of interferon-gamma biosynthetic process; positive regula…	rno04620:Toll-like receptor signaling pathway	2
ENSRNOG00000004322	Sh3kbp1	SH3-domain kinase binding protein 1	endocytosis; regulation of apoptosis	rno04144:Endocytosis	2
ENSRNOG00000004458	Ston2	stonin 2	endocytosis; intracellular protein transport; regulation of endocytosis; vesicle-mediated transport		2
ENSRNOG00000004464	Sel1l	sel-1 suppressor of lin-12-like (C. elegans)	Notch signaling pathway		2
ENSRNOG00000004471	Polr3h	polymerase (RNA) III (DNA directed) polypeptide H	transcription; transcription from RNA polymerase III promoter	rno00230:Purine metabolism; rno00240:Pyrimidine metabolism; rno03020:RNA polymerase; rno04623:Cytosolic DNA-sensing pathway	2
ENSRNOG00000004479	Aurka	aurora kinase A	mitotic cell cycle; protein amino acid phosphorylation; regulation of protein stability; response to estradiol stimulus	rno04114:Oocyte meiosis	2
ENSRNOG00000004487	LOC690209	NIMA (never in mitosis gene a)-related expressed kinase 2; rCG20225-like; similar to NIMA (never in mitosis gene a)-related expressed kinase 2	chromosome segregation; mitotic sister chromatid segregation; protein amino acid autophosphorylation; protein amino acid phosphorylation		2
ENSRNOG00000004563	Sec24a	SEC24 family, member A (S. cerevisiae)	ER to Golgi vesicle-mediated transport; intracellular protein transport		2
ENSRNOG00000004575	Il1a	interleukin 1 alpha	cellular response to heat; cytokine-mediated signaling pathway; fever; immune response; inflammatory response; negative regulation of cell proliferation; positive regulation of ERK1 and ERK2 cascade; positive regulation of I-kappaB kinase/NF-kappaB cascade; positive regulation of JNK cascade; positive regulation of angiogenesis; positive regulation of cell division; positive regulation of cytokin…	rno04010:MAPK signaling pathway; rno04060:Cytokine-cytokine receptor interaction; rno04210:Apoptosis; rno04640:Hematopoietic cell lineage; rno04940:Type I diabetes mellitus; rno05020:Prion diseases; rno05332:Graft-versus-host disease	2
ENSRNOG00000004621	Rtn4<sup>Tn(sb-T2/Bart3)2.316Mcwi</sup>	reticulon 4	angiogenesis; negative regulation of axon extension; nervous system development; regulation of cell migration		2
ENSRNOG00000004649	Il1b	interleukin 1 beta	activation of MAPK activity; aging; anti-apoptosis; cytokine-mediated signaling pathway; elevation of cytosolic calcium ion concentration; fever; immune response; inflammatory response; leukocyte migration; memory; negative regulation of MAP kinase activity; negative regulation of cell proliferation; negative regulation of glutamate secretion; negative regulation of insulin receptor signaling pat…	rno04010:MAPK signaling pathway; rno04060:Cytokine-cytokine receptor interaction; rno04210:Apoptosis; rno04620:Toll-like receptor signaling pathway; rno04621:NOD-like receptor signaling pathway; rno04623:Cytosolic DNA-sensing pathway; rno04640:Hematopoietic cell lineage; rno04940:Type I diabetes mellitus; rno05010:Alzheimer's disease; rno05020:Prion diseases; rno05332:Graft-versus-host disease	2
ENSRNOG00000004807	Arf2	ADP-ribosylation factor 2	intracellular protein transport; protein transport; small GTPase mediated signal transduction; vesicle-mediated transport		2
ENSRNOG00000004921	Nusap1	nucleolar and spindle associated protein 1	mitotic chromosome condensation; positive regulation of mitosis		2
ENSRNOG00000004959	Actr2	ARP2 actin-related protein 2 homolog (yeast)			2
ENSRNOG00000004968	Luzp5	non-SMC condensin II complex, subunit G2	inner cell mass cell proliferation		2
ENSRNOG00000004992	Rab1	RAB1, member RAS oncogene family	ER to Golgi vesicle-mediated transport; Rab protein signal transduction; intracellular protein transport; nucleocytoplasmic transport; protein transport; signal transduction; small GTPase mediated signal transduction; vesicle-mediated transport		2
ENSRNOG00000005038	Ube2t	ubiquitin-conjugating enzyme E2T (putative)	post-translational protein modification; regulation of protein metabolic process		2
ENSRNOG00000005115	Asf1b	ASF1 anti-silencing function 1 homolog B (S. cerevisiae)	chromatin assembly or disassembly; nucleosome assembly		2
ENSRNOG00000005274	Vrk1	vaccinia related kinase 1	protein amino acid autophosphorylation; protein amino acid phosphorylation		2
ENSRNOG00000005291	Slc38a1	solute carrier family 38, member 1	amino acid transport; ion transport; sodium ion transport		2
ENSRNOG00000005292	Fbln5	fibulin 5; thyroid hormone receptor interactor 11	cell adhesion; regulation of cell growth		2
ENSRNOG00000005370	S1pr4	sphingosine-1-phosphate receptor 4	activation of adenylate cyclase activity by G-protein signaling pathway	rno04080:Neuroactive ligand-receptor interaction	2
ENSRNOG00000005371	Klhl29	kelch-like 29 (Drosophila)			2
ENSRNOG00000005376	Mad2l1	MAD2 mitotic arrest deficient-like 1 (yeast)	mitosis; mitotic cell cycle spindle assembly checkpoint; mitotic sister chromatid segregation	rno04110:Cell cycle; rno04114:Oocyte meiosis; rno04914:Progesterone-mediated oocyte maturation	2
ENSRNOG00000005390	Nup210	nucleoporin 210	mRNA transport; protein transport; transmembrane transport		2
ENSRNOG00000005413	Creb3l1	cAMP responsive element binding protein 3-like 1	regulation of transcription; response to unfolded protein	rno04916:Melanogenesis; rno05016:Huntington's disease; rno05215:Prostate cancer	2
ENSRNOG00000005659	Aurkb	aurora kinase B	cell cycle; cytokinesis; methylation; mitosis; protein amino acid phosphorylation		2
ENSRNOG00000005705	RGD1562284	similar to Glutaminyl-peptide cyclotransferase precursor (QC)	proteolysis		2
ENSRNOG00000005707	Bfsp1	beaded filament structural protein 1			2
ENSRNOG00000005720	Spic	Spi-C transcription factor (Spi-1/PU.1 related)			2
ENSRNOG00000005727	Galnt3	UDP-N-acetyl-alpha-D-galactosamine:polypeptide N-acetylgalactosaminyltransferase 3 (GalNAc-T3)		rno00512:O-Glycan biosynthesis	2
ENSRNOG00000005871	Il1rn	interleukin 1 receptor antagonist	female pregnancy; insulin secretion; lipid metabolic process; memory; negative regulation of apoptosis; negative regulation of glutamate secretion; negative regulation of signal transduction; positive regulation of JUN kinase activity; response to drug; response to organic cyclic substance; response to organic nitrogen		2
ENSRNOG00000005900	Slc2a6	solute carrier family 2 (facilitated glucose transporter), member 6	transmembrane transport; transport		2
ENSRNOG00000005904	Cdc27	cell division cycle 27 homolog (S. cerevisiae)	modification-dependent protein catabolic process; protein K11-linked ubiquitination	rno04110:Cell cycle; rno04114:Oocyte meiosis; rno04120:Ubiquitin mediated proteolysis; rno04914:Progesterone-mediated oocyte maturation	2
ENSRNOG00000005905	Pde4b	phosphodiesterase 4B, cAMP specific	cAMP catabolic process; signal transduction	rno00230:Purine metabolism	2
ENSRNOG00000005907	Rad18	RAD18 homolog (S. cerevisiae)	DNA repair; response to UV; spermatogenesis		2
ENSRNOG00000005935	A3galt2	alpha 1,3-galactosyltransferase 2	carbohydrate metabolic process		2
ENSRNOG00000005936	Foxm1	forkhead box M1	liver development; positive regulation of cell proliferation; positive regulation of transcription from RNA polymerase II promoter; vasculogenesis		2
ENSRNOG00000005944	Slurp1	secreted Ly6/Plaur domain containing 1			2
ENSRNOG00000006019	G0s2	G0/G1switch 2			2
ENSRNOG00000006056	Asap2	ArfGAP with SH3 domain, ankyrin repeat and PH domain 2	regulation of ARF GTPase activity		2
ENSRNOG00000006228	Pdia4	protein disulfide isomerase family A, member 4	cell redox homeostasis		2
ENSRNOG00000006280	Pcsk9	proprotein convertase subtilisin/kexin type 9	cellular response to insulin stimulus; cellular response to starvation; cholesterol homeostasis; cholesterol metabolic process; induction of apoptosis; kidney development; lipid metabolic process; lipoprotein metabolic process; liver development; negative regulation of catalytic activity; neurogenesis; neuron differentiation; phospholipid metabolic process; positive regulation of neuron apoptosis…		2
ENSRNOG00000006320	Ptges	prostaglandin E synthase	acute inflammatory response; chronic inflammatory response; negative regulation of cell proliferation; prostaglandin biosynthetic process; prostaglandin metabolic process; response to calcium ion; response to cytokine stimulus; response to lipopolysaccharide; response to organic cyclic substance; response to retinoic acid	rno00590:Arachidonic acid metabolism	2
ENSRNOG00000006340	Memo1	mediator of cell motility 1			2
ENSRNOG00000006345	Sec61b	Sec61 beta subunit	protein import into nucleus, translocation; "retrograde protein transport, ER to cytosol"; ER-associated protein catabolic process		2
ENSRNOG00000006375	RGD1566161	voltage-dependent anion channel 1	anion transport; apoptosis; transmembrane transport	rno04020:Calcium signaling pathway; rno05012:Parkinson's disease; rno05016:Huntington's disease	2
ENSRNOG00000006388	Pygl	phosphorylase, glycogen, liver	carbohydrate metabolic process; glucose homeostasis	rno00500:Starch and sucrose metabolism; rno04910:Insulin signaling pathway	2
ENSRNOG00000006479	Lama5	laminin, alpha 5	branching involved in salivary gland morphogenesis; branching involved in ureteric bud morphogenesis; cell adhesion; cilium assembly; hair follicle development; integrin-mediated signaling pathway; lung development; morphogenesis of embryonic epithelium; muscle organ development; neural crest cell migration; odontogenesis of dentine-containing tooth; organ morphogenesis; regulation of cell adhesi…	rno04510:Focal adhesion; rno04512:ECM-receptor interaction; rno05200:Pathways in cancer; rno05222:Small cell lung cancer	2
ENSRNOG00000006541	Nup107	nucleoporin 107	mRNA export from nucleus; protein transport; transmembrane transport; transport		2
ENSRNOG00000006589	Mif	macrophage migration inhibitory factor	aging; brain development; drinking behavior; hair follicle development; inflammatory response; innate immune response; positive regulation of glucose import; positive regulation of immune response; positive regulation of potassium ion transport; response to drug; response to estradiol stimulus; response to glucocorticoid stimulus; response to heat; response to hormone stimulus; response to inorga…	rno00350:Tyrosine metabolism; rno00360:Phenylalanine metabolism	2
ENSRNOG00000006619	A8QIC3_RAT	DnaJ (Hsp40) homolog, subfamily C, member 9			2
ENSRNOG00000006642	Yipf6	Yip1 domain family, member 6			2
ENSRNOG00000006674	Fam101b	family with sequence similarity 101, member B			2
ENSRNOG00000006701	Fgd6	FYVE, RhoGEF and PH domain containing 6	regulation of Rho protein signal transduction		2
ENSRNOG00000006731	Spc25	SPC25, NDC80 kinetochore complex component, homolog (S. cerevisiae)	cell cycle; cell division; chromosome segregation; mitosis; mitotic spindle organization		2
ENSRNOG00000006859	Insig1	insulin induced gene 1	cellular response to insulin stimulus; cholesterol metabolic process; lipid metabolic process; response to estradiol stimulus; response to fatty acid; response to peptide hormone stimulus; steroid metabolic process		2
ENSRNOG00000006996	RGD1304693	similar to CG14803-PA			2
ENSRNOG00000007060	Adfp	adipose differentiation related protein	lipid storage; long-chain fatty acid transport; response to drug; response to organic cyclic substance		2
ENSRNOG00000007088	Xpot	exportin, tRNA (nuclear export receptor for tRNAs)			2
ENSRNOG00000007089	Lgmn	legumain	negative regulation of multicellular organism growth; proteolysis	rno04142:Lysosome; rno04612:Antigen processing and presentation	2
ENSRNOG00000007151	Pftk1	PFTAIRE protein kinase 1	protein amino acid phosphorylation		2
ENSRNOG00000007159	Ccl2	chemokine (C-C motif) ligand 2	anti-apoptosis; cellular calcium ion homeostasis; chemotaxis; immune response; inflammatory response; macrophage chemotaxis; neutrophil chemotaxis; organ regeneration; positive regulation of endothelial cell proliferation; positive regulation of synaptic transmission; response to activity; response to amino acid stimulus; response to antibiotic; response to bacterium; response to drug; response t…	rno04060:Cytokine-cytokine receptor interaction; rno04062:Chemokine signaling pathway; rno04621:NOD-like receptor signaling pathway	2
ENSRNOG00000007183	PPIA_RAT	TRIMCyp-like; peptidylprolyl isomerase A (cyclophilin A)	protein folding		2
ENSRNOG00000007221	Dut	deoxyuridine triphosphatase	nucleotide metabolic process	rno00240:Pyrimidine metabolism	2
ENSRNOG00000007254	Ttc9	tetratricopeptide repeat domain 9	protein folding		2
ENSRNOG00000007350	Rac2	ras-related C3 botulinum toxin substrate 2 (rho family, small GTP binding protein Rac2)	actin cytoskeleton organization; bone resorption; cell projection assembly; chemotaxis; intracellular protein transport; nucleocytoplasmic transport; positive regulation of cell proliferation; protein transport; signal transduction; small GTPase mediated signal transduction	rno04010:MAPK signaling pathway; rno04062:Chemokine signaling pathway; rno04310:Wnt signaling pathway; rno04360:Axon guidance; rno04370:VEGF signaling pathway; rno04510:Focal adhesion; rno04520:Adherens junction; rno04650:Natural killer cell mediated cytotoxicity; rno04662:B cell receptor signaling pathway; rno04664:Fc epsilon RI signaling pathway; rno04666:Fc gamma R-mediated phagocytosis; rno04…	2
ENSRNOG00000007400	Srebf2	sterol regulatory element binding transcription factor 2	aging; cholesterol metabolic process; lipid biosynthetic process; positive regulation of transcription; positive regulation of transcription from RNA polymerase II promoter; regulation of transcription; response to drug; response to hormone stimulus; response to lead ion; response to lipid; spermatogenesis; steroid metabolic process		2
ENSRNOG00000007412	Dok1	docking protein 1	Ras protein signal transduction; protein kinase cascade; transmembrane receptor protein tyrosine kinase signaling pathway		2
ENSRNOG00000007483	Ccnf	cyclin F	cell cycle; cell division; placenta development		2
ENSRNOG00000007492	Rpn2	ribophorin II	protein amino acid N-linked glycosylation via asparagine	rno00510:N-Glycan biosynthesis	2
ENSRNOG00000007545	Angptl4	angiopoietin-like 4	angiogenesis; cell differentiation; multicellular organismal development; negative regulation of apoptosis; negative regulation of catalytic activity; protein homooligomerization; regulation of lipid metabolic process; response to hypoxia; signal transduction	rno03320:PPAR signaling pathway	2
ENSRNOG00000007584	Ehd4	EH-domain containing 4	regulation of endocytosis	rno04144:Endocytosis	2
ENSRNOG00000007660	Fntb	farnesyltransferase, CAAX box, beta	negative regulation of cell proliferation; positive regulation of cell cycle; positive regulation of fibroblast proliferation; response to cytokine stimulus; response to inorganic substance; response to organic cyclic substance; wound healing		2
ENSRNOG00000007775	Cmpk1	cytidine monophosphate (UMP-CMP) kinase 1	nucleobase, nucleoside, nucleotide and nucleic acid metabolic process; pyrimidine nucleotide biosynthetic process	rno00240:Pyrimidine metabolism	2
ENSRNOG00000007804	C1galt1	core 1 synthase, glycoprotein-N-acetylgalactosamine 3-beta-galactosyltransferase, 1	angiogenesis; cell differentiation; kidney development; multicellular organismal development	rno00512:O-Glycan biosynthesis	2
ENSRNOG00000007805	Mybl2	myeloblastosis oncogene-like 2			2
ENSRNOG00000007906	Bub1b	budding uninhibited by benzimidazoles 1 homolog, beta (S. cerevisiae)	protein amino acid phosphorylation	rno04110:Cell cycle	2
ENSRNOG00000007907	Tmem178	transmembrane protein 178			2
ENSRNOG00000007923	Cgref1	cell growth regulator with EF hand domain 1	cell adhesion; cell cycle; cell cycle arrest; negative regulation of cell growth		2
ENSRNOG00000007966	B4galt1	UDP-Gal:betaGlcNAc beta 1,4- galactosyltransferase, polypeptide 1	acute inflammatory response; binding of sperm to zona pellucida; branching morphogenesis of a tube; carbohydrate metabolic process; cell adhesion; epithelial cell development; extracellular matrix organization; galactose metabolic process; leukocyte migration; mammary gland development; negative regulation of cell proliferation; oligosaccharide biosynthetic process; penetration of zona pellucida	rno00052:Galactose metabolism; rno00510:N-Glycan biosynthesis; rno00533:Keratan sulfate biosynthesis; rno00601:Glycosphingolipid biosynthesis	2
ENSRNOG00000007988	Timm22	translocase of inner mitochondrial membrane 22 homolog (yeast)	protein transport; transmembrane transport		2
ENSRNOG00000008055	Ccne2	cyclin E2	DNA replication initiation; regulation of cell cycle	rno04110:Cell cycle; rno04114:Oocyte meiosis; rno04115:p53 signaling pathway; rno05200:Pathways in cancer; rno05215:Prostate cancer; rno05222:Small cell lung cancer	2
ENSRNOG00000008091	Gins1	GINS complex subunit 1 (Psf1 homolog)	DNA replication; inner cell mass cell proliferation		2
ENSRNOG00000008115	Arhgap11a	Rho GTPase activating protein 11A	signal transduction		2
ENSRNOG00000008165	Tpx2	TPX2, microtubule-associated, homolog (Xenopus laevis)			2
ENSRNOG00000008252	Spink4	serine peptidase inhibitor, Kazal type 4			2
ENSRNOG00000008367	Krt86	keratin 86			2
ENSRNOG00000008390	Dcun1d5	DCN1, defective in cullin neddylation 1, domain containing 5 (S. cerevisiae)			2
ENSRNOG00000008412	Gprc5a	G protein-coupled receptor, family C, group 5, member A			2
ENSRNOG00000008504	Lsm8	LSM8 homolog, U6 small nuclear RNA associated (S. cerevisiae)		rno03018:RNA degradation; rno03040:Spliceosome	2
ENSRNOG00000008632	Invs	inversin	kidney development; pancreas development; post-embryonic development		2
ENSRNOG00000008673	Arpc3	actin related protein 2/3 complex, subunit 3	regulation of actin filament polymerization	rno04666:Fc gamma R-mediated phagocytosis; rno04810:Regulation of actin cytoskeleton	2
ENSRNOG00000008682	Mtch2	mitochondrial carrier homolog 2 (C. elegans)	transmembrane transport; transport		2
ENSRNOG00000008713	Slc41a2	solute carrier family 41, member 2	cation transport		2
ENSRNOG00000008781	RGD1310769	similar to HSPC288			2
ENSRNOG00000008822	Fkbp1a	FK506 binding protein 1a	T cell proliferation; cytokine-mediated signaling pathway; muscle contraction; negative regulation of protein amino acid phosphorylation; protein folding; release of sequestered calcium ion into cytosol; response to caffeine; response to iron ion		2
ENSRNOG00000008837	Ass1	argininosuccinate synthetase 1	acute-phase response; cellular amino acid biosynthetic process; kidney development; liver development; response to biotic stimulus; response to drug; response to glucocorticoid stimulus; response to lipopolysaccharide; response to nutrient; response to peptide hormone stimulus; response to steroid hormone stimulus; response to zinc ion; urea cycle	rno00250:Alanine, aspartate and glutamate metabolism; rno00330:Arginine and proline metabolism	2
ENSRNOG00000008841	Orc1l	origin recognition complex, subunit 1-like (yeast)	DNA replication	rno04110:Cell cycle	2
ENSRNOG00000008932	Q3T1H0_RAT	non-SMC condensin II complex, subunit D3	mitotic chromosome condensation		2
ENSRNOG00000008981	RGD1561176	programmed cell death 6 interacting protein	DNA damage response, signal transduction resulting in induction of apoptosis; apoptosis; cell cycle; cell division; induction of apoptosis by extracellular signals; protein transport	rno04144:Endocytosis	2
ENSRNOG00000008994	Arpc4	actin related protein 2/3 complex, subunit 4	actin filament polymerization	rno04666:Fc gamma R-mediated phagocytosis; rno04810:Regulation of actin cytoskeleton	2
ENSRNOG00000009131	Zc3h12a	zinc finger CCCH type containing 12A	angiogenesis; apoptosis; cell differentiation; multicellular organismal development		2
ENSRNOG00000009323	RGD1311249	similar to RIKEN cDNA B230312A22			2
ENSRNOG00000009334	T4AF1_RAT	TRAF4 associated factor 1			2
ENSRNOG00000009342	Fcnb	ficolin B	complement activation, lectin pathway; signal transduction		2
ENSRNOG00000009354	Nrarp	Maternal Effect Lethal family member (mel-11)-like; Notch-regulated ankyrin repeat protein			2
ENSRNOG00000009550	Sqle	squalene epoxidase	cellular aromatic compound metabolic process; cholesterol metabolic process; oxidation reduction; response to organic substance	rno00100:Steroid biosynthesis	2
ENSRNOG00000009712	Gale	UDP-galactose-4-epimerase	biosynthetic process; carbohydrate metabolic process; cellular metabolic process; extracellular polysaccharide biosynthetic process; galactose metabolic process; metabolic process	rno00052:Galactose metabolism; rno00520:Amino sugar and nucleotide sugar metabolism	2
ENSRNOG00000009751	Gpx7	glutathione peroxidase 7	oxidation reduction; response to oxidative stress	rno00480:Glutathione metabolism; rno00590:Arachidonic acid metabolism	2
ENSRNOG00000009822	Tlr2	toll-like receptor 2	I-kappaB phosphorylation; defense response to Gram-positive bacterium; defense response to bacterium; immune response; innate immune response; microglial cell activation during immune response; negative regulation of growth of symbiont in host; pathogen-associated molecular pattern dependent induction by symbiont of host innate immunity; positive regulation of NF-kappaB import into nucleus; posit…	rno04620:Toll-like receptor signaling pathway	2
ENSRNOG00000009850	St3gal4	ST3 beta-galactoside alpha-2,3-sialyltransferase 4	protein amino acid glycosylation	rno00601:Glycosphingolipid biosynthesis	2
ENSRNOG00000009928	Bckdhb	branched chain keto acid dehydrogenase E1, beta polypeptide	branched chain family amino acid catabolic process; metabolic process; oxidation reduction; response to cAMP; response to glucocorticoid stimulus; response to nutrient	rno00280:Valine, leucine and isoleucine degradation	2
ENSRNOG00000009946	Ldlr	low density lipoprotein receptor	cholesterol homeostasis; cholesterol metabolic process; endocytosis; lipid metabolic process; lipid transport; response to estrogen stimulus; steroid metabolic process	rno04144:Endocytosis	2
ENSRNOG00000010018	Clec4a3	C-type lectin domain family 4, member a3			2
ENSRNOG00000010105	S100a11	S100 calcium binding protein A11 (calizzarin)			2
ENSRNOG00000010147	Pdcd10	programmed cell death 10	apoptosis; vesicle-mediated transport		2
ENSRNOG00000010208	Timp1	TIMP metallopeptidase inhibitor 1	aging; negative regulation of apoptosis; response to cytokine stimulus; response to peptide hormone stimulus; wound healing		2
ENSRNOG00000010274	Smc4	structural maintenance of chromosomes 4	chromosome organization; mitotic chromosome condensation		2
ENSRNOG00000010306	H2afz	H2A histone family, member Z	nucleosome assembly	rno05322:Systemic lupus erythematosus	2
ENSRNOG00000010332	Nipsnap3b	nipsnap homolog 3B (C. elegans)			2
ENSRNOG00000010352	Dnajc3	DnaJ (Hsp40) homolog, subfamily C, member 3	response to unfolded protein		2
ENSRNOG00000010362	Anxa2	annexin A2	angiogenesis; body fluid secretion; collagen fibril organization		2
ENSRNOG00000010386	H2afx	H2A histone family, member X	DNA damage checkpoint; DNA repair; cell aging; double-strand break repair via homologous recombination; nucleosome assembly; spermatogenesis	rno05322:Systemic lupus erythematosus	2
ENSRNOG00000010401	Fam25a	family with sequence similarity 25, member A			2
ENSRNOG00000010448	Ptbp1	polypyrimidine tract binding protein 1	RNA splicing; mRNA processing		2
ENSRNOG00000010510	Col12a1	collagen, type XII, alpha 1	cell adhesion		2
ENSRNOG00000010516	Plau	plasminogen activator, urokinase	angiogenesis; chemotaxis; embryo implantation; proteolysis; regulation of cell proliferation; response to hypoxia; signal transduction; skeletal muscle tissue regeneration; wound healing	rno04610:Complement and coagulation cascades	2
ENSRNOG00000010549	Tspo	translocator protein		rno04080:Neuroactive ligand-receptor interaction	2
ENSRNOG00000010574	Ptpn1	protein tyrosine phosphatase, non-receptor type 1	dephosphorylation; protein amino acid dephosphorylation	rno04520:Adherens junction; rno04910:Insulin signaling pathway	2
ENSRNOG00000010600	RGD1560880	similar to RIKEN cDNA 2310002J15			2
ENSRNOG00000010626	Sphk1	sphingosine kinase 1	activation of protein kinase C activity by G-protein coupled receptor protein signaling pathway; blood vessel development; brain development; calcium-mediated signaling; cellular response to hydrogen peroxide; cellular response to starvation; female pregnancy; inflammatory response; negative regulation of apoptosis; positive regulation of angiogenesis; positive regulation of cell growth; positive…	rno00600:Sphingolipid metabolism; rno04020:Calcium signaling pathway; rno04370:VEGF signaling pathway; rno04666:Fc gamma R-mediated phagocytosis	2
ENSRNOG00000010628	Sec13	SEC13 homolog (S. cerevisiae)	ER to Golgi vesicle-mediated transport; protein transport		2
ENSRNOG00000010721	Dlgap5	discs, large (Drosophila) homolog-associated protein 5	cell-cell signaling		2
ENSRNOG00000010805	Fabp4	fatty acid binding protein 4, adipocyte	brown fat cell differentiation; cholesterol homeostasis; cytokine production; fatty acid metabolic process; negative regulation of protein kinase activity; negative regulation of transcription; positive regulation of cell proliferation; positive regulation of inflammatory response; response to drug; response to glucocorticoid stimulus; transport; white fat cell differentiation	rno03320:PPAR signaling pathway	2
ENSRNOG00000010833	Mthfd2	methylenetetrahydrofolate dehydrogenase (NADP+ dependent) 2, methenyltetrahydrofolate cyclohydrolase; similar to methylenetetrahydrofolate dehydrogenase (NAD) (EC 1.5.1.15)/methenyltetrahydrofolate cyclohydrolase (EC 3.5.4.9) precursor	folic acid and derivative biosynthetic process; metabolic process	rno00630:Glyoxylate and dicarboxylate metabolism; rno00670:One carbon pool by folate	2
ENSRNOG00000010852	Nup205	nucleoporin 205	cellular metabolic process		2
ENSRNOG00000010895	Tmem30a	transmembrane protein 30A			2
ENSRNOG00000010951	Cmtm6	CKLF-like MARVEL transmembrane domain containing 6			2
ENSRNOG00000010966	Itgb1	integrin, beta 1	G1/S transition of mitotic cell cycle; cardiac muscle cell differentiation; cell adhesion; cell fate specification; cell-matrix adhesion; cellular calcium ion homeostasis; germ cell migration; in utero embryonic development; integrin-mediated signaling pathway; metabolic process; negative regulation of cell differentiation; neuron projection morphogenesis; oxidation reduction; positive regulation…	rno04360:Axon guidance; rno04510:Focal adhesion; rno04512:ECM-receptor interaction; rno04514:Cell adhesion molecules (CAMs); rno04670:Leukocyte transendothelial migration; rno04810:Regulation of actin cytoskeleton; rno05200:Pathways in cancer; rno05222:Small cell lung cancer; rno05410:Hypertrophic cardiomyopathy (HCM); rno05412:Arrhythmogenic right ventricular cardiomyopathy (ARVC); rno05414:Dila…	2
ENSRNOG00000011078	Srm	spermidine synthase	spermidine biosynthetic process	rno00270:Cysteine and methionine metabolism; rno00330:Arginine and proline metabolism; rno00410:beta-Alanine metabolism; rno00480:Glutathione metabolism	2
ENSRNOG00000011163	Soat2	sterol O-acyltransferase 2	cholesterol efflux; cholesterol metabolic process; lipid metabolic process; response to nutrient; steroid metabolic process	rno00100:Steroid biosynthesis	2
ENSRNOG00000011276	RGD1305689	similar to DNA segment, Chr 14, ERATO Doi 449, expressed			2
ENSRNOG00000011293	RGD1311747	similar to 2700029M09Rik protein			2
ENSRNOG00000011352	Furin	furin (paired basic amino acid cleaving enzyme)	cell proliferation; positive regulation of cell migration; positive regulation of transforming growth factor beta receptor signaling pathway; protein processing; proteolysis; regulation of protein catabolic process; signal peptide processing		2
ENSRNOG00000011446	Vill	villin-like	cytoskeleton organization		2
ENSRNOG00000011452	Aldoc	aldolase C, fructose-bisphosphate	fructose 1,6-bisphosphate metabolic process; aging; apoptosis; glycolysis; metabolic process; organ regeneration; protein homotetramerization; response to hypoxia; response to organic cyclic substance; response to organic nitrogen	rno00010:Glycolysis / Gluconeogenesis; rno00030:Pentose phosphate pathway; rno00051:Fructose and mannose metabolism	2
ENSRNOG00000011557	S100a8	S100 calcium binding protein A8	chemotaxis; inflammatory response		2
ENSRNOG00000011630	Ak3l1	adenylate kinase 3-like 1	nucleobase, nucleoside, nucleotide and nucleic acid metabolic process; response to organic cyclic substance; response to organic nitrogen	rno00230:Purine metabolism	2
ENSRNOG00000011646	Rem2	RAS (RAD and GEM) like GTP binding 2	protein transport; signal transduction; small GTPase mediated signal transduction		2
ENSRNOG00000011782	Got2	glutamic-oxaloacetic transaminase 2, mitochondrial (aspartate aminotransferase 2)	2-oxoglutarate metabolic process; biosynthetic process; cellular amino acid metabolic process; fatty acid transport; glutamate metabolic process	rno00250:Alanine, aspartate and glutamate metabolism; rno00270:Cysteine and methionine metabolism; rno00330:Arginine and proline metabolism; rno00350:Tyrosine metabolism; rno00360:Phenylalanine metabolism; rno00400:Phenylalanine, tyrosine and tryptophan biosynthesis	2
ENSRNOG00000011798	Mapre1	microtubule-associated protein, RP/EB family, member 1	cell cycle; cell division; mitosis		2
ENSRNOG00000011800	F3	coagulation factor III (thromboplastin, tissue factor)	activation of caspase activity; blood coagulation; positive regulation of angiogenesis; positive regulation of endothelial cell proliferation; positive regulation of protein kinase B signaling cascade	rno04610:Complement and coagulation cascades	2
ENSRNOG00000011821	S100a4	S100 calcium-binding protein A4			2
ENSRNOG00000011932	Snrpa1	U2 small nuclear ribonucleoprotein polypeptide A'; U2 small nuclear ribonucleoprotein polypeptide A-like			2
ENSRNOG00000011938	FXR1_RAT	fragile X mental retardation, autosomal homolog 1; rCG41429-like	cell differentiation; multicellular organismal development; muscle organ development; negative regulation of translation		2
ENSRNOG00000012008	S100a3	S100 calcium binding protein A3			2
ENSRNOG00000012067	Fam111a	family with sequence similarity 111, member A			2
ENSRNOG00000012156	Ostf1	osteoclast stimulating factor 1			2
ENSRNOG00000012249	Txlnb	taxilin beta			2
ENSRNOG00000012290	Gchfr	GTP cyclohydrolase I feedback regulator	protein complex assembly; protein heterooligomerization		2
ENSRNOG00000012297	2008-03-01	membrane-associated ring finger (C3HC4) 8			2
ENSRNOG00000012318	Aspm	asp (abnormal spindle) homolog, microcephaly associated (Drosophila)	negative regulation of neuron differentiation; peptide cross-linking		2
ENSRNOG00000012390	Npw	neuropeptide W	feeding behavior; neuropeptide signaling pathway		2
ENSRNOG00000012460	Cntf	ciliary neurotrophic factor	cell differentiation; growth; multicellular organismal development; muscle organ morphogenesis; negative regulation of neuron apoptosis; nervous system development; neuron development; neuroprotection; positive regulation of JAK-STAT cascade; positive regulation of MAPKKK cascade; positive regulation of cell growth; positive regulation of cell proliferation; positive regulation of hormone secreti…	rno04060:Cytokine-cytokine receptor interaction; rno04630:Jak-STAT signaling pathway	2
ENSRNOG00000012473	C0H5Y5_RAT	CASP8 and FADD-like apoptosis regulator	anti-apoptosis; apoptosis; positive regulation of I-kappaB kinase/NF-kappaB cascade; proteolysis; regulation of apoptosis	rno04210:Apoptosis	2
ENSRNOG00000012486	Prim2	primase, DNA, polypeptide 2	DNA replication; transcription	rno00230:Purine metabolism; rno00240:Pyrimidine metabolism; rno03030:DNA replication	2
ENSRNOG00000012534	Mfsd10	major facilitator superfamily domain containing 10	transmembrane transport; transport		2
ENSRNOG00000012543	Mcm3	minichromosome maintenance complex component 3; similar to DNA replication licensing factor MCM3 (DNA polymerase alpha holoenzyme-associated protein P1) (P1-MCM3)	DNA replication; DNA replication initiation	rno03030:DNA replication; rno04110:Cell cycle	2
ENSRNOG00000012582	Eif4ebp1	eukaryotic translation initiation factor 4E binding protein 1	insulin receptor signaling pathway; negative regulation of translational initiation	rno04012:ErbB signaling pathway; rno04150:mTOR signaling pathway; rno04910:Insulin signaling pathway; rno05221:Acute myeloid leukemia	2
ENSRNOG00000012601	Leprotl1	leptin receptor overlapping transcript-like 1			2
ENSRNOG00000012678	Ccnb2	cyclin B2	cell cycle; cell division	rno04110:Cell cycle; rno04114:Oocyte meiosis; rno04115:p53 signaling pathway; rno04914:Progesterone-mediated oocyte maturation	2
ENSRNOG00000012803	WDR61_RAT	WD repeat domain 61		rno03018:RNA degradation	2
ENSRNOG00000012828	Emg1	EMG1 nucleolar protein homolog (S. cerevisiae)			2
ENSRNOG00000012832	RGD1305138	major facilitator superfamily domain containing 5	transmembrane transport		2
ENSRNOG00000012873	Gfm1	G elongation factor, mitochondrial 1	translational elongation		2
ENSRNOG00000012956	Tgm2	transglutaminase 2, C polypeptide	elevation of cytosolic calcium ion concentration during G-protein signaling, coupled to IP3 second messenger (phospholipase C activating); blood vessel remodeling; branching involved in salivary gland morphogenesis; induction of apoptosis; peptide cross-linking; positive regulation of I-kappaB kinase/NF-kappaB cascade; positive regulation of cell adhesion; positive regulation of inflammatory resp…	rno05016:Huntington's disease	2
ENSRNOG00000012989	Serinc2	serine incorporator 2	L-serine transport; phosphatidylserine metabolic process; positive regulation of transferase activity; sphingolipid metabolic process		2
ENSRNOG00000013005	Rpa2	replication protein A2	DNA replication; base-excision repair	rno03030:DNA replication; rno03420:Nucleotide excision repair; rno03430:Mismatch repair; rno03440:Homologous recombination	2
ENSRNOG00000013009	Ldha	lactate dehydrogenase A	anaerobic glycolysis; carbohydrate metabolic process; cellular carbohydrate metabolic process; glycolysis; lactate metabolic process; metabolic process; oxidation reduction; positive regulation of apoptosis; response to cAMP; response to drug; response to estrogen stimulus; response to glucose stimulus; response to hydrogen peroxide; response to hypoxia; response to nutrient; response to organic …	rno00010:Glycolysis / Gluconeogenesis; rno00270:Cysteine and methionine metabolism; rno00620:Pyruvate metabolism; rno00640:Propanoate metabolism	2
ENSRNOG00000013028	AL1A3_RAT	aldehyde dehydrogenase 1 family, member A3	embryonic camera-type eye development; embryonic eye morphogenesis; face development; kidney development; metabolic process; oxidation reduction; pituitary gland development; positive regulation of apoptosis; response to drug; retinal metabolic process; retinoic acid metabolic process	rno00010:Glycolysis / Gluconeogenesis; rno00340:Histidine metabolism; rno00350:Tyrosine metabolism; rno00360:Phenylalanine metabolism; rno00980:Metabolism of xenobiotics by cytochrome P450; rno00982:Drug metabolism	2
ENSRNOG00000013057	Prc1	protein regulator of cytokinesis 1			2
ENSRNOG00000013162	Zcchc12	zinc finger, CCHC domain containing 12	regulation of transcription		2
ENSRNOG00000013179	Tinagl1	tubulointerstitial nephritis antigen-like 1	immune response; proteolysis; transport		2
ENSRNOG00000013231	Ptafr	platelet-activating factor receptor	chemotaxis; cytokine production; inflammatory response; phosphoinositide-mediated signaling; response to lipopolysaccharide; signal transduction	rno04020:Calcium signaling pathway; rno04080:Neuroactive ligand-receptor interaction	2
ENSRNOG00000013304	Arg1	arginase, liver	female pregnancy; response to wounding; urea cycle	rno00330:Arginine and proline metabolism	2
ENSRNOG00000013376	Mvd	mevalonate (diphospho) decarboxylase	cholesterol biosynthetic process; isoprenoid biosynthetic process; phosphorylation; positive regulation of cell proliferation; response to drug	rno00900:Terpenoid backbone biosynthesis	2
ENSRNOG00000013492	Cap1	CAP, adenylate cyclase-associated protein 1 (yeast)	actin cytoskeleton organization; cell morphogenesis; cytoskeleton organization; receptor-mediated endocytosis		2
ENSRNOG00000013521	Dhfr	dihydrofolate reductase	nucleotide biosynthetic process; one-carbon metabolic process; oxidation reduction; response to nicotine	rno00670:One carbon pool by folate; rno00790:Folate biosynthesis	2
ENSRNOG00000013536	Cdc42	cell division cycle 42 (GTP binding protein)	cellular protein localization; establishment of cell polarity; filopodium assembly; intracellular protein transport; nucleocytoplasmic transport; positive regulation of DNA replication; positive regulation of JNK cascade; positive regulation of phosphoinositide 3-kinase activity; protein transport; regulation of exocytosis; regulation of mitosis; response to glucose stimulus; signal transduction;…	rno04010:MAPK signaling pathway; rno04062:Chemokine signaling pathway; rno04144:Endocytosis; rno04360:Axon guidance; rno04370:VEGF signaling pathway; rno04510:Focal adhesion; rno04520:Adherens junction; rno04530:Tight junction; rno04660:T cell receptor signaling pathway; rno04666:Fc gamma R-mediated phagocytosis; rno04670:Leukocyte transendothelial migration; rno04722:Neurotrophin signaling pathw…	2
ENSRNOG00000013578	Trem2	triggering receptor expressed on myeloid cells 2			2
ENSRNOG00000013603	Dffa	DNA fragmentation factor, alpha subunit	DNA fragmentation involved in apoptosis; apoptosis; induction of apoptosis; negative regulation of apoptosis	rno04210:Apoptosis	2
ENSRNOG00000013636	Ppil3	peptidylprolyl isomerase (cyclophilin)-like 3	RNA splicing; mRNA processing; protein folding		2
ENSRNOG00000013668	Capg	capping protein (actin filament), gelsolin-like	actin filament capping; cell projection assembly		2
ENSRNOG00000013727	Ndc80	NDC80 homolog, kinetochore complex component (S. cerevisiae)	chromosome segregation; establishment of mitotic spindle orientation; mitotic spindle organization		2
ENSRNOG00000013745	Ctrc	chymotrypsin C (caldecrin)	proteolysis		2
ENSRNOG00000013774	Lmnb1	lamin B1			2
ENSRNOG00000013912	ZNT7_RAT	solute carrier family 30 (zinc transporter), member 7	cation transport; transmembrane transport; zinc ion transport		2
ENSRNOG00000013933	Med27	mediator complex subunit 27	regulation of transcription from RNA polymerase II promoter		2
ENSRNOG00000013954	Alpl	alkaline phosphatase, liver/bone/kidney	metabolic process; response to antibiotic; response to glucocorticoid stimulus; response to vitamin D	rno00790:Folate biosynthesis	2
ENSRNOG00000013970	Cdt1	chromatin licensing and DNA replication factor 1			2
ENSRNOG00000013973	Lcn2	lipocalin 2	response to virus; transport		2
ENSRNOG00000013977	Bzw1	basic leucine zipper and W2 domains 1	regulation of transcription		2
ENSRNOG00000013992	Arfrp1	ADP-ribosylation factor related protein 1	gastrulation; intracellular protein transport; protein transport; small GTPase mediated signal transduction		2
ENSRNOG00000014008	Mfsd2	major facilitator superfamily domain containing 2	transmembrane transport		2
ENSRNOG00000014080	Kif23	kinesin family member 23	microtubule-based movement		2
ENSRNOG00000014117	Hmox1	heme oxygenase (decycling) 1	DNA damage response, signal transduction resulting in induction of apoptosis; angiogenesis; cell death; iron ion homeostasis; negative regulation of cell proliferation; negative regulation of transcription factor activity; oxidation reduction; phospholipid metabolic process; positive regulation of I-kappaB kinase/NF-kappaB cascade; positive regulation of anti-apoptosis; protein homooligomerizatio…	rno00860:Porphyrin and chlorophyll metabolism	2
ENSRNOG00000014130	Cks2	CDC28 protein kinase regulatory subunit 2	cell cycle		2
ENSRNOG00000014142	Ogfrl1	opioid growth factor receptor-like 1			2
ENSRNOG00000014336	B2GUX3_RAT	minichromosome maintenance complex component 5	DNA replication; DNA replication initiation	rno03030:DNA replication; rno04110:Cell cycle	2
ENSRNOG00000014355	Cisd2	CDGSH iron sulfur domain 2	multicellular organismal aging		2
ENSRNOG00000014378	Il1r2	interleukin 1 receptor, type II		rno04010:MAPK signaling pathway; rno04060:Cytokine-cytokine receptor interaction; rno04640:Hematopoietic cell lineage	2
ENSRNOG00000014548	Nedd9	neural precursor cell expressed, developmentally down-regulated 9			2
ENSRNOG00000014645	Aldh7a1	aldehyde dehydrogenase 7 family, member A1	metabolic process; oxidation reduction	rno00010:Glycolysis / Gluconeogenesis; rno00053:Ascorbate and aldarate metabolism; rno00071:Fatty acid metabolism; rno00280:Valine, leucine and isoleucine degradation; rno00310:Lysine degradation; rno00330:Arginine and proline metabolism; rno00340:Histidine metabolism; rno00380:Tryptophan metabolism; rno00410:beta-Alanine metabolism; rno00561:Glycerolipid metabolism; rno00620:Pyruvate metabolism;…	2
ENSRNOG00000014659	Ebpl	emopamil binding protein-like			2
ENSRNOG00000014828	Avpi1	arginine vasopressin-induced 1	cell cycle		2
ENSRNOG00000014835	Il1rl1	interleukin 1 receptor-like 1	innate immune response; negative regulation of I-kappaB kinase/NF-kappaB cascade; signal transduction		2
ENSRNOG00000014901	Ugcgl1	UDP-glucose glycoprotein glucosyltransferase 1	protein amino acid glycosylation; protein folding		2
ENSRNOG00000014945	Kpna3	karyopherin alpha 3	intracellular protein transport; protein import into nucleus		2
ENSRNOG00000014960	Bard1	BRCA1 associated RING domain 1	DNA repair; modification-dependent protein catabolic process; negative regulation of apoptosis; positive regulation of apoptosis; regulation of phosphorylation; response to DNA damage stimulus		2
ENSRNOG00000015079	OST48_RAT	dolichyl-diphosphooligosaccharide-protein glycosyltransferase	T cell activation; protein amino acid N-linked glycosylation via asparagine; response to cytokine stimulus	rno00510:N-Glycan biosynthesis	2
ENSRNOG00000015124	Gpam	glycerol-3-phosphate acyltransferase, mitochondrial	acyl-CoA metabolic process; defense response to virus; fatty acid metabolic process; metabolic process; phospholipid biosynthetic process; positive regulation of activated T cell proliferation; positive regulation of multicellular organism growth; response to glucose stimulus; triglyceride biosynthetic process	rno00561:Glycerolipid metabolism; rno00564:Glycerophospholipid metabolism	2
ENSRNOG00000015131	Ube2c	ubiquitin-conjugating enzyme E2C	post-translational protein modification; protein K11-linked ubiquitination; regulation of protein metabolic process; ubiquitin-dependent protein catabolic process	rno04120:Ubiquitin mediated proteolysis	2
ENSRNOG00000015308	Pbk	PDZ binding kinase	protein amino acid phosphorylation		2
ENSRNOG00000015340	LOC362526	DnaJ (Hsp40) homolog, subfamily C, member 25			2
ENSRNOG00000015411	Apobec1	apolipoprotein B mRNA editing enzyme, catalytic polypeptide 1	cellular response to insulin stimulus; defense response to virus; lipoprotein biosynthetic process; lipoprotein transport; mRNA modification; mRNA processing; mRNA stabilization; regulation of cell proliferation; response to calcium ion; response to drug; response to ethanol; response to gamma radiation; response to osmotic stress; response to zinc ion		2
ENSRNOG00000015423	Ccna2	cyclin A2	Ras protein signal transduction; cell cycle; cell division; organ regeneration; positive regulation of fibroblast proliferation; positive regulation of transcription; response to estradiol stimulus; response to glucagon stimulus	rno04110:Cell cycle; rno04914:Progesterone-mediated oocyte maturation	2
ENSRNOG00000015441	Il4ra	interleukin 4 receptor, alpha	immune response; inflammatory response	rno04060:Cytokine-cytokine receptor interaction; rno04630:Jak-STAT signaling pathway; rno04640:Hematopoietic cell lineage	2
ENSRNOG00000015496	Tpm4	tropomyosin 4	muscle contraction	rno04260:Cardiac muscle contraction; rno05410:Hypertrophic cardiomyopathy (HCM); rno05414:Dilated cardiomyopathy	2
ENSRNOG00000015529	Cdca3	cell division cycle associated 3	cell cycle; cell division; mitosis; modification-dependent protein catabolic process		2
ENSRNOG00000015627	Slc35a3	solute carrier family 35 (UDP-N-acetylglucosamine (UDP-GlcNAc) transporter), member A3	carbohydrate transport; nucleotide-sugar transport; transmembrane transport		2
ENSRNOG00000015631	Ippk	inositol 1,3,4,5,6-pentakisphosphate 2-kinase		rno00562:Inositol phosphate metabolism; rno04070:Phosphatidylinositol signaling system	2
ENSRNOG00000015669	Kctd11	potassium channel tetramerisation domain containing 11	cell differentiation; nervous system development; potassium ion transport; regulation of cell proliferation		2
ENSRNOG00000015787	Sc65	synaptonemal complex protein SC65			2
ENSRNOG00000015810	Trip13	thyroid hormone receptor interactor 13	double-strand break repair; male meiosis I; oocyte maturation; pachytene; reciprocal meiotic recombination; spermatid development		2
ENSRNOG00000015845	Fam129b	family with sequence similarity 129, member B			2
ENSRNOG00000016036	Rprd1a	regulation of nuclear pre-mRNA domain containing 1A			2
ENSRNOG00000016066	Bambi	BMP and activin membrane-bound inhibitor, homolog (Xenopus laevis)	cell migration; negative regulation of transforming growth factor beta receptor signaling pathway; positive regulation of epithelial to mesenchymal transition; regulation of cell shape; transforming growth factor beta receptor signaling pathway		2
ENSRNOG00000016122	Hmgcr	3-hydroxy-3-methylglutaryl-Coenzyme A reductase	cholesterol biosynthetic process; embryonic development; isoprenoid biosynthetic process; negative regulation of MAP kinase activity; oxidation reduction; visual learning	rno00900:Terpenoid backbone biosynthesis	2
ENSRNOG00000016148	Gtse1	G-2 and S-phase expressed 1		rno04115:p53 signaling pathway	2
ENSRNOG00000016188	Mxd3	Max dimerization protein 3	negative regulation of transcription; regulation of transcription		2
ENSRNOG00000016362	Gpr4	G protein-coupled receptor 4	signal transduction		2
ENSRNOG00000016371	RGD1306962	similar to dJ55C23.6 gene product	transmembrane transport		2
ENSRNOG00000016377	Cep55	centrosomal protein 55	cell cycle; cell division; mitosis		2
ENSRNOG00000016413	Pstpip1	proline-serine-threonine phosphatase-interacting protein 1		rno04621:NOD-like receptor signaling pathway	2
ENSRNOG00000016433	Prrc1	proline-rich coiled-coil 1			2
ENSRNOG00000016452	Creb3	cAMP responsive element binding protein 3	regulation of transcription		2
ENSRNOG00000016552	Hmgcs1	3-hydroxy-3-methylglutaryl-Coenzyme A synthase 1 (soluble)	cholesterol biosynthetic process; isoprenoid biosynthetic process; metabolic process; response to drug; response to organic nitrogen	rno00072:Synthesis and degradation of ketone bodies; rno00280:Valine, leucine and isoleucine degradation; rno00650:Butanoate metabolism; rno00900:Terpenoid backbone biosynthesis	2
ENSRNOG00000016561	Ns5atp9	NS5A (hepatitis C virus) transactivated protein 9			2
ENSRNOG00000016597	Fam18b2	family with sequence similarity 18, member B2; hypothetical protein LOC100361288; hypothetical protein LOC100364907			2
ENSRNOG00000016690	Idi1	isopentenyl-diphosphate delta isomerase 1	cholesterol biosynthetic process; isoprenoid biosynthetic process	rno00900:Terpenoid backbone biosynthesis	2
ENSRNOG00000016708	E2f1	E2F transcription factor 1	G1/S transition of mitotic cell cycle; apoptosis; forebrain development; positive regulation of transcription from RNA polymerase II promoter; regulation of cell cycle	rno04110:Cell cycle; rno05200:Pathways in cancer; rno05212:Pancreatic cancer; rno05214:Glioma; rno05215:Prostate cancer; rno05218:Melanoma; rno05219:Bladder cancer; rno05220:Chronic myeloid leukemia; rno05222:Small cell lung cancer; rno05223:Non-small cell lung cancer	2
ENSRNOG00000016715	Kif11	kinesin family member 11	microtubule-based movement		2
ENSRNOG00000016727	Akr1a1	aldo-keto reductase family 1, member A1 (aldehyde reductase)	oxidation reduction	rno00010:Glycolysis / Gluconeogenesis; rno00561:Glycerolipid metabolism	2
ENSRNOG00000016733	Rab13	RAB13, member RAS oncogene family	intracellular protein transport; nucleocytoplasmic transport; protein transport; signal transduction; small GTPase mediated signal transduction	rno04530:Tight junction	2
ENSRNOG00000016945	Pla2g2a	phospholipase A2, group IIA (platelets, synovial fluid)	lipid catabolic process; negative regulation of epithelial cell proliferation; phospholipid metabolic process; somatic stem cell maintenance	rno00564:Glycerophospholipid metabolism; rno00565:Ether lipid metabolism; rno00590:Arachidonic acid metabolism; rno00591:Linoleic acid metabolism; rno00592:alpha-Linolenic acid metabolism; rno04010:MAPK signaling pathway; rno04270:Vascular smooth muscle contraction; rno04370:VEGF signaling pathway; rno04664:Fc epsilon RI signaling pathway; rno04730:Long-term depression; rno04912:GnRH signaling pa…	2
ENSRNOG00000016965	Anapc1	anaphase promoting complex subunit 1		rno04110:Cell cycle; rno04114:Oocyte meiosis; rno04120:Ubiquitin mediated proteolysis; rno04914:Progesterone-mediated oocyte maturation	2
ENSRNOG00000017036	Sec11c	SEC11 homolog C (S. cerevisiae)	proteolysis; signal peptide processing		2
ENSRNOG00000017063	Fcn1	ficolin (collagen/fibrinogen domain containing) 1	signal transduction		2
ENSRNOG00000017071	MGC94542	similar to RIKEN cDNA 5430437P03	G2/M transition DNA damage checkpoint; chromatin modification; double-strand break repair; positive regulation of DNA repair; protein K63-linked deubiquitination; response to DNA damage stimulus; response to ionizing radiation		2
ENSRNOG00000017090	RGD1308706	similar to RIKEN cDNA 4921524J17			2
ENSRNOG00000017099	Nsdhl	NAD(P) dependent steroid dehydrogenase-like	biosynthetic process; cellular metabolic process; cholesterol biosynthetic process; extracellular polysaccharide biosynthetic process; hair follicle development; labyrinthine layer blood vessel development; metabolic process; oxidation reduction; smoothened signaling pathway	rno00100:Steroid biosynthesis	2
ENSRNOG00000017150	Med10	mediator complex subunit 10			2
ENSRNOG00000017223	Plg	plasminogen	apoptosis; blood coagulation; induction of apoptosis; labyrinthine layer blood vessel development; muscle homeostasis; myoblast differentiation; proteolysis; proteolysis involved in cellular protein catabolic process; tissue regeneration; tissue remodeling; trophoblast giant cell differentiation	rno04080:Neuroactive ligand-receptor interaction; rno04610:Complement and coagulation cascades	2
ENSRNOG00000017260	Cdr2	cerebellar degeneration-related 2			2
ENSRNOG00000017441	Tpm3_v1	tropomyosin 3, gamma	brain development; chemotaxis; signal transduction	rno04260:Cardiac muscle contraction; rno05200:Pathways in cancer; rno05216:Thyroid cancer; rno05410:Hypertrophic cardiomyopathy (HCM); rno05414:Dilated cardiomyopathy	2
ENSRNOG00000017510	Mfge8	milk fat globule-EGF factor 8 protein	phagocytosis, engulfment; "phagocytosis, recognition"; cell adhesion; positive regulation of cell proliferation; positive regulation of phagocytosis; response to estrogen stimulus; single fertilization		2
ENSRNOG00000017558	Tubb2a	tubulin, beta 2a	microtubule-based movement; microtubule-based process; protein polymerization	rno04540:Gap junction	2
ENSRNOG00000017569	Mastl	microtubule associated serine/threonine kinase-like	protein amino acid phosphorylation		2
ENSRNOG00000017575	RGD1311055	GINS complex subunit 2 (Psf2 homolog)			2
ENSRNOG00000017654	Cox4nb	COX4 neighbor			2
ENSRNOG00000017708	Pcbp1	poly(rC) binding protein 1		rno03040:Spliceosome	2
ENSRNOG00000017900	rnf141	ring finger protein 141			2
ENSRNOG00000017962	Serpinb6a	serine (or cysteine) peptidase inhibitor, clade B, member 6a			2
ENSRNOG00000017979	Mrto4	mRNA turnover 4 homolog (S. cerevisiae)			2
ENSRNOG00000017981	Mcm10	minichromosome maintenance complex component 10			2
ENSRNOG00000018054	F2rl2	coagulation factor II (thrombin) receptor-like 2	blood coagulation; response to wounding; signal transduction	rno04080:Neuroactive ligand-receptor interaction	2
ENSRNOG00000018151	Isg20	interferon stimulated exonuclease gene 20	response to virus		2
ENSRNOG00000018187	Racgap1	Rac GTPase-activating protein 1	cytokinesis; embryonic development; intracellular signaling cascade; neuroblast proliferation; signal transduction; spermatogenesis; sulfate transport		2
ENSRNOG00000018291	Vkorc1l1	vitamin K epoxide reductase complex, subunit 1-like 1			2
ENSRNOG00000018358	Nt5dc2	5'-nucleotidase domain containing 2			2
ENSRNOG00000018367	Taldo1	transaldolase 1	carbohydrate metabolic process; fructose 6-phosphate metabolic process; metabolic process; pentose-phosphate shunt	rno00030:Pentose phosphate pathway	2
ENSRNOG00000018373	RGD1565416	talin 2	cell adhesion		2
ENSRNOG00000018488	Cd40	CD40 molecule, TNF receptor superfamily member 5	B cell activation; inflammatory response; positive regulation of B cell proliferation; positive regulation of I-kappaB kinase/NF-kappaB cascade; positive regulation of interleukin-12 production; positive regulation of isotype switching to IgG isotypes; regulation of immune response	rno04060:Cytokine-cytokine receptor interaction; rno04514:Cell adhesion molecules (CAMs); rno04620:Toll-like receptor signaling pathway; rno04672:Intestinal immune network for IgA production; rno05310:Asthma; rno05320:Autoimmune thyroid disease; rno05322:Systemic lupus erythematosus; rno05330:Allograft rejection; rno05340:Primary immunodeficiency; rno05416:Viral myocarditis	2
ENSRNOG00000018507	Gfpt1	glutamine fructose-6-phosphate transaminase 1	carbohydrate biosynthetic process; carbohydrate metabolic process; cellular response to insulin stimulus; fructose 6-phosphate metabolic process; glutamine metabolic process; metabolic process; protein homotetramerization; response to sucrose stimulus	rno00250:Alanine, aspartate and glutamate metabolism; rno00520:Amino sugar and nucleotide sugar metabolism	2
ENSRNOG00000018669	Jak3	Janus kinase 3	cytokine-mediated signaling pathway; elevation of cytosolic calcium ion concentration; peptidyl-tyrosine phosphorylation; positive regulation of activated T cell proliferation; positive regulation of calcium ion transport; positive regulation of immune response; protein amino acid autophosphorylation; protein amino acid phosphorylation; protein kinase cascade; proteolysis	rno04062:Chemokine signaling pathway; rno04630:Jak-STAT signaling pathway; rno05340:Primary immunodeficiency	2
ENSRNOG00000018714	Q5BK02_RAT	ADP-ribosylation factor-like 5B	intracellular protein transport; protein transport; small GTPase mediated signal transduction		2
ENSRNOG00000018761	Eif3c	eukaryotic translation initiation factor 3, subunit C	translational initiation		2
ENSRNOG00000018770	Pmaip1	phorbol-12-myristate-13-acetate-induced protein 1	induction of apoptosis by intracellular signals; negative regulation of fibroblast proliferation; positive regulation of neuron apoptosis; release of cytochrome c from mitochondria; response to DNA damage stimulus; response to UV; response to X-ray	rno04115:p53 signaling pathway	2
ENSRNOG00000018771	Ncapd2	non-SMC condensin I complex, subunit D2	chromosome condensation; mitosis; mitotic chromosome condensation		2
ENSRNOG00000018782	Gmnn	geminin	negative regulation of DNA replication; negative regulation of cell cycle; organ morphogenesis		2
ENSRNOG00000018815	Plk1	polo-like kinase 1 (Drosophila)	cell cycle; cell division; protein amino acid phosphorylation; response to antibiotic	rno04110:Cell cycle; rno04114:Oocyte meiosis; rno04914:Progesterone-mediated oocyte maturation	2
ENSRNOG00000018824	Slc7a5	solute carrier family 7 (cationic amino acid transporter, y+ system), member 5	L-amino acid transport; amino acid transport; cell differentiation; multicellular organismal development; nervous system development; neutral amino acid transport; transmembrane transport; transport		2
ENSRNOG00000018874	Phf19	PHD finger protein 19			2
ENSRNOG00000018884	Ttc13	tetratricopeptide repeat domain 13			2
ENSRNOG00000018898	Mpi	mannose phosphate isomerase (mapped)	carbohydrate metabolic process	rno00051:Fructose and mannose metabolism; rno00520:Amino sugar and nucleotide sugar metabolism	2
ENSRNOG00000018929	Kif20b	kinesin family member 20B	microtubule-based movement		2
ENSRNOG00000018933	Rfwd3	ring finger and WD repeat domain 3			2
ENSRNOG00000018939	Rexo2	REX2, RNA exonuclease 2 homolog (S. cerevisiae)	nucleobase, nucleoside, nucleotide and nucleic acid metabolic process		2
ENSRNOG00000019014	Ndst1	N-deacetylase/N-sulfotransferase (heparan glucosaminyl) 1	MAPKKK cascade; embryonic development; fibroblast growth factor receptor signaling pathway; forebrain development; glycosaminoglycan metabolic process; inflammatory response; midbrain development; organ morphogenesis; respiratory gaseous exchange; smoothened signaling pathway	rno00534:Heparan sulfate biosynthesis	2
ENSRNOG00000019047	Ola1	Obg-like ATPase 1	ATP catabolic process		2
ENSRNOG00000019105	Dpp8	dipeptidylpeptidase 8	proteolysis		2
ENSRNOG00000019174	Chtf18	CTF18, chromosome transmission fidelity factor 18 homolog (S. cerevisiae)			2
ENSRNOG00000019189	Acat2	acetyl-Coenzyme A acetyltransferase 3	metabolic process	rno00071:Fatty acid metabolism; rno00072:Synthesis and degradation of ketone bodies; rno00280:Valine, leucine and isoleucine degradation; rno00310:Lysine degradation; rno00380:Tryptophan metabolism; rno00620:Pyruvate metabolism; rno00640:Propanoate metabolism; rno00650:Butanoate metabolism; rno00900:Terpenoid backbone biosynthesis	2
ENSRNOG00000019202	PVR	poliovirus receptor	cell migration; cell-cell adhesion; positive regulation of natural killer cell mediated cytotoxicity directed against tumor cell target	rno04514:Cell adhesion molecules (CAMs)	2
ENSRNOG00000019208	P2rx5	purinergic receptor P2X, ligand-gated ion channel, 5	cation transport; ion transport; protein homooligomerization; regulation of action potential in neuron	rno04020:Calcium signaling pathway; rno04080:Neuroactive ligand-receptor interaction	2
ENSRNOG00000019215	Cd151	CD151 molecule (Raph blood group)			2
ENSRNOG00000019222	MGC112830	similar to transcription factor	positive regulation of transcription, DNA-dependent; S phase of mitotic cell cycle; apoptosis; epidermis development	rno04110:Cell cycle; rno04350:TGF-beta signaling pathway	2
ENSRNOG00000019330	Procr	protein C receptor, endothelial	antigen processing and presentation; blood coagulation; immune response		2
ENSRNOG00000019352	Tmem93	transmembrane protein 93			2
ENSRNOG00000019450	Etf1	eukaryotic translation termination factor 1	protein amino acid methylation		2
ENSRNOG00000019465	Gnai3	guanine nucleotide binding protein (G protein), alpha inhibiting 1; "guanine nucleotide binding protein (G protein), alpha inhibiting 3"	signal transduction; small GTPase mediated signal transduction; vesicle fusion	rno04062:Chemokine signaling pathway; rno04360:Axon guidance; rno04530:Tight junction; rno04540:Gap junction; rno04670:Leukocyte transendothelial migration; rno04730:Long-term depression; rno04914:Progesterone-mediated oocyte maturation; rno04916:Melanogenesis	2
ENSRNOG00000019572	Lsm4	LSM4 homolog, U6 small nuclear RNA associated (S. cerevisiae)		rno03018:RNA degradation; rno03040:Spliceosome	2
ENSRNOG00000019582	Mthfd1l	methylenetetrahydrofolate dehydrogenase (NADP+ dependent) 1-like	folic acid and derivative biosynthetic process; metabolic process; one-carbon metabolic process		2
ENSRNOG00000019584	Dlk1	delta-like 1 homolog (Drosophila)	cell communication; cell differentiation; embryonic development; embryonic skeletal system development; post-embryonic development		2
ENSRNOG00000019634	Eif4e2	eukaryotic translation initiation factor 4E family member 2	translational initiation		2
ENSRNOG00000019643	Pcyox1l	prenylcysteine oxidase 1 like; similar to chloride ion pump-associated 55 kDa protein	oxidation reduction		2
ENSRNOG00000019692	Metrn	meteorin, glial cell differentiation regulator	glial cell differentiation; multicellular organismal development; nervous system development; positive regulation of axonogenesis		2
ENSRNOG00000019813	Ppp4c	protein phosphatase 4, catalytic subunit			2
ENSRNOG00000019838	Gmfg	glia maturation factor, gamma			2
ENSRNOG00000019943	Slc7a6	solute carrier family 7 (cationic amino acid transporter, y+ system), member 6	amino acid transport; transmembrane transport; transport		2
ENSRNOG00000019949	Mrps12	mitochondrial ribosomal protein S12	translation		2
ENSRNOG00000019999	Lypd3	Ly6/Plaur domain containing 3			2
ENSRNOG00000020136	Tgm1	transglutaminase 1, K polypeptide	keratinization; organ morphogenesis; peptide cross-linking		2
ENSRNOG00000020213	Tubg1	tubulin, gamma 1	microtubule-based process; protein polymerization		2
ENSRNOG00000020245	Syt8	synaptotagmin VIII	acrosome reaction; transport		2
ENSRNOG00000020281	Kif22	kinesin family member 22	DNA repair; microtubule-based movement		2
ENSRNOG00000020315	Taf13	TAF13 RNA polymerase II, TATA box binding protein (TBP)-associated factor	transcription from RNA polymerase II promoter	rno03022:Basal transcription factors	2
ENSRNOG00000020393	Rhog	ras homolog gene family, member G (rho G)	Rac protein signal transduction; Rho protein signal transduction; actin cytoskeleton organization; intracellular protein transport; nucleocytoplasmic transport; positive regulation of transcription; protein transport; signal transduction; small GTPase mediated signal transduction		2
ENSRNOG00000020433	Actn4	actinin alpha 4	actin filament bundle formation; positive regulation of cellular component movement; protein transport; regulation of apoptosis; response to hypoxia	rno04510:Focal adhesion; rno04520:Adherens junction; rno04530:Tight junction; rno04670:Leukocyte transendothelial migration; rno04810:Regulation of actin cytoskeleton; rno05322:Systemic lupus erythematosus; rno05412:Arrhythmogenic right ventricular cardiomyopathy (ARVC)	2
ENSRNOG00000020456	Nucb2	nucleobindin 2			2
ENSRNOG00000020480	Fads1	fatty acid desaturase 1	aging; arachidonic acid metabolic process; cellular response to starvation; electron transport chain; fatty acid biosynthetic process; lipid metabolic process; oxidation reduction; response to insulin stimulus; response to nutrient; response to organic cyclic substance; response to stress; response to sucrose stimulus; response to vitamin A; transport	rno01040:Biosynthesis of unsaturated fatty acids	2
ENSRNOG00000020531	Fen1	flap structure-specific endonuclease 1	DNA repair; DNA replication	rno03030:DNA replication; rno03410:Base excision repair; rno03450:Non-homologous end-joining	2
ENSRNOG00000020552	Fosl1	fos-like antigen 1	cellular response to extracellular stimulus; female pregnancy; learning; negative regulation of cell proliferation; positive regulation of apoptosis; positive regulation of cell cycle; regulation of transcription; response to cAMP; response to corticosterone stimulus; response to cytokine stimulus; response to drug; response to gravity; response to hydrogen peroxide; response to mechanical stimul…	rno04310:Wnt signaling pathway	2
ENSRNOG00000020554	Rag1ap1	recombination activating gene 1 activating protein 1			2
ENSRNOG00000020614	A0T2W6_RAT	pleckstrin homology-like domain, family A, member 2	organ morphogenesis		2
ENSRNOG00000020652	Tgfb1	transforming growth factor, beta 1	ATP biosynthetic process; G1/S transition checkpoint; SMAD protein complex assembly; T cell homeostasis; aging; cell cycle arrest; cell death; cell-cell junction organization; cellular calcium ion homeostasis; embryonic development; endoderm development; epidermal growth factor receptor signaling pathway; female pregnancy; germ cell migration; growth; gut development; induction of apoptosis; infl…	rno04010:MAPK signaling pathway; rno04110:Cell cycle; rno04350:TGF-beta signaling pathway; rno04672:Intestinal immune network for IgA production; rno05200:Pathways in cancer; rno05210:Colorectal cancer; rno05211:Renal cell carcinoma; rno05212:Pancreatic cancer; rno05220:Chronic myeloid leukemia; rno05410:Hypertrophic cardiomyopathy (HCM); rno05414:Dilated cardiomyopathy	2
ENSRNOG00000020679	Icam1	intercellular adhesion molecule 1	leukocyte adhesion; leukocyte migration; membrane to membrane docking; positive regulation of NF-kappaB transcription factor activity; positive regulation of nitric oxide biosynthetic process; regulation of cell adhesion	rno04514:Cell adhesion molecules (CAMs); rno04650:Natural killer cell mediated cytotoxicity; rno04670:Leukocyte transendothelial migration; rno05416:Viral myocarditis	2
ENSRNOG00000020776	Dhcr7	7-dehydrocholesterol reductase	blood vessel development; cell differentiation; lung development; multicellular organism growth; oxidation reduction; post-embryonic development; regulation of cell proliferation; regulation of cholesterol biosynthetic process	rno00100:Steroid biosynthesis	2
ENSRNOG00000020823	Cttn	cortactin	receptor-mediated endocytosis	rno04530:Tight junction	2
ENSRNOG00000020889	Nucb1	nucleobindin 1			2
ENSRNOG00000020906	Pola2	polymerase (DNA directed), alpha 2	protein import into nucleus, translocation; DNA replication	rno00230:Purine metabolism; rno00240:Pyrimidine metabolism; rno03030:DNA replication	2
ENSRNOG00000020908	LOC303566	E2F1-inducible gene			2
ENSRNOG00000020970	Rap2ip	Rap2 interacting protein			2
ENSRNOG00000020989	Tm7sf2	transmembrane 7 superfamily member 2		rno00100:Steroid biosynthesis	2
ENSRNOG00000020991	Ms4a11	membrane-spanning 4-domains, subfamily A, member 11	signal transduction		2
ENSRNOG00000021031	Grn	granulin	embryo implantation; lipid catabolic process; phospholipid metabolic process; positive regulation of epithelial cell proliferation		2
ENSRNOG00000021062	Fxyd5	FXYD domain-containing ion transport regulator 5	ion transport		2
ENSRNOG00000021233	Itpa	inosine triphosphatase (nucleoside triphosphate pyrophosphatase)		rno00230:Purine metabolism; rno00240:Pyrimidine metabolism; rno00983:Drug metabolism	2
ENSRNOG00000021255	Smox	similar to polyamine oxidase isoform 2; spermine oxidase	tRNA processing		2
ENSRNOG00000021314	Fdft1	farnesyl diphosphate farnesyl transferase 1	biosynthetic process; cholesterol biosynthetic process; isoprenoid biosynthetic process; lipid biosynthetic process; oxidation reduction	rno00100:Steroid biosynthesis	2
ENSRNOG00000021357	Slfn3	schlafen 3			2
ENSRNOG00000021359	Mtfr1	mitochondrial fission regulator 1			2
ENSRNOG00000021555	RGD1310778	protein Mis18-alpha	cell cycle; cell division; mitosis		2
ENSRNOG00000021815	Lig3	ligase III, DNA, ATP-dependent	DNA recombination; DNA repair; DNA replication; response to DNA damage stimulus	rno03410:Base excision repair	2
ENSRNOG00000021847	SKA3_RAT	spindle and kinetochore associated complex subunit 3	cell cycle; cell division; chromosome segregation; mitosis		2
ENSRNOG00000022146	RGD1564767	histone cluster 1, H2af	nucleosome assembly	rno05322:Systemic lupus erythematosus	2
ENSRNOG00000022247	LOC361128	similar to TR4 orphan receptor associated protein TRA16	cell adhesion		2
ENSRNOG00000022325	Smc2	structural maintenance of chromosomes 2	chromosome organization; mitotic chromosome condensation; phosphoenolpyruvate-dependent sugar phosphotransferase system		2
ENSRNOG00000022537	E2f8	E2F transcription factor 8	cell proliferation		2
ENSRNOG00000022657	Tmem97	transmembrane protein 97			2
ENSRNOG00000022686	ZDHC2_RAT	zinc finger, DHHC-type containing 2	multicellular organismal development; protein palmitoylation		2
ENSRNOG00000022710	Prrg4	proline rich Gla (G-carboxyglutamic acid) 4 (transmembrane)			2
ENSRNOG00000022939	Gpkow	G patch domain and KOW motifs			2
ENSRNOG00000022975	Nfam1	NFAT activating protein with ITAM motif 1	intracellular signaling cascade; positive regulation of transcription factor activity; regulation of B cell differentiation; tRNA aminoacylation for protein translation; translation		2
ENSRNOG00000023272	Rrm2	ribonucleotide reductase M2	DNA replication; oxidation reduction		2
ENSRNOG00000023322	Ostc	oligosaccharyltransferase complex subunit			2
ENSRNOG00000023738	Ap1s3	adaptor-related protein complex 1, sigma 3 subunit; "adaptor-related protein complex AP-1, sigma 3-like"	intracellular protein transport; protein transport; transport; vesicle-mediated transport		2
ENSRNOG00000024043	Orc6l	origin recognition complex, subunit 6 like (yeast)	DNA replication	rno04110:Cell cycle	2
ENSRNOG00000024077	Fbxo5	F-box protein 5	oocyte maturation; regulation of meiosis; regulation of mitotic cell cycle; spindle assembly; vesicle organization	rno04114:Oocyte meiosis	2
ENSRNOG00000024170	Phf5a	PHD finger protein 5A	nuclear mRNA splicing, via spliceosome; "positive regulation of transcription, DNA-dependent"; RNA splicing; positive regulation of transcription	rno03040:Spliceosome	2
ENSRNOG00000024178	Cenpt	centromere protein T			2
ENSRNOG00000024382	Fcgr3a	Fc fragment of IgG, low affinity IIIa, receptor	immune response	rno04650:Natural killer cell mediated cytotoxicity; rno05322:Systemic lupus erythematosus	2
ENSRNOG00000024410	LOC681468	biliverdin reductase B (flavin reductase (NADPH)); similar to biliverdin reductase B (flavin reductase (NADPH))	cellular metabolic process; metabolic process; regulation of nitrogen utilization	rno00860:Porphyrin and chlorophyll metabolism	2
ENSRNOG00000024428	Kif20a	kinesin family member 20A	microtubule-based movement; signal transduction		2
ENSRNOG00000024470	Lman1	lectin, mannose-binding, 1	ER to Golgi vesicle-mediated transport; protein transport; vesicle-mediated transport		2
ENSRNOG00000024650	LOC687334	cytoskeleton associated protein 2			2
ENSRNOG00000024733	Mnd1	meiotic nuclear divisions 1 homolog (S. cerevisiae)			2
ENSRNOG00000024798	RGD1309522	similar to hypothetical protein FLJ22624	cell cycle; cell division; mitosis		2
ENSRNOG00000024818	Fam176b	family with sequence similarity 176, member B			2
ENSRNOG00000024975	Atp8b3	ATPase, Class I, type 8B, member 3	ATP biosynthetic process; binding of sperm to zona pellucida; metabolic process; phospholipid transport		2
ENSRNOG00000025117	Noxo1	NADPH oxidase organizer 1	cell communication; superoxide metabolic process		2
ENSRNOG00000025245	RGD1311946	similar to RIKEN cDNA 1810055G02			2
ENSRNOG00000025302	Cdca2	cell division cycle associated 2			2
ENSRNOG00000025742	Lmnb2	lamin B2			2
ENSRNOG00000025792	Crk	v-crk sarcoma virus CT10 oncogene homolog (avian)	activation of JUN kinase activity	rno04010:MAPK signaling pathway; rno04012:ErbB signaling pathway; rno04062:Chemokine signaling pathway; rno04510:Focal adhesion; rno04666:Fc gamma R-mediated phagocytosis; rno04722:Neurotrophin signaling pathway; rno04810:Regulation of actin cytoskeleton; rno04910:Insulin signaling pathway; rno05200:Pathways in cancer; rno05211:Renal cell carcinoma; rno05220:Chronic myeloid leukemia	2
ENSRNOG00000025979	Gramd2	GRAM domain containing 2			2
ENSRNOG00000025981	Ska2	hypothetical protein LOC691962; spindle and kinetochore associated complex subunit 2	cell cycle; cell division; chromosome segregation		2
ENSRNOG00000026128	Cpne8	copine VIII			2
ENSRNOG00000026136	Tnfaip8	tumor necrosis factor, alpha-induced protein 8			2
ENSRNOG00000026378	Casc5	cancer susceptibility candidate 5			2
ENSRNOG00000026753	Mpzl3	myelin protein zero-like 3	extracellular matrix organization		2
ENSRNOG00000026963	Tra1	heat shock protein 90, beta, member 1	ER-associated protein catabolic process; protein folding; response to stress	rno04621:NOD-like receptor signaling pathway; rno05200:Pathways in cancer; rno05215:Prostate cancer	2
ENSRNOG00000027030	Adm	adrenomedullin	aging; branching involved in embryonic placenta morphogenesis; cAMP-mediated signaling; developmental growth; elevation of cytosolic calcium ion concentration; female pregnancy; heart development; negative regulation of cell proliferation; neural tube closure; organ regeneration; positive regulation of anti-apoptosis; positive regulation of cell proliferation; positive regulation of vasodilation;…		2
ENSRNOG00000027079	Impad1	inositol monophosphatase domain containing 1	chondrocyte development; embryonic digit morphogenesis; endochondral ossification; post-embryonic development; skeletal system development		2
ENSRNOG00000027125	Mboat1	membrane bound O-acyltransferase domain containing 1			2
ENSRNOG00000027432	R3hdml	R3H domain (binds single-stranded nucleic acids) containing-like			2
ENSRNOG00000027475	Brip1	BRCA1 interacting protein C-terminal helicase 1	nucleobase, nucleoside, nucleotide and nucleic acid metabolic process; regulation of transcription from RNA polymerase II promoter		2
ENSRNOG00000027491	Vldlr	very low density lipoprotein receptor	cell surface receptor linked signal transduction; cellular response to insulin stimulus; cholesterol metabolic process; endocytosis; lipid metabolic process; lipid transport; positive regulation of protein kinase activity; response to hormone stimulus; response to hypoxia; response to lipopolysaccharide; response to nutrient; steroid metabolic process		2
ENSRNOG00000027655	Clec4b2	C-type lectin domain family 4, member b2			2
ENSRNOG00000027787	Cdc6	cell division cycle 6 homolog (S. cerevisiae)		rno04110:Cell cycle	2
ENSRNOG00000027894	Iqgap3	IQ motif containing GTPase activating protein 3	regulation of small GTPase mediated signal transduction; signal transduction; small GTPase mediated signal transduction	rno04810:Regulation of actin cytoskeleton	2
ENSRNOG00000028415	Cdc20	cell division cycle 20 homolog (S. cerevisiae)	cell cycle; cell division; mitosis; modification-dependent protein catabolic process	rno04110:Cell cycle; rno04114:Oocyte meiosis; rno04120:Ubiquitin mediated proteolysis	2
ENSRNOG00000028549	Capza2	capping protein (actin filament) muscle Z-line, alpha 2	actin cytoskeleton organization; actin filament capping		2
ENSRNOG00000028636	Xkr5	XK, Kell blood group complex subunit-related family, member 5			2
ENSRNOG00000028640	Siva1	SIVA1, apoptosis-inducing factor	induction of apoptosis; positive regulation of apoptosis		2
ENSRNOG00000028975	Hist2h3c2	histone cluster 1, H3f; "histone cluster 2, H3c"; "histone cluster 2, H3c2"; "histone cluster 2, H3c2-like"; "similar to H3 histone, family 2 isoform 2"; similar to CG31613-PA	nucleosome assembly	rno05322:Systemic lupus erythematosus	2
ENSRNOG00000029055	Ttk	Ttk protein kinase	protein amino acid phosphorylation	rno04110:Cell cycle	2
ENSRNOG00000029373	Ard1a	ARD1 homolog A, N-acetyltransferase (S. cerevisiae)	metabolic process		2
ENSRNOG00000029668	LOC360228	WDNM1 homolog	response to lipopolysaccharide; response to tumor necrosis factor; white fat cell differentiation		2
ENSRNOG00000029682	Clic1	chloride intracellular channel 1	chloride transport; ion transport		2
ENSRNOG00000029912	2005-09-01	glycoprotein Ib (platelet), beta polypeptide; septin 5	blood coagulation; cell adhesion; cell cycle; cell division; positive regulation of exocytosis	rno04512:ECM-receptor interaction; rno04640:Hematopoietic cell lineage; rno05012:Parkinson's disease	2
ENSRNOG00000030101	Traip	TRAF-interacting protein	signal transduction		2
ENSRNOG00000030118	Msn	moesin	leukocyte adhesion; leukocyte migration; membrane to membrane docking	rno04670:Leukocyte transendothelial migration; rno04810:Regulation of actin cytoskeleton	2
ENSRNOG00000030317	Kif1b	6-phosphogluconate dehydrogenase, decarboxylating-like; kinesin family member 1B	carbohydrate metabolic process; metabolic process; microtubule-based movement; nerve-nerve synaptic transmission; neuromuscular synaptic transmission; oxidation reduction; pentose-phosphate shunt; transcription initiation		2
ENSRNOG00000031040	Troap	trophinin associated protein			2
ENSRNOG00000031312	Tnfrsf1a	tumor necrosis factor receptor superfamily, member 1a	apoptosis; cytokine-mediated signaling pathway; defense response to bacterium; positive regulation of I-kappaB kinase/NF-kappaB cascade; positive regulation of angiogenesis; positive regulation of inflammatory response; positive regulation of transcription from RNA polymerase II promoter; prostaglandin metabolic process; protein heterooligomerization; response to ethanol; response to lipopolysacc…	rno04010:MAPK signaling pathway; rno04060:Cytokine-cytokine receptor interaction; rno04210:Apoptosis; rno04920:Adipocytokine signaling pathway; rno05010:Alzheimer's disease; rno05014:Amyotrophic lateral sclerosis (ALS)	2
ENSRNOG00000031420	Hyal2	hyaluronoglucosaminidase 2	carbohydrate metabolic process; metabolic process	rno00531:Glycosaminoglycan degradation	2
ENSRNOG00000031479	Hdlbp	high density lipoprotein binding protein	cholesterol metabolic process; lipid metabolic process; lipid transport; steroid metabolic process		2
ENSRNOG00000031710	Spink2	serine peptidase inhibitor, Kazal type 2 (acrosin-trypsin inhibitor)			2
ENSRNOG00000031789	Q66H32_RAT	RAN GTPase activating protein 1	signal transduction		2
ENSRNOG00000031880	Lsm6	LSM6 homolog, U6 small nuclear RNA associated (S. cerevisiae); Sm protein F-like		rno03018:RNA degradation; rno03040:Spliceosome	2
ENSRNOG00000031993	Prim1	DNA primase, p49 subunit	DNA replication	rno00230:Purine metabolism; rno00240:Pyrimidine metabolism; rno03030:DNA replication	2
ENSRNOG00000032297	Sc4mol	sterol-C4-methyl oxidase-like	fatty acid biosynthetic process; oxidation reduction	rno00100:Steroid biosynthesis	2
ENSRNOG00000032516	LOC681162	CDC28 protein kinase 1B-like; CDC28 protein kinase regulatory subunit 1B; similar to Cyclin-dependent kinases regulatory subunit 1 (CKS-1) (Sid 1334)	cell cycle	rno05200:Pathways in cancer; rno05222:Small cell lung cancer	2
ENSRNOG00000032740	LOC686092	similar to UPF0197 protein C11orf10 homolog			2
ENSRNOG00000032778	Bub1	budding uninhibited by benzimidazoles 1 homolog (S. cerevisiae)	protein amino acid phosphorylation	rno04110:Cell cycle; rno04114:Oocyte meiosis; rno04914:Progesterone-mediated oocyte maturation	2
ENSRNOG00000032929	Incenp	inner centromere protein	chromosome segregation; cytokinesis		2
ENSRNOG00000033321	HMGB2_RAT	high mobility group box 2; similar to High mobility group protein 2 (HMG-2)	nervous system development; regulation of transcription from RNA polymerase II promoter		2
ENSRNOG00000033498	Cib1	calcium and integrin binding 1 (calmyrin)	apoptosis; response to DNA damage stimulus		2
ENSRNOG00000033658	Kntc1	kinetochore associated 1	mitotic cell cycle checkpoint		2
ENSRNOG00000033772	Serpinb9	serpin peptidase inhibitor, clade B (ovalbumin), member 9	anti-apoptosis		2
ENSRNOG00000034140	Htra4	HtrA serine peptidase 4	proteolysis; regulation of cell growth		2
ENSRNOG00000034168	Gemin7	gem (nuclear organelle) associated protein 7; gem (nuclear organelle) associated protein 7-like 1; rCG54304-like			2
ENSRNOG00000034254	Actb	actin, beta	response to calcium ion; sarcomere organization	rno04510:Focal adhesion; rno04520:Adherens junction; rno04530:Tight junction; rno04670:Leukocyte transendothelial migration; rno04810:Regulation of actin cytoskeleton; rno05410:Hypertrophic cardiomyopathy (HCM); rno05412:Arrhythmogenic right ventricular cardiomyopathy (ARVC); rno05414:Dilated cardiomyopathy; rno05416:Viral myocarditis	2
ENSRNOG00000036627	Ms4a6a	membrane-spanning 4-domains, subfamily A, member 6A	signal transduction		2
ENSRNOG00000036663	Foxk2	forkhead box K2			2
ENSRNOG00000036676	Csnk1d	casein kinase 1, delta	Wnt receptor signaling pathway; mitotic cell cycle; protein amino acid phosphorylation	rno04340:Hedgehog signaling pathway; rno04540:Gap junction; rno04710:Circadian rhythm	2
ENSRNOG00000036677	Slc16a3	solute carrier family 16, member 3 (monocarboxylic acid transporter 4)	organic anion transport; transmembrane transport		2
ENSRNOG00000036700	Fscn2	fascin homolog 2, actin-bundling protein, retinal (Strongylocentrotus purpuratus)	eye photoreceptor cell development		2
ENSRNOG00000036701	Actg1	actin, gamma 1 propeptide-like; "actin, gamma 1"; "similar to Actin, cytoplasmic 2 (Gamma-actin)"	response to calcium ion; sarcomere organization	rno04510:Focal adhesion; rno04520:Adherens junction; rno04530:Tight junction; rno04670:Leukocyte transendothelial migration; rno04810:Regulation of actin cytoskeleton; rno05410:Hypertrophic cardiomyopathy (HCM); rno05412:Arrhythmogenic right ventricular cardiomyopathy (ARVC); rno05414:Dilated cardiomyopathy; rno05416:Viral myocarditis	2
ENSRNOG00000036841	Cbx5	chromobox homolog 5 (HP1 alpha homolog, Drosophila)	negative regulation of transcription, DNA-dependent; chromatin assembly or disassembly		2
ENSRNOG00000036924	PTHR_RAT	parathyroid hormone-like hormone	activation of adenylate cyclase activity by G-protein signaling pathway; endochondral ossification; endoderm development; epithelial cell differentiation; lactation; lung alveolus development; negative regulation of chondrocyte differentiation; negative regulation of transcription factor activity; osteoblast development; positive regulation of cell proliferation; protein processing; skeletal syst…		2
ENSRNOG00000037247	Rras	Harvey rat sarcoma virus oncogene, subgroup R	intracellular protein transport; negative regulation of cell migration; nucleocytoplasmic transport; protein transport; signal transduction; small GTPase mediated signal transduction	rno04010:MAPK signaling pathway; rno04530:Tight junction; rno04810:Regulation of actin cytoskeleton	2
ENSRNOG00000037254	G6pd	glucose-6-phosphate dehydrogenase	carbohydrate metabolic process; glucose 6-phosphate metabolic process; glucose metabolic process; oxidation reduction; regulation of anti-apoptosis; response to ethanol; response to food; response to organic cyclic substance	rno00030:Pentose phosphate pathway; rno00480:Glutathione metabolism	2
ENSRNOG00000037283	Ssr4	signal sequence receptor, delta			2
ENSRNOG00000037302	Rad51	RAD51 homolog (RecA homolog, E. coli) (S. cerevisiae)	DNA metabolic process; DNA repair	rno03440:Homologous recombination; rno05200:Pathways in cancer; rno05212:Pancreatic cancer	2
ENSRNOG00000037430	Chfr	checkpoint with forkhead and ring finger domains	mitotic cell cycle; mitotic cell cycle checkpoint; protein polyubiquitination; ubiquitin-dependent protein catabolic process		2
ENSRNOG00000037449	Pole	polymerase (DNA directed), epsilon	nucleobase, nucleoside, nucleotide and nucleic acid metabolic process; DNA replication	rno00230:Purine metabolism; rno00240:Pyrimidine metabolism; rno03030:DNA replication; rno03410:Base excision repair; rno03420:Nucleotide excision repair	2
ENSRNOG00000037509	Chek2	CHK2 checkpoint homolog (S. pombe)	DNA damage checkpoint; protein amino acid phosphorylation; response to gamma radiation	rno04110:Cell cycle; rno04115:p53 signaling pathway	2
ENSRNOG00000038489	Sumo3	SMT3 suppressor of mif two 3 homolog 3 (S. cerevisiae)	modification-dependent protein catabolic process		2
ENSRNOG00000038572	RGD1562646	similar to chromosome condensation protein G			2
ENSRNOG00000038789	Cenpl	centromere protein L			2
ENSRNOG00000038835	Cd86	CD86 molecule	B cell activation; T cell proliferation; aging; response to interferon-gamma; response to lipopolysaccharide; response to yeast; toll-like receptor signaling pathway	rno04514:Cell adhesion molecules (CAMs); rno04620:Toll-like receptor signaling pathway; rno04672:Intestinal immune network for IgA production; rno04940:Type I diabetes mellitus; rno05320:Autoimmune thyroid disease; rno05322:Systemic lupus erythematosus; rno05330:Allograft rejection; rno05332:Graft-versus-host disease; rno05416:Viral myocarditis	2
ENSRNOG00000039284	Haus4	HAUS augmin-like complex, subunit 4	centrosome organization; spindle assembly		2
ENSRNOG00000039576	Suv39h1	suppressor of variegation 3-9 homolog 1 (Drosophila)	chromatin assembly or disassembly; chromatin modification	rno00310:Lysine degradation	2
ENSRNOG00000039698	Prss22	protease, serine, 22	proteolysis		2
ENSRNOG00000039848	Taf9	TAF9 RNA polymerase II, TATA box binding protein (TBP)-associated factor	histone H3 acetylation; negative regulation of apoptosis; positive regulation of cell growth; positive regulation of gene-specific transcription from RNA polymerase II promoter; regulation of transcription; response to interleukin-1; transcription initiation	rno03022:Basal transcription factors	2
ENSRNOG00000039859	DNMT1_RAT	DNA (cytosine-5-)-methyltransferase 1	negative regulation of transcription, DNA-dependent; DNA methylation; S-adenosylhomocysteine metabolic process; S-adenosylmethionine metabolic process; chromatin modification; positive regulation of gene expression; regulation of cell proliferation; regulation of gene expression; regulation of transcription	rno00270:Cysteine and methionine metabolism	2
ENSRNOG00000039971	Ctla2a	cytotoxic T lymphocyte-associated protein 2 alpha			2
ENSRNOG00000042094	Prr13	proline rich 13			2
ENSRNOG00000042137	RGD1562552	similar to hypothetical protein LOC340061			2
ENSRNOG00000042139	Clec4a1	C-type lectin domain family 4, member a1			2
ENSRNOG00000042359	Pigk	phosphatidylinositol glycan anchor biosynthesis, class K	proteolysis		2
ENSRNOG00000042499	Tmsb10	thymosin, beta 10; "thymosin, beta 10-like"	actin cytoskeleton organization; cytoskeleton organization; sequestering of actin monomers; spermatid development		2
ENSRNOG00000042603	Ttc39b	tetratricopeptide repeat domain 39B			2
ENSRNOG00000042682	Grpel2	GrpE-like 2, mitochondrial	protein folding		2
ENSRNOG00000042771	Apol3	apolipoprotein L, 3	lipid transport; lipoprotein metabolic process		2
ENSRNOG00000043069	Sec22a	SEC22 vesicle trafficking protein homolog A (S. cerevisiae)	ER to Golgi vesicle-mediated transport; protein transport; vesicle-mediated transport		2
ENSRNOG00000043377	Fdps	farnesyl diphosphate synthase (farnesyl pyrophosphate synthetase, dimethylallyltranstransferase, geranyltranstransferase)	cholesterol biosynthetic process; isoprenoid biosynthetic process		2
ENSRNOG00000043451	Spp1	osteopontin-like; secreted phosphoprotein 1	biomineral formation; cell adhesion; inflammatory response; ossification; osteoblast differentiation; positive regulation of bone resorption; positive regulation of cell-substrate adhesion; response to organic substance; response to steroid hormone stimulus; response to vitamin D		2
ENSRNOG00000000186	Tst	thiosulfate sulfurtransferase	iron-sulfur cluster assembly; sulfate transport		3
ENSRNOG00000000216	Klf11	Kruppel-like factor 11	negative regulation of transcription, DNA-dependent		3
ENSRNOG00000000244	Coil	coilin			3
ENSRNOG00000000249	RGD1306284	similar to RIKEN cDNA 1110005A03			3
ENSRNOG00000000302	Sesn1	sestrin 1	cell cycle arrest	rno04115:p53 signaling pathway	3
ENSRNOG00000000386	Pbld	phenazine biosynthesis-like domain-containing protein-like; phenazine biosynthesis-like protein domain containing	biosynthetic process		3
ENSRNOG00000000467	Ring1	ring finger protein 1	anterior/posterior pattern formation; camera-type eye morphogenesis; chromatin modification; modification-dependent protein catabolic process; regulation of transcription		3
ENSRNOG00000000470	Vps52	vacuolar protein sorting 52 homolog (S. cerevisiae)	protein transport		3
ENSRNOG00000000480	Phf1	PHD finger protein 1			3
ENSRNOG00000000551	RGD1305587	similar to RIKEN cDNA 2010107G23			3
ENSRNOG00000000555	Eif4ebp2	eukaryotic translation initiation factor 4E binding protein 2	cAMP-mediated signaling; insulin receptor signaling pathway; negative regulation of translational initiation		3
ENSRNOG00000000653	Nr5a2	nuclear receptor subfamily 5, group A, member 2	bile acid metabolic process; cholesterol homeostasis; positive regulation of transcription; positive regulation of transcription from RNA polymerase II promoter; regulation of cell proliferation	rno04950:Maturity onset diabetes of the young	3
ENSRNOG00000000661	Hps4	Hermansky-Pudlak syndrome 4 homolog (human)	blood coagulation; melanocyte differentiation; organelle organization		3
ENSRNOG00000000662	Srrd	SRR1 domain containing			3
ENSRNOG00000000777	RT1-S3	RT1 class Ib, locus S3	antigen processing and presentation; immune response	rno04144:Endocytosis; rno04514:Cell adhesion molecules (CAMs); rno04612:Antigen processing and presentation; rno04940:Type I diabetes mellitus; rno05320:Autoimmune thyroid disease; rno05330:Allograft rejection; rno05332:Graft-versus-host disease; rno05416:Viral myocarditis	3
ENSRNOG00000000780	Ppp1r11	protein phosphatase 1, regulatory (inhibitor) subunit 11			3
ENSRNOG00000000785	Trim39	tripartite motif-containing 39	apoptosis; two-component signal transduction system (phosphorelay)		3
ENSRNOG00000000845	Bat5	HLA-B associated transcript 5			3
ENSRNOG00000001139	Suds3	suppressor of defective silencing 3 homolog (S. cerevisiae)	negative regulation of transcription		3
ENSRNOG00000001151	Sirt4	sirtuin (silent mating type information regulation 2 homolog) 4 (S. cerevisiae)	chromatin silencing; negative regulation of insulin secretion; protein amino acid deacetylation; regulation of transcription		3
ENSRNOG00000001203	Q5M9F3_RAT	ribosomal RNA processing 1 homolog (S. cerevisiae)	rRNA processing		3
ENSRNOG00000001211	RGD1303003	homolog of zebrafish ES1			3
ENSRNOG00000001275	Tmem184a	transmembrane protein 184A			3
ENSRNOG00000001294	Ift81	intraflagellar transport 81 homolog (Chlamydomonas)	cell differentiation; multicellular organismal development; spermatogenesis		3
ENSRNOG00000001313	Gnaz	guanine nucleotide binding protein (G protein), alpha z polypeptide	inhibition of adenylate cyclase activity by G-protein signaling pathway; signal transduction	rno04730:Long-term depression	3
ENSRNOG00000001345	Mapkapk5	mitogen-activated protein kinase-activated protein kinase 5	protein amino acid phosphorylation	rno04010:MAPK signaling pathway	3
ENSRNOG00000001352	RGD1309762	similar to KIAA0614 protein	protein modification process		3
ENSRNOG00000001376	Mettl7a	methyltransferase like 7A; methyltransferase like 7A-like	metabolic process		3
ENSRNOG00000001817	Tm7sf3	transmembrane 7 superfamily member 3			3
ENSRNOG00000001878	Klhl22	kelch-like 22 (Drosophila)			3
ENSRNOG00000001989	Alcam	activated leukocyte cell adhesion molecule	cell adhesion; motor axon guidance	rno04514:Cell adhesion molecules (CAMs)	3
ENSRNOG00000002044	Gtpbp8	GTP-binding protein 8 (putative)			3
ENSRNOG00000002125	Ccni	cyclin I			3
ENSRNOG00000002142	Cds1	CDP-diacylglycerol synthase 1	phospholipid biosynthetic process	rno00564:Glycerophospholipid metabolism; rno04070:Phosphatidylinositol signaling system	3
ENSRNOG00000002210	Hsd17b11	hydroxysteroid (17-beta) dehydrogenase 11	metabolic process; oxidation reduction; steroid biosynthetic process		3
ENSRNOG00000002212	DHB13_RAT	hydroxysteroid (17-beta) dehydrogenase 13	metabolic process; oxidation reduction		3
ENSRNOG00000002322	RGD1310587	similar to hypothetical protein FLJ14146			3
ENSRNOG00000002358	Scpep1	serine carboxypeptidase 1	proteolysis; retinoic acid metabolic process		3
ENSRNOG00000002516	Mtm1	myotubularin 1	dephosphorylation; muscle homeostasis		3
ENSRNOG00000002682	B2GUW5_RAT	zinc finger protein 692			3
ENSRNOG00000002722	Sec14l1	SEC14-like 1 (S. cerevisiae)			3
ENSRNOG00000002781	Kdsr	3-ketodihydrosphingosine reductase	metabolic process; sphingolipid biosynthetic process	rno00600:Sphingolipid metabolism	3
ENSRNOG00000002793	Sstr2	somatostatin receptor 2	inhibition of adenylate cyclase activity by G-protein signaling pathway; neuropeptide signaling pathway; peristalsis; regulation of muscle contraction; signal transduction	rno04080:Neuroactive ligand-receptor interaction	3
ENSRNOG00000002800	Gdpd2	glycerophosphodiester phosphodiesterase domain containing 2	glycerol metabolic process; lipid metabolic process		3
ENSRNOG00000002852	RGD1559961	myosin XIX			3
ENSRNOG00000002896	Prdx6	peroxiredoxin 6	cell redox homeostasis; hydrogen peroxide catabolic process; lipid catabolic process; oxidation reduction; phospholipid catabolic process; response to oxidative stress	rno00360:Phenylalanine metabolism; rno00680:Methane metabolism	3
ENSRNOG00000002906	Nr1i2	nuclear receptor subfamily 1, group I, member 2	negative regulation of transcription; positive regulation of transcription; xenobiotic metabolic process		3
ENSRNOG00000002922	Adora2b	adenosine A2B receptor	activation of adenylate cyclase activity by G-protein signaling pathway; cellular response to extracellular stimulus; positive regulation of cAMP biosynthetic process; positive regulation of cGMP biosynthetic process; positive regulation of chemokine production; positive regulation of interleukin-6 production; positive regulation of mast cell degranulation; positive regulation vascular endothelia…	rno04020:Calcium signaling pathway; rno04080:Neuroactive ligand-receptor interaction; rno04270:Vascular smooth muscle contraction	3
ENSRNOG00000002948	Abcc3	ATP-binding cassette, subfamily C (CFTR/MRP), member 3	response to estradiol stimulus; response to lipopolysaccharide; response to organic cyclic substance; response to organic nitrogen; transmembrane transport; transport	rno02010:ABC transporters	3
ENSRNOG00000002978	Faslg	Fas ligand (TNF superfamily, member 6)	immune response; induction of apoptosis via death domain receptors; positive regulation of I-kappaB kinase/NF-kappaB cascade; positive regulation of apoptosis; response to lipopolysaccharide; signal transduction	rno04010:MAPK signaling pathway; rno04060:Cytokine-cytokine receptor interaction; rno04210:Apoptosis; rno04650:Natural killer cell mediated cytotoxicity; rno04722:Neurotrophin signaling pathway; rno04940:Type I diabetes mellitus; rno05200:Pathways in cancer; rno05320:Autoimmune thyroid disease; rno05330:Allograft rejection; rno05332:Graft-versus-host disease	3
ENSRNOG00000003063	KPB1_RAT	phosphorylase kinase, alpha 1	glycogen metabolic process; phosphatidylcholine biosynthetic process; protein amino acid autophosphorylation	rno04020:Calcium signaling pathway; rno04910:Insulin signaling pathway	3
ENSRNOG00000003143	RGD1310166	similar to Chromodomain-helicase-DNA-binding protein 1 (CHD-1)			3
ENSRNOG00000003285	Mpv17l	Mpv17 transgene, kidney disease mutant-like (predicted)-like			3
ENSRNOG00000003392	Grsf1	G-rich RNA sequence binding factor 1	anterior/posterior pattern formation; morphogenesis of embryonic epithelium		3
ENSRNOG00000003439	Il15	interleukin 15	aging; angiogenesis; inflammatory response; lymph node development; negative regulation of smooth muscle cell proliferation; positive regulation of T cell proliferation; positive regulation of immune response	rno04060:Cytokine-cytokine receptor interaction; rno04630:Jak-STAT signaling pathway; rno04672:Intestinal immune network for IgA production	3
ENSRNOG00000003491	Prkca	protein kinase C, alpha	aging; cellular calcium ion homeostasis; chondrocyte differentiation; establishment of protein localization; inactivation of MAPK activity; induction of apoptosis by intracellular signals; induction of positive chemotaxis; intracellular signaling cascade; learning or memory; negative regulation of cell proliferation; negative regulation of glucose import; negative regulation of heart contraction;…		3
ENSRNOG00000003515	Ephx1	epoxide hydrolase 1, microsomal	response to toxin; xenobiotic metabolic process	rno00980:Metabolism of xenobiotics by cytochrome P450	3
ENSRNOG00000003767	Rps6kc1	ribosomal protein S6 kinase, polypeptide 1	cell communication; protein amino acid phosphorylation		3
ENSRNOG00000003773	Hmox2	heme oxygenase (decycling) 2	oxidation reduction; response to hypoxia; response to oxidative stress	rno00860:Porphyrin and chlorophyll metabolism	3
ENSRNOG00000003777	Chrne	cholinergic receptor, nicotinic, epsilon	ion transport; regulation of membrane potential; transport		3
ENSRNOG00000003795	Angel2	angel homolog 2 (Drosophila)			3
ENSRNOG00000003861	Scyl1bp1	golgin, RAB6-interacting			3
ENSRNOG00000003875	Ocrl	oculocerebrorenal syndrome of Lowe	signal transduction	rno00562:Inositol phosphate metabolism; rno04070:Phosphatidylinositol signaling system	3
ENSRNOG00000003982	PTN21_RAT	protein tyrosine phosphatase, non-receptor type 21	cytoskeleton organization; dephosphorylation; protein amino acid dephosphorylation		3
ENSRNOG00000004026	Atp2b1	ATPase, Ca++ transporting, plasma membrane 1	ATP biosynthetic process; calcium ion transport; cation transport; metabolic process	rno04020:Calcium signaling pathway	3
ENSRNOG00000004027	Aldh9a1	aldehyde dehydrogenase 9 family, member A1	cellular aldehyde metabolic process; kidney development; liver development; metabolic process; oxidation reduction	rno00010:Glycolysis / Gluconeogenesis; rno00053:Ascorbate and aldarate metabolism; rno00071:Fatty acid metabolism; rno00280:Valine, leucine and isoleucine degradation; rno00310:Lysine degradation; rno00330:Arginine and proline metabolism; rno00340:Histidine metabolism; rno00380:Tryptophan metabolism; rno00410:beta-Alanine metabolism; rno00561:Glycerolipid metabolism; rno00620:Pyruvate metabolism;…	3
ENSRNOG00000004104	B5DFE1_RAT	zinc finger protein 167			3
ENSRNOG00000004131	Pkn1	protein kinase N1	hyperosmotic response; protein amino acid phosphorylation; signal transduction		3
ENSRNOG00000004145	Ncrna00117	non-protein coding RNA 117			3
ENSRNOG00000004152	Lrp12	low density lipoprotein-related protein 12			3
ENSRNOG00000004172	Pdk2	pyruvate dehydrogenase kinase, isozyme 2	carbohydrate metabolic process; glucose metabolic process; peptidyl-histidine phosphorylation; signal transduction		3
ENSRNOG00000004177	Myo1a	myosin IA	cell projection organization; sensory perception of sound		3
ENSRNOG00000004222	S100g	S100 calcium binding protein G			3
ENSRNOG00000004281	Cobl	cordon-bleu homolog (mouse)	neural tube closure		3
ENSRNOG00000004283	Camta2	calmodulin binding transcription activator 2	positive regulation of transcription from RNA polymerase II promoter; regulation of transcription		3
ENSRNOG00000004360	Sip1	survival of motor neuron protein interacting protein 1	RNA splicing; spliceosome assembly		3
ENSRNOG00000004572	Zfp472	zinc finger protein 472	regulation of transcription; transcription		3
ENSRNOG00000004686	Spop	speckle-type POZ protein			3
ENSRNOG00000004940	Rnf215	ring finger protein 215			3
ENSRNOG00000004994	Agr3	anterior gradient homolog 3 (Xenopus laevis)			3
ENSRNOG00000005059	Med22	mediator complex subunit 22	regulation of transcription; regulation of transcription from RNA polymerase II promoter		3
ENSRNOG00000005107	Recql5	RecQ protein-like 5	DNA recombination		3
ENSRNOG00000005297	Adcy9	adenylate cyclase 9	cAMP biosynthetic process; cyclic nucleotide biosynthetic process; intracellular signaling cascade	rno00230:Purine metabolism; rno04020:Calcium signaling pathway; rno04062:Chemokine signaling pathway; rno04114:Oocyte meiosis; rno04270:Vascular smooth muscle contraction; rno04540:Gap junction; rno04912:GnRH signaling pathway; rno04914:Progesterone-mediated oocyte maturation; rno04916:Melanogenesis; rno05414:Dilated cardiomyopathy	3
ENSRNOG00000005357	RGD1563106	similar to novel protein			3
ENSRNOG00000005446	Gna11	guanine nucleotide binding protein, alpha 11	heart development; pigmentation during development; protein amino acid ADP-ribosylation; regulation of action potential; signal transduction; skeletal system development	rno04020:Calcium signaling pathway; rno04270:Vascular smooth muscle contraction; rno04540:Gap junction; rno04730:Long-term depression; rno04912:GnRH signaling pathway	3
ENSRNOG00000005609	Neurod1	neurogenic differentiation 1	anterior/posterior pattern formation; camera-type eye development; cell fate commitment; cerebellum development; embryonic organ morphogenesis; endocrine pancreas development; glucose homeostasis; hindbrain development; multicellular organismal development; negative regulation of apoptosis; nervous system development; nitric oxide mediated signal transduction; positive regulation of neuron differ…	rno04950:Maturity onset diabetes of the young	3
ENSRNOG00000005618	Fmc1	formation of mitochondrial complexes 1 homolog (S. cerevisiae)			3
ENSRNOG00000005698	Ndufa5	NADH dehydrogenase (ubiquinone) 1 alpha subcomplex 5	respiratory electron transport chain; transport	rno00190:Oxidative phosphorylation; rno05010:Alzheimer's disease; rno05012:Parkinson's disease; rno05016:Huntington's disease	3
ENSRNOG00000005711	Q62604_RAT	protein tyrosine phosphatase, receptor type, D	dephosphorylation; protein amino acid dephosphorylation		3
ENSRNOG00000005853	Tacr1	tachykinin receptor 1	positive regulation of synaptic transmission, GABAergic; "positive regulation of synaptic transmission, cholinergic"; acute inflammatory response; associative learning; behavioral response to pain; eating behavior; elevation of cytosolic calcium ion concentration; long-term memory; neuropeptide signaling pathway; positive regulation of blood pressure; positive regulation of epithelial cell migrat…	rno04020:Calcium signaling pathway; rno04080:Neuroactive ligand-receptor interaction	3
ENSRNOG00000005874	Tle2	transducin-like enhancer of split 2 (E(sp1) homolog, Drosophila)	protein amino acid phosphorylation; regulation of transcription		3
ENSRNOG00000006102	Pole4	polymerase (DNA-directed), epsilon 4 (p12 subunit)		rno00230:Purine metabolism; rno00240:Pyrimidine metabolism; rno03030:DNA replication; rno03410:Base excision repair; rno03420:Nucleotide excision repair	3
ENSRNOG00000006393	Sirt6	sirtuin (silent mating type information regulation 2 homolog) 6 (S. cerevisiae)	chromatin silencing; protein amino acid ADP-ribosylation; protein amino acid deacetylation; regulation of transcription		3
ENSRNOG00000006450	Erbb2	v-erb-b2 erythroblastic leukemia viral oncogene homolog 2, neuro/glioblastoma derived oncogene homolog (avian)	central nervous system development; glial cell differentiation; heart development; liver development; mammary gland involution; motor axon guidance; myelination; negative regulation of apoptosis; neuromuscular junction development; peptidyl-tyrosine phosphorylation; peripheral nervous system development; positive regulation of MAP kinase activity; positive regulation of MAPKKK cascade; positive r…	rno04012:ErbB signaling pathway; rno04020:Calcium signaling pathway; rno04510:Focal adhesion; rno04520:Adherens junction; rno05200:Pathways in cancer; rno05212:Pancreatic cancer; rno05213:Endometrial cancer; rno05215:Prostate cancer; rno05219:Bladder cancer; rno05223:Non-small cell lung cancer	3
ENSRNOG00000006534	Crbn	cereblon	proteolysis		3
ENSRNOG00000006544	Hoxa9	homeobox A9	anterior/posterior pattern formation; embryonic skeletal system morphogenesis; multicellular organismal development; negative regulation of transcription from RNA polymerase II promoter; positive regulation of transcription from RNA polymerase II promoter		3
ENSRNOG00000006593	Grpel1	GrpE-like 1, mitochondrial	protein folding		3
ENSRNOG00000006824	Hdac11	histone deacetylase 11	histone deacetylation		3
ENSRNOG00000006878	Slc26a3	solute carrier family 26, member 3	anion transport; sulfate transport; transmembrane transport; transport		3
ENSRNOG00000006901	Cd320	CD320 antigen-like; CD320 molecule			3
ENSRNOG00000006904	Mfn2	mitofusin 2	camera-type eye morphogenesis; mitochondrial membrane organization; negative regulation of Ras protein signal transduction; negative regulation of cell proliferation; negative regulation of smooth muscle cell proliferation; protein targeting to mitochondrion		3
ENSRNOG00000006913	Rpain	RPA interacting protein			3
ENSRNOG00000006934	Acvr1b	activin A receptor, type IB	G1/S transition of mitotic cell cycle; embryonic development; hair follicle development; in utero embryonic development; induction of apoptosis; negative regulation of cell growth; peptidyl-threonine phosphorylation; positive regulation of erythrocyte differentiation; protein amino acid autophosphorylation; protein amino acid phosphorylation; regulation of transcription; signal transduction	rno04010:MAPK signaling pathway; rno04060:Cytokine-cytokine receptor interaction; rno04144:Endocytosis; rno04350:TGF-beta signaling pathway; rno04520:Adherens junction; rno05200:Pathways in cancer; rno05210:Colorectal cancer; rno05212:Pancreatic cancer; rno05220:Chronic myeloid leukemia	3
ENSRNOG00000006986	RGD1304624	similar to RIKEN cDNA 2700097O09			3
ENSRNOG00000006990	Grb7	growth factor receptor bound protein 7	signal transduction		3
ENSRNOG00000007084	Rnf190	ring finger protein 190	modification-dependent protein catabolic process		3
ENSRNOG00000007172	Map4k3	mitogen-activated protein kinase kinase kinase kinase 3	protein amino acid phosphorylation; protein kinase cascade; response to stress	rno04010:MAPK signaling pathway	3
ENSRNOG00000007175	Mier1	mesoderm induction early response 1 homolog (Xenopus laevis)			3
ENSRNOG00000007255	Zpbp2	zona pellucida binding protein 2	binding of sperm to zona pellucida		3
ENSRNOG00000007290	Atp1a2	ATPase, Na+/K+ transporting, alpha 2 polypeptide	ATP biosynthetic process; ATP catabolic process; ATP hydrolysis coupled proton transport; adult locomotory behavior; cation transport; locomotion; metabolic process; monovalent inorganic cation transport; negative regulation of heart contraction; potassium ion transport; reduction of cytosolic calcium ion concentration; regulation of blood pressure; regulation of respiratory gaseous exchange by n…	rno04260:Cardiac muscle contraction; rno04960:Aldosterone-regulated sodium reabsorption	3
ENSRNOG00000007323	Ric8b	resistance to inhibitors of cholinesterase 8 homolog B (C. elegans)			3
ENSRNOG00000007459	Pcnx	pecanex homolog (Drosophila)			3
ENSRNOG00000007606	Rnf43	ring finger protein 43			3
ENSRNOG00000007637	Acer2	alkaline ceramidase 2		rno00600:Sphingolipid metabolism	3
ENSRNOG00000007784	Bloc1s1	biogenesis of lysosomal organelles complex-1, subunit 1			3
ENSRNOG00000007881	Mtmr14	myotubularin related protein 14	dephosphorylation		3
ENSRNOG00000007909	Cd69	Cd69 molecule	complement activation, lectin pathway		3
ENSRNOG00000008020	Pax4	paired box 4	circadian rhythm; multicellular organismal development; negative regulation of transcription; negative regulation of transcription from RNA polymerase II promoter; positive regulation of anti-apoptosis; positive regulation of cell differentiation; regulation of transcription; response to cAMP; response to drug; retina development in camera-type eye	rno04950:Maturity onset diabetes of the young	3
ENSRNOG00000008088	Btbd3	BTB (POZ) domain containing 3			3
ENSRNOG00000008116	Ppap2b	phosphatidic acid phosphatase type 2B	blood vessel development; gastrulation with mouth forming second; phospholipid metabolic process; regulation of Wnt receptor signaling pathway	rno00561:Glycerolipid metabolism; rno00564:Glycerophospholipid metabolism; rno00565:Ether lipid metabolism; rno00600:Sphingolipid metabolism; rno04666:Fc gamma R-mediated phagocytosis	3
ENSRNOG00000008194	RGD1306344	zinc finger, NFX1-type containing 1			3
ENSRNOG00000008209	St3gal1	ST3 beta-galactoside alpha-2,3-sialyltransferase 1	protein amino acid glycosylation	rno00512:O-Glycan biosynthesis; rno00533:Keratan sulfate biosynthesis; rno00603:Glycosphingolipid biosynthesis; rno00604:Glycosphingolipid biosynthesis	3
ENSRNOG00000008236	Decr1	2,4-dienoyl CoA reductase 1, mitochondrial	fatty acid beta-oxidation; metabolic process; oxidation reduction; protein homotetramerization		3
ENSRNOG00000008284	Cftr	cystic fibrosis transmembrane conductance regulator homolog (human)	body fluid secretion; cholesterol biosynthetic process; cholesterol transport; ion transport; lung development; response to drug; response to estrogen stimulus; response to peptide hormone stimulus; transepithelial chloride transport; transmembrane transport; transport; vasodilation	rno02010:ABC transporters	3
ENSRNOG00000008364	Cat	catalase	UV protection; aerobic respiration; cholesterol metabolic process; hemoglobin metabolic process; hydrogen peroxide catabolic process; negative regulation of NF-kappaB transcription factor activity; negative regulation of apoptosis; oxidation reduction; positive regulation of NF-kappaB transcription factor activity; positive regulation of cell division; positive regulation of phosphoinositide 3-ki…	rno00380:Tryptophan metabolism; rno00680:Methane metabolism; rno05014:Amyotrophic lateral sclerosis (ALS)	3
ENSRNOG00000008399	Wdr21	DDB1 and CUL4 associated factor 4	neuropeptide signaling pathway		3
ENSRNOG00000008507	Cradd	CASP2 and RIPK1 domain containing adaptor with death domain	induction of apoptosis; regulation of apoptosis		3
ENSRNOG00000008572	Ppcs	phosphopantothenoylcysteine synthetase		rno00770:Pantothenate and CoA biosynthesis	3
ENSRNOG00000008574	Vdr	vitamin D (1,25- dihydroxyvitamin D3) receptor	calcium ion transport; cellular calcium ion homeostasis; decidualization; intestinal absorption; lactation; multicellular organismal development; negative regulation of cell proliferation; negative regulation of gene-specific transcription from RNA polymerase II promoter; negative regulation of transcription; organ morphogenesis; regulation of transcription from RNA polymerase II promoter; skelet…		3
ENSRNOG00000008575	Abp1	amiloride binding protein 1 (amine oxidase, copper-containing)	amine metabolic process; oxidation reduction	rno00330:Arginine and proline metabolism; rno00340:Histidine metabolism; rno00380:Tryptophan metabolism	3
ENSRNOG00000008584	Rnaseh1	ribonuclease H1	mitochondrial DNA replication	rno03030:DNA replication	3
ENSRNOG00000008597	TAD3L_RAT	transcriptional adaptor 3 (NGG1 homolog, yeast)-like B; "transcriptional adaptor 3 (NGG1 homolog, yeast)-like"	regulation of transcription		3
ENSRNOG00000008676	Emp1	epithelial membrane protein 1	cell growth; epithelial cell differentiation		3
ENSRNOG00000008709	B5DEI5_RAT	Rho GTPase-activating protein	cell communication; signal transduction		3
ENSRNOG00000008720	Wbp1	WW domain binding protein 1			3
ENSRNOG00000008755	ACOX1_RAT	acyl-Coenzyme A oxidase 1, palmitoyl	fatty acid beta-oxidation; fatty acid metabolic process; generation of precursor metabolites and energy; lipid metabolic process; metabolic process; oxidation reduction; prostaglandin metabolic process; spermatogenesis; tRNA aminoacylation for protein translation; translation; very-long-chain fatty acid metabolic process	rno00071:Fatty acid metabolism; rno00592:alpha-Linolenic acid metabolism; rno01040:Biosynthesis of unsaturated fatty acids; rno03320:PPAR signaling pathway	3
ENSRNOG00000008810	Nelf	nasal embryonic LHRH factor			3
ENSRNOG00000008843	Dci	enoyl-Coenzyme A delta isomerase 1	fatty acid beta-oxidation; fatty acid metabolic process; lipid metabolic process; metabolic process	rno00071:Fatty acid metabolism	3
ENSRNOG00000008849	Guca2a	guanylate cyclase activator 2a (guanylin)			3
ENSRNOG00000008892	Parp2	poly (ADP-ribose) polymerase 2	base-excision repair; metabolic process; protein amino acid ADP-ribosylation; proteolysis	rno03410:Base excision repair	3
ENSRNOG00000008934	RGD1563224	similar to 4930438D12Rik protein			3
ENSRNOG00000008965	Socs2	suppressor of cytokine signaling 2	aging; cellular response to hormone stimulus; intracellular signaling cascade; modification-dependent protein catabolic process; negative regulation of signal transduction; regulation of growth; response to estradiol stimulus; response to peptide hormone stimulus	rno04630:Jak-STAT signaling pathway; rno04910:Insulin signaling pathway; rno04930:Type II diabetes mellitus	3
ENSRNOG00000008988	Cyp2d2	cytochrome P450, family 2, subfamily d, polypeptide 2	female pregnancy; oxidation reduction; response to drug	rno00982:Drug metabolism	3
ENSRNOG00000009022	Rtkn	rhotekin	Rho protein signal transduction; apoptosis; regulation of anti-apoptosis; signal transduction		3
ENSRNOG00000009030	Rab19	RAB19, member RAS oncogene family	intracellular protein transport; nucleocytoplasmic transport; protein transport; signal transduction; small GTPase mediated signal transduction		3
ENSRNOG00000009031	Gucy2c	guanylate cyclase 2C	cGMP biosynthetic process; intracellular signaling cascade; protein amino acid phosphorylation; regulation of cell proliferation; response to toxin	rno00230:Purine metabolism	3
ENSRNOG00000009084	Rpusd3	RNA pseudouridylate synthase domain containing 3	RNA modification; pseudouridine synthesis		3
ENSRNOG00000009096	Pon3	paraoxonase 3			3
ENSRNOG00000009157	Fut4	fucosyltransferase 4 (alpha (1,3) fucosyltransferase, myeloid-specific)	protein amino acid glycosylation	rno00601:Glycosphingolipid biosynthesis	3
ENSRNOG00000009243	Oaf	OAF homolog (Drosophila)			3
ENSRNOG00000009312	RGD1311188	similar to 1500031N24Rik protein	transcription		3
ENSRNOG00000009389	Ripk2	receptor-interacting serine-threonine kinase 2	T cell proliferation; T cell receptor signaling pathway; defense response to Gram-positive bacterium; lipopolysaccharide-mediated signaling pathway; positive regulation of ERK1 and ERK2 cascade; positive regulation of I-kappaB kinase/NF-kappaB cascade; positive regulation of JNK cascade; positive regulation of NF-kappaB transcription factor activity; positive regulation of alpha-beta T cell proli…	rno04621:NOD-like receptor signaling pathway; rno04722:Neurotrophin signaling pathway	3
ENSRNOG00000009390	Edn2	endothelin 2	activation of protein kinase C activity by G-protein coupled receptor protein signaling pathway; calcium-mediated signaling; cytokine-mediated signaling pathway; elevation of cytosolic calcium ion concentration; inositol phosphate-mediated signaling; macrophage activation; macrophage chemotaxis; negative regulation of hormone secretion; neutrophil chemotaxis; positive regulation of cell prolifera…		3
ENSRNOG00000009449	Trim35	tripartite motif-containing 35	apoptosis; induction of apoptosis; negative regulation of cell proliferation; negative regulation of mitotic cell cycle; protein ubiquitination		3
ENSRNOG00000009478	RGD1359108	similar to RIKEN cDNA 3110043O21			3
ENSRNOG00000009538	Etfdh	electron-transferring-flavoprotein dehydrogenase	electron transport chain; fatty acid beta-oxidation; oxidation reduction; response to oxidative stress; transport		3
ENSRNOG00000009565	Pdk4	pyruvate dehydrogenase kinase, isozyme 4	acetyl-CoA biosynthetic process from pyruvate; carbohydrate metabolic process; glucose metabolic process; peptidyl-histidine phosphorylation; signal transduction		3
ENSRNOG00000009576	Xpa	xeroderma pigmentosum, complementation group A	DNA damage response, signal transduction resulting in induction of apoptosis; nucleotide-excision repair; response to UV; response to oxidative stress; response to toxin	rno03420:Nucleotide excision repair	3
ENSRNOG00000009629	Car2	carbonic anhydrase II	kidney development; morphogenesis of an epithelium; odontogenesis of dentine-containing tooth; one-carbon metabolic process; positive regulation of bone resorption; positive regulation of osteoclast differentiation; regulation of cellular pH; response to estrogen stimulus; response to organic substance; response to pH; response to stress; response to zinc ion; secretion	rno00910:Nitrogen metabolism	3
ENSRNOG00000009652	Prkci	protein kinase C, iota	actin filament organization; cell-cell junction organization; cellular response to insulin stimulus; eye photoreceptor cell development; intracellular signaling cascade; positive regulation of glucose import; protein amino acid phosphorylation; regulation of establishment of protein localization	rno04144:Endocytosis; rno04530:Tight junction; rno04910:Insulin signaling pathway	3
ENSRNOG00000009667	Mlst8	MTOR associated protein, LST8 homolog (S. cerevisiae)	positive regulation of actin filament polymerization; positive regulation of peptidyl-tyrosine phosphorylation	rno04150:mTOR signaling pathway	3
ENSRNOG00000009841	Q4G053_RAT	sterile alpha motif domain containing 9-like			3
ENSRNOG00000009845	Acadm	acyl-Coenzyme A dehydrogenase, C-4 to C-12 straight chain	cardiac muscle cell differentiation; fatty acid beta-oxidation; fatty acid metabolic process; heart development; lipid metabolic process; liver development; metabolic process; oxidation reduction; post-embryonic development; response to cold; response to copper ion; response to drug; response to glucocorticoid stimulus; response to hormone stimulus; response to nutrient; response to starvation	rno00071:Fatty acid metabolism; rno00280:Valine, leucine and isoleucine degradation; rno00410:beta-Alanine metabolism; rno00640:Propanoate metabolism; rno03320:PPAR signaling pathway	3
ENSRNOG00000009864	Pla2g12a	phospholipase A2, group XIIA	lipid catabolic process; phospholipid metabolic process	rno00564:Glycerophospholipid metabolism; rno00565:Ether lipid metabolism; rno00590:Arachidonic acid metabolism; rno00591:Linoleic acid metabolism; rno00592:alpha-Linolenic acid metabolism; rno04010:MAPK signaling pathway; rno04270:Vascular smooth muscle contraction; rno04370:VEGF signaling pathway; rno04664:Fc epsilon RI signaling pathway; rno04730:Long-term depression; rno04912:GnRH signaling pa…	3
ENSRNOG00000009893	Uxt	ubiquitously expressed transcript	centrosome organization; microtubule cytoskeleton organization; protein folding		3
ENSRNOG00000009970	Q7TSB6_RAT	deafness, autosomal dominant 5 (human)	inner ear receptor cell differentiation		3
ENSRNOG00000009983	Lrrc42	leucine rich repeat containing 42			3
ENSRNOG00000010048	Dctn1	dynactin 1	microtubule-based process	rno05016:Huntington's disease	3
ENSRNOG00000010172	Mkrn3	makorin, ring finger protein, 3			3
ENSRNOG00000010216	RGD1308772	similar to KIAA0564 protein			3
ENSRNOG00000010337	Slc13a2	solute carrier family 13 (sodium-dependent dicarboxylate transporter), member 2	ion transport; sodium ion transport; transmembrane transport		3
ENSRNOG00000010453	Klhl7	kelch-like 7 (Drosophila)			3
ENSRNOG00000010495	Ttc17	tetratricopeptide repeat domain 17			3
ENSRNOG00000010512	Yipf1	Yip1 domain family, member 1			3
ENSRNOG00000010610	Hpgd	hydroxyprostaglandin dehydrogenase 15 (NAD)	fatty acid metabolic process; female pregnancy; lipid metabolic process; metabolic process; negative regulation of cell cycle; oxidation reduction; parturition; prostaglandin metabolic process; transforming growth factor beta receptor signaling pathway		3
ENSRNOG00000010697	Hadh	hydroxyacyl-Coenzyme A dehydrogenase	fatty acid metabolic process; lipid metabolic process; metabolic process; negative regulation of insulin secretion; oxidation reduction; response to activity; response to drug; response to hormone stimulus; response to insulin stimulus	rno00062:Fatty acid elongation in mitochondria; rno00071:Fatty acid metabolism; rno00280:Valine, leucine and isoleucine degradation; rno00310:Lysine degradation; rno00380:Tryptophan metabolism; rno00650:Butanoate metabolism	3
ENSRNOG00000010716	Atoh8	atonal homolog 8 (Drosophila)	regulation of transcription		3
ENSRNOG00000010728	Stradb	STE20-related kinase adaptor beta	JNK cascade; activation of protein kinase activity; anti-apoptosis; cell morphogenesis; protein amino acid phosphorylation; protein export from nucleus		3
ENSRNOG00000010736	Pbx4	pre-B-cell leukemia homeobox 4			3
ENSRNOG00000010743	Fdxacb1	ferredoxin-fold anticodon binding domain containing 1	tRNA processing		3
ENSRNOG00000010800	Hadhb	hydroxyacyl-Coenzyme A dehydrogenase/3-ketoacyl-Coenzyme A thiolase/enoyl-Coenzyme A hydratase (trifunctional protein), beta subunit	fatty acid beta-oxidation; fatty acid metabolic process; lipid metabolic process; metabolic process	rno00062:Fatty acid elongation in mitochondria; rno00071:Fatty acid metabolism; rno00280:Valine, leucine and isoleucine degradation	3
ENSRNOG00000010838	ARAF_RAT	v-raf murine sarcoma 3611 viral oncogene homolog	intracellular signaling cascade; protein amino acid phosphorylation; protein kinase cascade; signal transduction		3
ENSRNOG00000010861	Atad1	ATPase family, AAA domain containing 1			3
ENSRNOG00000010881	Trak2	trafficking protein, kinesin binding 2	neurotransmitter transport; protein amino acid O-linked glycosylation; protein targeting; regulation of transcription from RNA polymerase II promoter		3
ENSRNOG00000010906	Ccl5	chemokine (C-C motif) ligand 5	aging; chemotaxis; chronic inflammatory response; immune response; positive regulation of osteoclast differentiation; response to drug; response to glucocorticoid stimulus; response to insulin stimulus; response to lipopolysaccharide; response to tumor necrosis factor	rno04060:Cytokine-cytokine receptor interaction; rno04062:Chemokine signaling pathway; rno04620:Toll-like receptor signaling pathway; rno04621:NOD-like receptor signaling pathway; rno04623:Cytosolic DNA-sensing pathway; rno05020:Prion diseases	3
ENSRNOG00000010940	Acad11	acyl-Coenzyme A dehydrogenase family, member 11; nephronophthisis 3 (adolescent)	lipid metabolic process; metabolic process; oxidation reduction; photoreceptor cell maintenance; protein amino acid phosphorylation		3
ENSRNOG00000010957	Braf	v-raf murine sarcoma viral oncogene homolog B1	MAPKKK cascade; intracellular signaling cascade; protein amino acid phosphorylation; protein heterooligomerization; signal transduction	rno04010:MAPK signaling pathway; rno04012:ErbB signaling pathway; rno04062:Chemokine signaling pathway; rno04150:mTOR signaling pathway; rno04270:Vascular smooth muscle contraction; rno04510:Focal adhesion; rno04650:Natural killer cell mediated cytotoxicity; rno04720:Long-term potentiation; rno04722:Neurotrophin signaling pathway; rno04730:Long-term depression; rno04810:Regulation of actin cytosk…	3
ENSRNOG00000011022	Mep1a	meprin 1 alpha	proteolysis		3
ENSRNOG00000011135	Gtf2b	general transcription factor IIB	regulation of transcription; transcription initiation; translational initiation	rno03022:Basal transcription factors	3
ENSRNOG00000011287	Minpp1	multiple inositol polyphosphate histidine phosphatase 1; similar to hepatic multiple inositol polyphosphate phosphatase	phosphoinositide-mediated signaling	rno00562:Inositol phosphate metabolism	3
ENSRNOG00000011290	Tm2d3	TM2 domain containing 3			3
ENSRNOG00000011404	Chkb	choline kinase beta	phosphatidylethanolamine biosynthetic process	rno00564:Glycerophospholipid metabolism	3
ENSRNOG00000011573	Csad	cysteine sulfinic acid decarboxylase	carboxylic acid metabolic process	rno00430:Taurine and hypotaurine metabolism	3
ENSRNOG00000011648	Aqp1	aquaporin 1	ammonium transport; response to estrogen stimulus; response to hormone stimulus; transmembrane transport; transport; water transport		3
ENSRNOG00000011653	FAM21_RAT	family with sequence similarity 21, member C	retrograde transport, endosome to Golgi		3
ENSRNOG00000011684	Auh	AU RNA binding protein/enoyl-coenzyme A hydratase	mRNA catabolic process; metabolic process	rno00280:Valine, leucine and isoleucine degradation	3
ENSRNOG00000011747	Tmem205	transmembrane protein 205			3
ENSRNOG00000011781	Oplah	5-oxoprolinase (ATP-hydrolysing)		rno00480:Glutathione metabolism	3
ENSRNOG00000011831	Nudt18	nudix (nucleoside diphosphate linked moiety X)-type motif 18			3
ENSRNOG00000011899	Tmem150	transmembrane protein 150A			3
ENSRNOG00000012073	Abhd14b	abhydrolase domain containing 14b			3
ENSRNOG00000012083	St6galnac2	ST6 (alpha-N-acetyl-neuraminyl-2,3-beta-galactosyl-1,3)-N-acetylgalactosaminide alpha-2,6-sialyltransferase 2	protein amino acid glycosylation		3
ENSRNOG00000012146	LOC681879	protein-O-mannosyltransferase 2	protein amino acid O-linked glycosylation	rno00514:O-Mannosyl glycan biosynthesis; rno00600:Sphingolipid metabolism	3
ENSRNOG00000012178	Lmbrd1	LMBR1 domain containing 1	transport		3
ENSRNOG00000012190	Cldn2	claudin 2	calcium-independent cell-cell adhesion	rno04514:Cell adhesion molecules (CAMs); rno04530:Tight junction; rno04670:Leukocyte transendothelial migration	3
ENSRNOG00000012247	Rab7a	RAB7A, member RAS oncogene family	bone resorption; intracellular protein transport; nucleocytoplasmic transport; protein transport; signal transduction; small GTPase mediated signal transduction		3
ENSRNOG00000012322	Pex7	peroxisomal biogenesis factor 7	endochondral ossification; fatty acid beta-oxidation; neuron migration		3
ENSRNOG00000012347	Gata2	GATA binding protein 2	cell fate determination; cell maturation; embryonic placenta development; neuron differentiation; pituitary gland development; positive regulation of angiogenesis; positive regulation of gene-specific transcription from RNA polymerase II promoter; positive regulation of phagocytosis		3
ENSRNOG00000012406	Pcbp4	poly(rC) binding protein 4			3
ENSRNOG00000012417	Iapp	islet amyloid polypeptide	glucose metabolic process; negative regulation of bone resorption; negative regulation of cell differentiation; sensory perception of pain	rno04950:Maturity onset diabetes of the young	3
ENSRNOG00000012557	Lgals5	lectin, galactose binding, soluble 5; rCG35210-like			3
ENSRNOG00000012597	RGD1311805	similar to RIKEN cDNA 2400010D15			3
ENSRNOG00000012705	Pcgf2	polycomb group ring finger 2	anterior/posterior pattern formation; embryonic skeletal system morphogenesis; histone acetylation; in utero embryonic development; negative regulation of apoptosis; negative regulation of transcription from RNA polymerase II promoter		3
ENSRNOG00000012729	Mfsd8	major facilitator superfamily domain containing 8	transmembrane transport	rno04142:Lysosome	3
ENSRNOG00000012764	Agap3	ArfGAP with GTPase domain, ankyrin repeat and PH domain 3	protein transport; regulation of ARF GTPase activity; small GTPase mediated signal transduction	rno04144:Endocytosis	3
ENSRNOG00000012795	Cables1	Cdk5 and Abl enzyme substrate 1	nervous system development; regulation of cell cycle		3
ENSRNOG00000012801	Gsto2	glutathione S-transferase omega 2	cell redox homeostasis; metabolic process		3
ENSRNOG00000012811	Spint1	serine peptidase inhibitor, Kunitz type 1	branching involved in embryonic placenta morphogenesis; embryonic placenta development; extracellular matrix organization; morphogenesis of a branching structure		3
ENSRNOG00000012820	Add3	adducin 3 (gamma)			3
ENSRNOG00000012933	Prcc	papillary renal cell carcinoma (translocation-associated)			3
ENSRNOG00000013039	Add1	adducin 1 (alpha)	cell morphogenesis; cell volume homeostasis; cytoskeleton organization; erythrocyte differentiation; hemoglobin metabolic process; homeostasis of number of cells within a tissue; in utero embryonic development; ion transport; multicellular organism growth		3
ENSRNOG00000013111	Mettl3	methyltransferase-like 3	nucleobase, nucleoside, nucleotide and nucleic acid metabolic process		3
ENSRNOG00000013172	Nr1h3	nuclear receptor subfamily 1, group H, member 3	cellular lipid metabolic process; cholesterol homeostasis; insulin receptor signaling pathway; negative regulation of proteolysis; negative regulation of transcription; positive regulation of cholesterol efflux; positive regulation of gene-specific transcription from RNA polymerase II promoter; triglyceride homeostasis	rno03320:PPAR signaling pathway	3
ENSRNOG00000013223	FAAA_RAT	fumarylacetoacetate hydrolase	L-phenylalanine catabolic process; aromatic amino acid family metabolic process; metabolic process	rno00350:Tyrosine metabolism	3
ENSRNOG00000013383	Tmub1	transmembrane and ubiquitin-like domain containing 1			3
ENSRNOG00000013520	RGD1560523	methionine adenosyltransferase II, alpha; rCG56483-like; similar to S-adenosylmethionine synthetase gamma form (Methionine adenosyltransferase)	circadian rhythm; one-carbon metabolic process; response to cAMP; response to drug; response to hormone stimulus; response to light stimulus	rno00270:Cysteine and methionine metabolism; rno00450:Selenoamino acid metabolism	3
ENSRNOG00000013728	Polg2	polymerase (DNA directed), gamma 2, accessory subunit	translation		3
ENSRNOG00000013766	Acaa2	acetyl-Coenzyme A acyltransferase 2	fatty acid metabolic process; lipid metabolic process; metabolic process	rno00062:Fatty acid elongation in mitochondria; rno00071:Fatty acid metabolism; rno00280:Valine, leucine and isoleucine degradation	3
ENSRNOG00000013767	RGD1307390	coiled-coil domain containing 61			3
ENSRNOG00000013820	Tnfrsf14	tumor necrosis factor receptor superfamily, member 14 (herpesvirus entry mediator)	positive regulation of peptidyl-tyrosine phosphorylation	rno04060:Cytokine-cytokine receptor interaction	3
ENSRNOG00000013934	St5	suppression of tumorigenicity 5	ATP synthesis coupled proton transport; positive regulation of ERK1 and ERK2 cascade		3
ENSRNOG00000013982	Hsd17b2	hydroxysteroid (17-beta) dehydrogenase 2	metabolic process; oxidation reduction; response to retinoic acid; steroid biosynthetic process	rno00140:Steroid hormone biosynthesis	3
ENSRNOG00000014090	Retsat	retinol saturase (all trans retinol 13,14 reductase)	oxidation reduction; retinol metabolic process	rno00830:Retinol metabolism	3
ENSRNOG00000014190	HINT3_RAT	histidine triad nucleotide binding protein 3			3
ENSRNOG00000014192	RGD1559923	N-acetyltransferase 12 (GCN5-related, putative)	metabolic process		3
ENSRNOG00000014235	Lime1	zinc finger, CCCH-type with G patch domain; Lck interacting transmembrane adaptor 1	negative regulation of transcription, DNA-dependent; regulation of transcription		3
ENSRNOG00000014252	Irf2bp1	interferon regulatory factor 2 binding protein 1			3
ENSRNOG00000014268	Abca2	ATP-binding cassette, subfamily A (ABC1), member 2	cholesterol homeostasis; regulation of transcription from RNA polymerase II promoter; response to steroid hormone stimulus; transport	rno02010:ABC transporters; rno04142:Lysosome	3
ENSRNOG00000014340	Pdcd7	programmed cell death 7			3
ENSRNOG00000014347	Slc4a2	solute carrier family 4 (anion exchanger), member 2	anion transport; chloride transport; transport		3
ENSRNOG00000014477	Acvr2b	activin A receptor, type IIB	BMP signaling pathway; activation of protein kinase activity; anterior/posterior pattern formation; determination of left/right symmetry; embryonic foregut morphogenesis; gastrulation with mouth forming second; heart development; insulin secretion; kidney development; lung development; mesoderm development; odontogenesis of dentine-containing tooth; organ growth; palate development; pancreas deve…	rno04060:Cytokine-cytokine receptor interaction; rno04350:TGF-beta signaling pathway	3
ENSRNOG00000014522	Mlycd	malonyl-CoA decarboxylase	fatty acid biosynthetic process	rno00410:beta-Alanine metabolism; rno00640:Propanoate metabolism	3
ENSRNOG00000014602	Mtfmt	mitochondrial methionyl-tRNA formyltransferase	biosynthetic process; translation	rno00670:One carbon pool by folate; rno00970:Aminoacyl-tRNA biosynthesis	3
ENSRNOG00000014605	Lig4	ligase IV, DNA, ATP-dependent	DNA recombination; DNA repair; DNA replication; T cell differentiation in the thymus; cell proliferation; central nervous system development; chromosome organization; double-strand break repair via nonhomologous end joining; in utero embryonic development; isotype switching; negative regulation of neuron apoptosis; positive regulation of fibroblast proliferation; positive regulation of neurogenes…	rno03450:Non-homologous end-joining	3
ENSRNOG00000014714	Trpv6	transient receptor potential cation channel, subfamily V, member 6	calcium ion transport; ion transport; transmembrane transport		3
ENSRNOG00000014857	RGD1560065	similar to RIKEN cDNA 2410004B18			3
ENSRNOG00000014946	LOC682025	THUMP domain containing 1			3
ENSRNOG00000015026	ARHGB_RAT	Rho guanine nucleotide exchange factor (GEF) 11	intracellular signaling cascade; regulation of Rho protein signal transduction	rno04270:Vascular smooth muscle contraction	3
ENSRNOG00000015035	Myo7b	myosin VIIb	response to antibiotic		3
ENSRNOG00000015143	Siah1a	seven in absentia 1A	apoptosis; cell cycle; cell differentiation; multicellular organismal development; protein ubiquitination during ubiquitin-dependent protein catabolic process; spermatogenesis; ubiquitin-dependent protein catabolic process	rno04115:p53 signaling pathway; rno04120:Ubiquitin mediated proteolysis; rno04310:Wnt signaling pathway	3
ENSRNOG00000015159	Slc9a3	solute carrier family 9 (sodium/hydrogen exchanger), member 3	cation transport; circadian rhythm; receptor-mediated endocytosis; regulation of pH; regulation of sodium ion transport; response to glucocorticoid stimulus; sodium ion transport; transmembrane transport		3
ENSRNOG00000015162	Lonp2	lon peptidase 2, peroxisomal	peroxisome organization; protein processing; proteolysis; response to organic cyclic substance		3
ENSRNOG00000015205	Cyb5a	cytochrome b5 type A (microsomal)	electron transport chain; response to cadmium ion; transport		3
ENSRNOG00000015221	Eif3f	eukaryotic translation initiation factor 3, subunit F	translational initiation		3
ENSRNOG00000015347	Trim45	tripartite motif-containing 45			3
ENSRNOG00000015354	ADO_RAT	aldehyde oxidase 1	drug metabolic process; oxidation reduction; xenobiotic metabolic process	rno00280:Valine, leucine and isoleucine degradation; rno00350:Tyrosine metabolism; rno00380:Tryptophan metabolism; rno00750:Vitamin B6 metabolism; rno00760:Nicotinate and nicotinamide metabolism; rno00982:Drug metabolism	3
ENSRNOG00000015365	LOC363265	collagen, type IV, alpha 3	activation of caspase activity; cell surface receptor linked signal transduction; induction of apoptosis; negative regulation of angiogenesis; response to glucose stimulus		3
ENSRNOG00000015366	Neurl3	neuralized homolog 3 (Drosophila)	modification-dependent protein catabolic process		3
ENSRNOG00000015438	LOC683107	carboxylesterase 1E		rno00983:Drug metabolism	3
ENSRNOG00000015450	Ppp1r16a	protein phosphatase 1, regulatory (inhibitor) subunit 16A			3
ENSRNOG00000015567	Slc9a2	solute carrier family 9 (sodium/hydrogen exchanger), member 2	cation transport; protein localization; regulation of pH; sodium ion transport; transmembrane transport		3
ENSRNOG00000015593	Sigirr	single immunoglobulin and toll-interleukin 1 receptor (TIR) domain	acute-phase response; innate immune response; negative regulation of transcription factor activity; signal transduction		3
ENSRNOG00000015690	Adad2	adenosine deaminase domain containing 2	RNA processing		3
ENSRNOG00000015732	Bcl2l2	Bcl2-like 2	regulation of apoptosis		3
ENSRNOG00000015749	Nme3	non-metastatic cells 3, protein expressed in	CTP biosynthetic process; GTP biosynthetic process; UTP biosynthetic process	rno00230:Purine metabolism; rno00240:Pyrimidine metabolism	3
ENSRNOG00000015825	Aurkc	aurora kinase C	protein amino acid phosphorylation		3
ENSRNOG00000015851	Nat8b	N-acetyltransferase 8B	gastrulation with mouth forming second; metabolic process; multicellular organismal development		3
ENSRNOG00000015932	RGD1306839	similar to RIKEN cDNA 5033414D02			3
ENSRNOG00000016204	MGC94207	leucine rich repeat containing 24; similar to RIKEN cDNA C030006K11			3
ENSRNOG00000016255	Podxl2	podocalyxin-like 2			3
ENSRNOG00000016465	Trmu	tRNA 5-methylaminomethyl-2-thiouridylate methyltransferase	metabolic process; oxidation reduction; tRNA processing		3
ENSRNOG00000016608	Znf579	zinc finger protein 579			3
ENSRNOG00000016619	Use1	unconventional SNARE in the ER 1 homolog (S. cerevisiae)	protein catabolic process	rno04130:SNARE interactions in vesicular transport	3
ENSRNOG00000016707	Casp2	caspase 2	apoptosis; induction of apoptosis; positive regulation of apoptosis; protein maturation by peptide bond cleavage; proteolysis; regulation of apoptosis		3
ENSRNOG00000016717	Gas2	growth arrest-specific 2	cell cycle arrest		3
ENSRNOG00000016875	Cbx7	chromobox homolog 7	chromatin assembly or disassembly; chromatin modification; regulation of transcription		3
ENSRNOG00000016935	Mapk1ip1	mitogen-activated protein kinase 1 interacting protein 1			3
ENSRNOG00000016948	Nhlrc2	NHL repeat containing 2			3
ENSRNOG00000016971	Znf23	zinc finger protein 23 (KOX 16)	regulation of transcription		3
ENSRNOG00000017045	Zdhhc1	zinc finger, DHHC-type containing 1	protein palmitoylation		3
ENSRNOG00000017086	LOC296300	similar to zinc finger protein 341			3
ENSRNOG00000017188	Cyp27a1	cytochrome P450, family 27, subfamily a, polypeptide 1	cholesterol metabolic process; oxidation reduction	rno00120:Primary bile acid biosynthesis; rno03320:PPAR signaling pathway	3
ENSRNOG00000017291	Sord	sorbitol dehydrogenase	oxidation reduction; response to cadmium ion; response to copper ion; response to drug; response to hormone stimulus; response to nutrient levels; response to osmotic stress	rno00051:Fructose and mannose metabolism	3
ENSRNOG00000017294	Zranb1	zinc finger, RAN-binding domain containing 1 protein-like	positive regulation of Wnt receptor signaling pathway		3
ENSRNOG00000017309	RGD1359529	similar to chromosome 1 open reading frame 63			3
ENSRNOG00000017373	Rhobtb2	Rho-related BTB domain containing 2	protein transport; small GTPase mediated signal transduction	rno04120:Ubiquitin mediated proteolysis	3
ENSRNOG00000017401	TMCO4_RAT	transmembrane and coiled-coil domains 4			3
ENSRNOG00000017406	Atrnl1	attractin like 1	cell communication; cellular amino acid metabolic process		3
ENSRNOG00000017414	Irf7	interferon regulatory factor 7	immunoglobulin mediated immune response; response to virus; type I interferon biosynthetic process	rno04620:Toll-like receptor signaling pathway; rno04622:RIG-I-like receptor signaling pathway; rno04623:Cytosolic DNA-sensing pathway	3
ENSRNOG00000017419	Map3k4	mitogen activated protein kinase kinase kinase 4	protein amino acid phosphorylation	rno04010:MAPK signaling pathway; rno04912:GnRH signaling pathway	3
ENSRNOG00000017467	Rab4a	RAB4A, member RAS oncogene family	Rab protein signal transduction; intracellular protein transport; nucleocytoplasmic transport; protein transport; regulation of endocytosis; signal transduction; small GTPase mediated signal transduction	rno04144:Endocytosis	3
ENSRNOG00000017532	Tesk1	testis-specific kinase 1	protein amino acid phosphorylation; spermatogenesis		3
ENSRNOG00000017552	Mrpl34	mitochondrial ribosomal protein L34	translation		3
ENSRNOG00000017577	Bphl	biphenyl hydrolase-like (serine hydrolase)			3
ENSRNOG00000017579	Mylip	myosin regulatory light chain interacting protein	cellular component movement; cholesterol homeostasis; nervous system development; positive regulation of protein catabolic process; protein destabilization; protein ubiquitination; protein ubiquitination during ubiquitin-dependent protein catabolic process		3
ENSRNOG00000017619	Aldh1a1	aldehyde dehydrogenase 1 family, member A1	9-cis-retinoic acid biosynthetic process; embryonic eye morphogenesis; estrous cycle phase; kidney development; liver development; metabolic process; oxidation reduction; positive regulation of apoptosis; protein homotetramerization; response to drug; response to estradiol stimulus; response to ethanol; response to organic cyclic substance; response to oxidative stress; response to retinoic acid;…	rno00830:Retinol metabolism	3
ENSRNOG00000017621	Spns1	spinster homolog 1 (Drosophila)	lipid transport; transmembrane transport; transport		3
ENSRNOG00000017647	Zc3h8	zinc finger CCCH type containing 8	T cell homeostasis; negative regulation of transcription; response to antibiotic		3
ENSRNOG00000017777	Ahcy	adenosylhomocysteinase	metabolic process; one-carbon metabolic process; response to hypoxia; response to nutrient	rno00270:Cysteine and methionine metabolism; rno00450:Selenoamino acid metabolism	3
ENSRNOG00000017808	Klf15	Kruppel-like factor 15	positive regulation of transcription, DNA-dependent; glucose transport		3
ENSRNOG00000017849	Apbb3	amyloid beta (A4) precursor protein-binding, family B, member 3			3
ENSRNOG00000017866	Sirt5	sirtuin (silent mating type information regulation 2 homolog) 5 (S. cerevisiae)	chromatin silencing; protein amino acid deacetylation; regulation of transcription		3
ENSRNOG00000017876	Dnajc21	DnaJ (Hsp40) homolog, subfamily C, member 21			3
ENSRNOG00000017887	Mutyh	mutY homolog (E. coli)	DNA repair; base-excision repair; metabolic process; response to DNA damage stimulus; response to oxidative stress	rno03410:Base excision repair	3
ENSRNOG00000017916	Rexo1	REX1, RNA exonuclease 1 homolog (S. cerevisiae)			3
ENSRNOG00000017930	Lpcat1	lysophosphatidylcholine acyltransferase 1	metabolic process; phospholipid biosynthetic process		3
ENSRNOG00000017941	Optn	optineurin	Golgi organization; cellular protein localization		3
ENSRNOG00000018051	Farp2	FERM, RhoGEF and pleckstrin domain protein 2	Rac protein signal transduction; neuron remodeling; regulation of Rho protein signal transduction	rno04520:Adherens junction	3
ENSRNOG00000018052	Cnksr3	Cnksr family member 3	regulation of signal transduction		3
ENSRNOG00000018114	Acadvl	acyl-Coenzyme A dehydrogenase, very long chain	fatty acid beta-oxidation; fatty acid metabolic process; lipid metabolic process; metabolic process; negative regulation of fatty acid biosynthetic process; oxidation reduction; temperature homeostasis	rno00071:Fatty acid metabolism	3
ENSRNOG00000018170	Slc27a1	solute carrier family 27 (fatty acid transporter), member 1	fatty acid metabolic process; lipid metabolic process; lipid transport; long-chain fatty acid transport; metabolic process; phosphatidic acid biosynthetic process; phosphatidylcholine biosynthetic process; phosphatidylethanolamine biosynthetic process; phosphatidylinositol biosynthetic process; response to cold; response to insulin stimulus; transport	rno03320:PPAR signaling pathway	3
ENSRNOG00000018211	Urod	uroporphyrinogen decarboxylase	heme biosynthetic process; porphyrin biosynthetic process	rno00860:Porphyrin and chlorophyll metabolism	3
ENSRNOG00000018246	Ttrap	Traf and Tnf receptor associated protein	double-strand break repair; response to DNA damage stimulus		3
ENSRNOG00000018282	Gda	guanine deaminase		rno00230:Purine metabolism	3
ENSRNOG00000018321	Sytl3	synaptotagmin-like 3	intracellular protein transport		3
ENSRNOG00000018340	Marveld2	MARVEL domain containing 2			3
ENSRNOG00000018379	Znf688	zinc finger protein 688			3
ENSRNOG00000018406	Wipf1	WAS/WASL interacting protein family, member 1	actin cytoskeleton organization; actin filament-based movement		3
ENSRNOG00000018433	Hps6	Hermansky-Pudlak syndrome 6	blood coagulation; melanocyte differentiation; organelle organization; pigmentation		3
ENSRNOG00000018440	Arfip2	ADP-ribosylation factor interacting protein 2	actin cytoskeleton organization		3
ENSRNOG00000018516	Impa2	inositol (myo)-1(or 4)-monophosphatase 2		rno00562:Inositol phosphate metabolism; rno04070:Phosphatidylinositol signaling system	3
ENSRNOG00000018549	Fbxo18	F-box only protein 18	DNA repair		3
ENSRNOG00000018580	Klk8	kallikrein related-peptidase 8	cell death; keratinocyte proliferation; memory; neuron projection morphogenesis; proteolysis; response to wounding		3
ENSRNOG00000018606	Olr59	olfactory receptor 59	response to stimulus; sensory perception of smell; signal transduction	rno04740:Olfactory transduction	3
ENSRNOG00000018623	Rev1	REV1 homolog (S. cerevisiae)	DNA repair; response to UV		3
ENSRNOG00000018648	Mppe1	metallophosphoesterase 1			3
ENSRNOG00000018662	Amacr	alpha-methylacyl-CoA racemase	bile acid biosynthetic process; metabolic process	rno00120:Primary bile acid biosynthesis	3
ENSRNOG00000018683	Dock1	dedicator of cyto-kinesis 1	cell migration		3
ENSRNOG00000018709	Zfp278	zinc finger protein 278	T cell differentiation		3
ENSRNOG00000018788	Btbd2	BTB (POZ) domain containing 2			3
ENSRNOG00000018859	P3IP1_RAT	phosphoinositide-3-kinase interacting protein 1			3
ENSRNOG00000018962	Ctf1	cardiotrophin 1	immune response; nervous system development; neuron development	rno04060:Cytokine-cytokine receptor interaction; rno04630:Jak-STAT signaling pathway	3
ENSRNOG00000018996	Phf7	PHD finger protein 7			3
ENSRNOG00000019020	Bbs2	Bardet-Biedl syndrome 2	adult behavior; brain morphogenesis; cerebral cortex development; cilium morphogenesis; fat cell differentiation; hippocampus development; negative regulation of multicellular organism growth; photoreceptor cell maintenance; protein localization; striatum development		3
ENSRNOG00000019039	INP5E_RAT	SEC16 homolog A (S. cerevisiae)	lipid metabolic process; phosphoinositide metabolic process; positive regulation of neuron projection development		3
ENSRNOG00000019112	Chp2	calcineurin B homologous protein 2	cellular sodium ion homeostasis; regulation of cellular pH	rno04010:MAPK signaling pathway; rno04020:Calcium signaling pathway; rno04114:Oocyte meiosis; rno04210:Apoptosis; rno04310:Wnt signaling pathway; rno04360:Axon guidance; rno04370:VEGF signaling pathway; rno04650:Natural killer cell mediated cytotoxicity; rno04660:T cell receptor signaling pathway; rno04662:B cell receptor signaling pathway; rno04720:Long-term potentiation; rno05010:Alzheimer's di…	3
ENSRNOG00000019120	Hmgcs2	3-hydroxy-3-methylglutaryl-Coenzyme A synthase 2 (mitochondrial)	cholesterol biosynthetic process; isoprenoid biosynthetic process; metabolic process; response to drug; response to nutrient; response to peptide hormone stimulus	rno00072:Synthesis and degradation of ketone bodies; rno00280:Valine, leucine and isoleucine degradation; rno00650:Butanoate metabolism; rno00900:Terpenoid backbone biosynthesis; rno03320:PPAR signaling pathway	3
ENSRNOG00000019142	Fas	Fas (TNF receptor superfamily, member 6)	activation-induced cell death of T cells; aging; gene expression; immune response; induction of apoptosis via death domain receptors; negative regulation of apoptosis; negative thymic T cell selection; ovulation cycle; positive regulation of apoptosis; protein homooligomerization; response to cytokine stimulus; response to drug; response to estrogen stimulus; response to glucocorticoid stimulus; …	rno04010:MAPK signaling pathway; rno04060:Cytokine-cytokine receptor interaction; rno04115:p53 signaling pathway; rno04210:Apoptosis; rno04650:Natural killer cell mediated cytotoxicity; rno04940:Type I diabetes mellitus; rno05010:Alzheimer's disease; rno05200:Pathways in cancer; rno05320:Autoimmune thyroid disease; rno05330:Allograft rejection; rno05332:Graft-versus-host disease	3
ENSRNOG00000019186	Tmem53	transmembrane protein 53			3
ENSRNOG00000019201	B0BNM1_RAT	apolipoprotein A-I binding protein			3
ENSRNOG00000019276	RGD735029	SEL1 domain containing protein RGD735029			3
ENSRNOG00000019361	Inpp5j	inositol polyphosphate-5-phosphatase J	negative regulation of peptidyl-serine phosphorylation	rno00562:Inositol phosphate metabolism; rno04070:Phosphatidylinositol signaling system	3
ENSRNOG00000019369	Giyd2	GIY-YIG domain containing 2	DNA recombination; DNA repair; response to DNA damage stimulus		3
ENSRNOG00000019438	Rnf31	ring finger protein 31			3
ENSRNOG00000019481	Cyp8b1	cytochrome P450, family 8, subfamily b, polypeptide 1		rno00120:Primary bile acid biosynthesis; rno03320:PPAR signaling pathway	3
ENSRNOG00000019650	Rbm4b	RNA binding motif protein 4B	RNA splicing; mRNA processing		3
ENSRNOG00000019656	Btd	biotinidase	nitrogen compound metabolic process	rno00780:Biotin metabolism	3
ENSRNOG00000019667	Ppfibp2	PTPRF interacting protein, binding protein 2 (liprin beta 2)	DNA integration		3
ENSRNOG00000019704	Resp18	regulated endocrine-specific protein 18	biological_process		3
ENSRNOG00000019785	Phtf1	putative homeodomain transcription factor 1	spermatogenesis		3
ENSRNOG00000019802	Zfp428	zinc finger protein 428			3
ENSRNOG00000019812	Nr1h2	nuclear receptor subfamily 1, group H, member 2	positive regulation of transcription, DNA-dependent; cellular lipid metabolic process; cholesterol homeostasis; lipid homeostasis; negative regulation of gene-specific transcription from RNA polymerase II promoter; negative regulation of proteolysis; negative regulation of transcription; positive regulation of cellular protein metabolic process; positive regulation of cholesterol efflux; positive…		3
ENSRNOG00000019922	RGD1306192	similar to RIKEN cDNA 2310079N02			3
ENSRNOG00000019930	Rhot2	ras homolog gene family, member T2	apoptosis; protein transport; small GTPase mediated signal transduction		3
ENSRNOG00000019932	Ip6k1	inositol hexakisphosphate kinase 1	phosphoinositide phosphorylation		3
ENSRNOG00000019933	Ubqln4	ubiquilin 4			3
ENSRNOG00000019992	Q6QI81_RAT	similar to 4921517L17Rik protein	translation		3
ENSRNOG00000020010	Kctd13	potassium channel tetramerisation domain containing 13	DNA repair; DNA replication; actin cytoskeleton organization; potassium ion transport; protein heterooligomerization; protein homooligomerization; regulation of transcription		3
ENSRNOG00000020014	Myh14	myosin, heavy chain 14	actin filament-based movement	rno04530:Tight junction; rno04810:Regulation of actin cytoskeleton; rno05416:Viral myocarditis	3
ENSRNOG00000020139	RGD1565775	similar to RIKEN cDNA 2810403A07			3
ENSRNOG00000020142	Lass1	growth differentiation factor 1	growth		3
ENSRNOG00000020308	Ech1	enoyl coenzyme A hydratase 1, peroxisomal	fatty acid metabolic process; lipid metabolic process; metabolic process		3
ENSRNOG00000020350	Pacs1	phosphofurin acidic cluster sorting protein 1			3
ENSRNOG00000020369	Igf2	insulin-like growth factor 2	carbohydrate metabolic process; cell proliferation; exocrine pancreas development; glucose metabolic process; organ morphogenesis; osteoblast differentiation; positive regulation of MAPKKK cascade; positive regulation of cell division; positive regulation of mitosis; positive regulation of protein kinase B signaling cascade; response to drug; response to estradiol stimulus; response to nicotine; …		3
ENSRNOG00000020372	Hdac4	histone deacetylase 4	chromatin modification; chromatin remodeling; histone deacetylation; negative regulation of cell proliferation; negative regulation of gene-specific transcription from RNA polymerase II promoter; negative regulation of osteoblast differentiation; negative regulation of transcription factor activity; negative regulation of transcription from RNA polymerase II promoter; osteoblast development; posi…		3
ENSRNOG00000020376	Obfc1	oligonucleotide/oligosaccharide-binding fold containing 1			3
ENSRNOG00000020441	Wnk4	WNK lysine deficient protein kinase 4; cyclin N-terminal domain containing 1; vacuolar protein sorting 25 homolog (S. cerevisiae)	chloride transport; ion transport; protein amino acid phosphorylation; protein kinase cascade; protein localization; protein transport; regulation of transcription	rno04144:Endocytosis	3
ENSRNOG00000020457	Tacc2	transforming, acidic coiled-coil containing protein 2	cell proliferation; cerebral cortex development; interkinetic nuclear migration; microtubule cytoskeleton organization; neurogenesis; regulation of microtubule-based process		3
ENSRNOG00000020459	RGS11_RAT	regulator of G-protein signaling 11	intracellular signaling cascade; negative regulation of signal transduction; regulation of G-protein coupled receptor protein signaling pathway		3
ENSRNOG00000020466	Apba3	amyloid beta (A4) precursor protein-binding, family A, member 3	in utero embryonic development; protein transport; regulation of gene expression; synaptic transmission		3
ENSRNOG00000020576	RGD1310942	cation channel, sperm-associated, gamma 1			3
ENSRNOG00000020607	Bckdha	branched chain ketoacid dehydrogenase E1, alpha polypeptide	positive regulation of transcription, DNA-dependent; branched chain family amino acid catabolic process; metabolic process; oxidation reduction; response to cAMP; response to glucocorticoid stimulus; response to nutrient	rno00280:Valine, leucine and isoleucine degradation	3
ENSRNOG00000020678	Ifi35	interferon-induced protein 35			3
ENSRNOG00000020714	Trpm4	transient receptor potential cation channel, subfamily M, member 4	calcium ion transport; immune response; ion transport; transmembrane transport		3
ENSRNOG00000020751	Rdm1	RAD52 motif 1			3
ENSRNOG00000020769	RGD1310862	similar to adult retina protein			3
ENSRNOG00000020833	Cspg5	chondroitin sulfate proteoglycan 5	regulation of synaptic transmission		3
ENSRNOG00000020878	Keap1	Kelch-like ECH-associated protein 1	in utero embryonic development; regulation of transcription	rno04120:Ubiquitin mediated proteolysis	3
ENSRNOG00000020918	Ccnd1	cyclin D1	G1/S transition of mitotic cell cycle; Leydig cell differentiation; Wnt receptor signaling pathway through beta-catenin; cell division; cellular response to DNA damage stimulus; endoplasmic reticulum unfolded protein response; fat cell differentiation; lactation; liver development; mammary gland alveolus development; mammary gland epithelial cell proliferation; negative regulation of Wnt receptor…	rno04110:Cell cycle; rno04115:p53 signaling pathway; rno04310:Wnt signaling pathway; rno04510:Focal adhesion; rno04630:Jak-STAT signaling pathway; rno05200:Pathways in cancer; rno05210:Colorectal cancer; rno05212:Pancreatic cancer; rno05213:Endometrial cancer; rno05214:Glioma; rno05215:Prostate cancer; rno05216:Thyroid cancer; rno05218:Melanoma; rno05219:Bladder cancer; rno05220:Chronic myeloid l…	3
ENSRNOG00000021007	Snx15	sorting nexin 15	cell communication; protein transport		3
ENSRNOG00000021025	Ppp2r5b	protein phosphatase 2, regulatory subunit B', beta isoform	signal transduction	rno04114:Oocyte meiosis; rno04310:Wnt signaling pathway	3
ENSRNOG00000021174	Macrod1	MACRO domain containing 1			3
ENSRNOG00000021287	Hexim2	hexamthylene bis-acetamide inducible 2	negative regulation of cyclin-dependent protein kinase activity; negative regulation of transcription from RNA polymerase II promoter		3
ENSRNOG00000021303	Lrrc48	leucine rich repeat containing 48			3
ENSRNOG00000021316	Tmem98	transmembrane protein 98			3
ENSRNOG00000021324	RGD1565059	similar to hypothetical protein E130311K13			3
ENSRNOG00000021441	Reln	reelin	axon guidance; brain development; cell adhesion; cell communication; cell morphogenesis involved in differentiation; glial cell differentiation; locomotory behavior; multicellular organismal development; neuron migration; peptidyl-tyrosine phosphorylation; positive regulation of protein kinase activity; response to pain	rno04510:Focal adhesion; rno04512:ECM-receptor interaction	3
ENSRNOG00000021602	Zmynd10	zinc finger, MYND-type containing 10			3
ENSRNOG00000021817	Irak2	interleukin-1 receptor-associated kinase 2	interleukin-1-mediated signaling pathway; lipopolysaccharide-mediated signaling pathway; negative regulation of NF-kappaB transcription factor activity; positive regulation of NF-kappaB transcription factor activity; protein amino acid phosphorylation; response to interleukin-1; signal transduction	rno04210:Apoptosis; rno04722:Neurotrophin signaling pathway	3
ENSRNOG00000021984	Rgs7	regulator of G-protein signaling 7	intracellular signaling cascade; negative regulation of signal transduction; regulation of G-protein coupled receptor protein signaling pathway		3
ENSRNOG00000022171	Dhx37	DEAH (Asp-Glu-Ala-His) box polypeptide 37			3
ENSRNOG00000022216	Abr	active BCR-related gene	intracellular signaling cascade; regulation of Rho protein signal transduction; signal transduction		3
ENSRNOG00000022218	B0BNB7_RAT	interferon-induced protein 44			3
ENSRNOG00000022572	LOC679129	peroxisomal biogenesis factor 19; peroxisomal biogenesis factor 19-like; similar to Peroxisomal biogenesis factor 19 (Peroxin-19) (Peroxisomal farnesylated protein)			3
ENSRNOG00000022588	Akr1c12	aldo-keto reductase family 1, member C12	oxidation reduction		3
ENSRNOG00000022684	Gpc3	glypican 3	branching involved in ureteric bud morphogenesis; negative regulation of cell proliferation; negative regulation of growth; negative regulation of smoothened signaling pathway; organ morphogenesis; positive regulation of BMP signaling pathway; positive regulation of endocytosis; positive regulation of protein catabolic process		3
ENSRNOG00000022921	Dact2	dapper, antagonist of beta-catenin, homolog 2 (Xenopus laevis)			3
ENSRNOG00000022946	Slc22a3	solute carrier family 22 (extraneuronal monoamine transporter), member 3	dopamine transport; ion transport; quaternary ammonium group transport; transmembrane transport; transport		3
ENSRNOG00000023116	Tmem195	transmembrane protein 195	fatty acid biosynthetic process; oxidation reduction		3
ENSRNOG00000023366	Styxl1	serine/threonine/tyrosine interacting-like 1	protein amino acid dephosphorylation		3
ENSRNOG00000023393	Nup214	nucleoporin 214	mRNA export from nucleus; protein import into nucleus; regulation of cell cycle		3
ENSRNOG00000023410	Apol9a	apolipoprotein L 9a	lipid transport; lipoprotein metabolic process; transmembrane transport; transport		3
ENSRNOG00000023455	Pomgnt1	protein O-linked mannose beta1,2-N-acetylglucosaminyltransferase	protein amino acid N-linked glycosylation; protein amino acid O-linked glycosylation	rno00514:O-Mannosyl glycan biosynthesis	3
ENSRNOG00000023465	LOC500300	similar to hypothetical protein MGC6835			3
ENSRNOG00000023746	TM39B_RAT	transmembrane protein 39b			3
ENSRNOG00000023753	Mllt4	myeloid/lymphoid or mixed-lineage leukemia (trithorax homolog, Drosophila); translocated to, 4	cell adhesion; signal transduction	rno04520:Adherens junction; rno04530:Tight junction; rno04670:Leukocyte transendothelial migration	3
ENSRNOG00000023851	Igsf3	immunoglobulin superfamily, member 3			3
ENSRNOG00000024036	RGD1303117	hypothetical protein LOC292764			3
ENSRNOG00000024111	Cage1	cancer antigen 1	protein amino acid phosphorylation; signal transduction		3
ENSRNOG00000024947	Fabp2	fatty acid binding protein 2, intestinal	fatty acid metabolic process; intestinal absorption; long-chain fatty acid transport; transport	rno03320:PPAR signaling pathway	3
ENSRNOG00000024972	LOC687381	similar to COX10 homolog, cytochrome c oxidase assembly protein, heme A: farnesyltransferase	aerobic respiration; mitochondrion organization; respiratory chain complex IV assembly	rno00190:Oxidative phosphorylation; rno00860:Porphyrin and chlorophyll metabolism	3
ENSRNOG00000025067	Mocs3	molybdenum cofactor synthesis 3	Mo-molybdopterin cofactor biosynthetic process		3
ENSRNOG00000025371	Spry1	sprouty homolog 1, antagonist of FGF signaling (Drosophila)	induction of an organ; multicellular organismal development; negative regulation of MAP kinase activity; negative regulation of Ras protein signal transduction; negative regulation of cell proliferation; negative regulation of fibroblast growth factor receptor signaling pathway; regulation of signal transduction; ureteric bud development		3
ENSRNOG00000025539	Vps13a	vacuolar protein sorting 13 homolog A (S. cerevisiae)	locomotory behavior; nervous system development; protein localization; social behavior; transport		3
ENSRNOG00000025695	RGD1564174	tensin 3	cell migration; dephosphorylation; lung alveolus development; positive regulation of cell proliferation		3
ENSRNOG00000025716	Lsm10	LSM10, U7 small nuclear RNA associated	S phase of mitotic cell cycle		3
ENSRNOG00000025832	Q5EB87_RAT	zer-1 homolog (C. elegans)			3
ENSRNOG00000025877	Prr12	proline rich 12			3
ENSRNOG00000025997	Mrrf	mitochondrial ribosome recycling factor	translation		3
ENSRNOG00000026236	Morc3	MORC family CW-type zinc finger 3	post-embryonic development		3
ENSRNOG00000026239	Arid4a	AT rich interactive domain 4A (Rbp1 like)	negative regulation of transcription, DNA-dependent; chromatin assembly or disassembly		3
ENSRNOG00000026458	Tbccd1	TBCC domain containing 1			3
ENSRNOG00000026508	Vmo1	vitelline membrane outer layer 1 homolog (chicken)			3
ENSRNOG00000026517	Vrk3	vaccinia related kinase 3	protein amino acid phosphorylation		3
ENSRNOG00000026597	Sdr42e1	short chain dehydrogenase/reductase family 42E, member 1	cellular metabolic process; metabolic process; steroid biosynthetic process		3
ENSRNOG00000026616	Ndufb2	NADH dehydrogenase (ubiquinone) 1 beta subcomplex, 2		rno00190:Oxidative phosphorylation; rno05010:Alzheimer's disease; rno05012:Parkinson's disease; rno05016:Huntington's disease	3
ENSRNOG00000026849	Hnrnph3	heterogeneous nuclear ribonucleoprotein H3 (2H9)			3
ENSRNOG00000026985	Phldb1	pleckstrin homology-like domain, family B, member 1			3
ENSRNOG00000027179	Zdhhc23	zinc finger, DHHC-type containing 23			3
ENSRNOG00000027183	Zfyve9	zinc finger, FYVE domain containing 9		rno04350:TGF-beta signaling pathway	3
ENSRNOG00000027422	Fastkd3	FAST kinase domains 3	apoptosis		3
ENSRNOG00000027552	Tapbpl	TAP binding protein-like			3
ENSRNOG00000027601	Lhfpl1	lipoma HMGIC fusion partner-like 1			3
ENSRNOG00000027730	RGD1566243	hypothetical protein LOC100360202; similar to protein of unknown function			3
ENSRNOG00000027797	Nit2	nitrilase family, member 2	nitrogen compound metabolic process		3
ENSRNOG00000027860	Ggnbp2	gametogenetin binding protein 2	cell differentiation; multicellular organismal development; spermatogenesis		3
ENSRNOG00000027891	Dhrs11	dehydrogenase/reductase (SDR family) member 11	metabolic process; oxidation reduction		3
ENSRNOG00000027901	Mrm1	mitochondrial rRNA methyltransferase 1 homolog (S. cerevisiae)	RNA processing		3
ENSRNOG00000027962	Smg7	Smg-7 homolog, nonsense mediated mRNA decay factor (C. elegans)			3
ENSRNOG00000028129	Fktn	fukutin			3
ENSRNOG00000028168	Ankrd16	ankyrin repeat domain 16			3
ENSRNOG00000028241	ITFG3_RAT	integrin alpha FG-GAP repeat containing 3; protein ITFG3-like			3
ENSRNOG00000028356	Chchd10	coiled-coil-helix-coiled-coil-helix domain containing 10			3
ENSRNOG00000028512	Ilvbl	ilvB (bacterial acetolactate synthase)-like			3
ENSRNOG00000028584	Alkbh2	alkB, alkylation repair homolog 2 (E. coli)			3
ENSRNOG00000028616	Pck1	phosphoenolpyruvate carboxykinase 1 (soluble)	gluconeogenesis; glucose homeostasis; lipid metabolic process; oxaloacetate metabolic process; response to activity; response to insulin stimulus	rno00010:Glycolysis / Gluconeogenesis; rno00020:Citrate cycle (TCA cycle); rno00620:Pyruvate metabolism; rno03320:PPAR signaling pathway; rno04910:Insulin signaling pathway; rno04920:Adipocytokine signaling pathway	3
ENSRNOG00000028895	Rtp4	receptor (chemosensory) transporter protein 4	detection of chemical stimulus involved in sensory perception of bitter taste; protein targeting to membrane		3
ENSRNOG00000028904	RGD1565149	similar to chromosome 16 open reading frame 7			3
ENSRNOG00000029007	Ugt2b34	UDP glucuronosyltransferase 2 family, polypeptide B34	metabolic process	rno00040:Pentose and glucuronate interconversions; rno00053:Ascorbate and aldarate metabolism; rno00140:Steroid hormone biosynthesis; rno00500:Starch and sucrose metabolism; rno00830:Retinol metabolism; rno00860:Porphyrin and chlorophyll metabolism; rno00980:Metabolism of xenobiotics by cytochrome P450; rno00982:Drug metabolism; rno00983:Drug metabolism	3
ENSRNOG00000029490	Zfp768	rCG39624-like	transcription from RNA polymerase II promoter		3
ENSRNOG00000029571	Coq10a	coenzyme Q10 homolog A (S. cerevisiae)			3
ENSRNOG00000029893	Rwdd3	RWD domain containing 3			3
ENSRNOG00000029941	Grina	glutamate receptor, ionotropic, N-methyl D-aspartate-associated protein 1 (glutamate binding)			3
ENSRNOG00000030216	Abcg3l1	ATP-binding cassette, subfamily G (WHITE), member 3-like 1		rno02010:ABC transporters	3
ENSRNOG00000030287	Acaa1	acetyl-Coenzyme A acyltransferase 1A	fatty acid metabolic process; lipid biosynthetic process; lipid metabolic process; metabolic process; response to drug; response to nutrient; response to steroid hormone stimulus	rno00071:Fatty acid metabolism; rno00280:Valine, leucine and isoleucine degradation; rno01040:Biosynthesis of unsaturated fatty acids; rno03320:PPAR signaling pathway	3
ENSRNOG00000030319	B2RYT2_RAT	MORN repeat containing 2			3
ENSRNOG00000030416	Zfp709l2	zinc finger protein 709-like 2	regulation of transcription		3
ENSRNOG00000030537	Slc26a11	solute carrier family 26, member 11	sulfate transport; transmembrane transport; transport		3
ENSRNOG00000030724	Adamdec1	ADAM-like, decysin 1	proteolysis		3
ENSRNOG00000030909	Mcpt9	mast cell protease 9	proteolysis		3
ENSRNOG00000032152	Nme4	2,4-dienoyl CoA reductase 2, peroxisomal; "non-metastatic cells 4, protein expressed in"; RAB11 family interacting protein 3 (class II)	CTP biosynthetic process; GTP biosynthetic process; UTP biosynthetic process; cytokinesis; metabolic process; oxidation reduction; protein transport; translation	rno00230:Purine metabolism; rno00240:Pyrimidine metabolism; rno04144:Endocytosis	3
ENSRNOG00000032238	Plcd1	phospholipase C, delta 1	elevation of cytosolic calcium ion concentration during G-protein signaling, coupled to IP3 second messenger (phospholipase C activating); angiogenesis; intracellular signaling cascade; labyrinthine layer blood vessel development; lipid catabolic process; lipid metabolic process; placenta development; regulation of cell proliferation; response to calcium ion; response to hyperoxia; response to or…	rno00562:Inositol phosphate metabolism; rno04020:Calcium signaling pathway; rno04070:Phosphatidylinositol signaling system	3
ENSRNOG00000032254	Sin3a	SIN3 homolog A, transcription regulator (yeast)	DNA replication; cellular protein localization; in utero embryonic development; negative regulation of apoptosis; negative regulation of transcription from RNA polymerase II promoter	rno05016:Huntington's disease	3
ENSRNOG00000032327	Pdia5	protein disulfide isomerase family A, member 5	cell redox homeostasis; response to stress		3
ENSRNOG00000032395	Tcfcp2	transcription factor CP2			3
ENSRNOG00000032441	Pan2	PAN2 polyA specific ribonuclease subunit homolog (S. cerevisiae)	nuclear-transcribed mRNA catabolic process, nonsense-mediated decay; ubiquitin-dependent protein catabolic process		3
ENSRNOG00000032539	Spag8	sperm associated antigen 8			3
ENSRNOG00000032575	Ocel1	hypothetical protein LOC680815; occludin/ELL domain containing 1			3
ENSRNOG00000032717	Mcpt10	mast cell protease 10	proteolysis	rno04080:Neuroactive ligand-receptor interaction; rno04142:Lysosome; rno04614:Renin-angiotensin system; rno05322:Systemic lupus erythematosus	3
ENSRNOG00000032908	THIKB_RAT	acetyl-Coenzyme A acyltransferase 1B	fatty acid metabolic process; lipid biosynthetic process; lipid metabolic process; metabolic process	rno00071:Fatty acid metabolism; rno00280:Valine, leucine and isoleucine degradation; rno01040:Biosynthesis of unsaturated fatty acids; rno03320:PPAR signaling pathway	3
ENSRNOG00000032945	Ctdspl	CTD (carboxy-terminal domain, RNA polymerase II, polypeptide A) small phosphatase-like			3
ENSRNOG00000033206	Entpd5	ectonucleoside triphosphate diphosphohydrolase 5		rno00230:Purine metabolism; rno00240:Pyrimidine metabolism	3
ENSRNOG00000033809	Mlh1	mutL homolog 1 (E. coli)	DNA damage response, signal transduction resulting in induction of apoptosis; cell cycle; double-strand break repair via nonhomologous end joining; isotype switching; mismatch repair; oogenesis; pachytene; response to DNA damage stimulus; somatic hypermutation of immunoglobulin genes; spermatogenesis	rno03430:Mismatch repair; rno05200:Pathways in cancer; rno05210:Colorectal cancer; rno05213:Endometrial cancer	3
ENSRNOG00000034157	Cyp4f6	cytochrome P450, family 4, subfamily f, polypeptide 6	inflammatory response; leukotriene metabolic process; oxidation reduction	rno00590:Arachidonic acid metabolism	3
ENSRNOG00000036607	RGD1311595	similar to KIAA2026 protein			3
ENSRNOG00000036674	Cd7	Cd7 molecule	homeostasis of number of cells within a tissue	rno04640:Hematopoietic cell lineage	3
ENSRNOG00000036693	Slc25a10	solute carrier family 25 (mitochondrial carrier; dicarboxylate transporter), member 10	mitochondrial transport; phosphate transport; sulfate transport; transmembrane transport; transport		3
ENSRNOG00000036812	NDRG3_RAT	N-myc downstream regulated gene 3			3
ENSRNOG00000037243	Taz	tafazzin	metabolic process		3
ENSRNOG00000037245	Gdi1	GDP dissociation inhibitor 1	protein transport; regulation of GTPase activity; small GTPase mediated signal transduction		3
ENSRNOG00000037426	Gtpbp6	GTP binding protein 6 (putative)			3
ENSRNOG00000037446	Pxmp2	peroxisomal membrane protein 2			3
ENSRNOG00000037483	Ep400	E1A binding protein p400	histone H2A acetylation; histone H4 acetylation		3
ENSRNOG00000037566	RGD1560398	RGD1560398			3
ENSRNOG00000037946	Zfp108	rCG54479-like	intracellular signaling cascade		3
ENSRNOG00000038319	Akr1c19	aldo-keto reductase family 1, member C19	oxidation reduction		3
ENSRNOG00000038597	Dlg1	discs, large homolog 1 (Drosophila)	T cell activation; actin filament organization; activation of protein kinase activity; branching involved in ureteric bud morphogenesis; cell-cell adhesion; cortical actin cytoskeleton organization; embryonic skeletal system morphogenesis; endothelial cell proliferation; lens development in camera-type eye; negative regulation of T cell proliferation; negative regulation of epithelial cell prolif…	rno04660:T cell receptor signaling pathway	3
ENSRNOG00000038951	Cox17	COX17 cytochrome c oxidase assembly homolog (S. cerevisiae)	brain development; copper ion transport; heart development	rno00190:Oxidative phosphorylation	3
ENSRNOG00000039024	Ccdc52	coiled-coil domain containing 52			3
ENSRNOG00000039551	Rdh14	retinol dehydrogenase 14 (all-trans/9-cis/11-cis)	metabolic process	rno00230:Purine metabolism; rno00240:Pyrimidine metabolism; rno00760:Nicotinate and nicotinamide metabolism	3
ENSRNOG00000042258	RGD1561157	RGD1561157			3
ENSRNOG00000042714	RGD1559459	similar to Expressed sequence AI788959	metabolic process		3
ENSRNOG00000043234	Klrd1	killer cell lectin-like receptor, subfamily D, member 1			3
ENSRNOG00000043374	RGD1566099	similar to novel protein			3
ENSRNOG00000043412	RGD1561102	similar to ribosomal protein S12	translation		3
ENSRNOG00000000028	Nde1	nudE nuclear distribution gene E homolog 1 (A. nidulans)	cell cycle; cell differentiation; cell division; cerebral cortex development; establishment of mitotic spindle orientation; forebrain development; mitosis; multicellular organismal development; nervous system development; neuroblast proliferation; neuron migration; vesicle transport along microtubule		4
ENSRNOG00000000157	Atg12	ATG12 autophagy related 12 homolog (S. cerevisiae)	autophagic vacuole formation; autophagy; modification-dependent protein catabolic process	rno04140:Regulation of autophagy; rno04622:RIG-I-like receptor signaling pathway	4
ENSRNOG00000000307	Mical1	microtubule associated monoxygenase, calponin and LIM domain containing 1	metabolic process; oxidation reduction		4
ENSRNOG00000000321	Cd24	CD24 molecule	T cell costimulation; apoptotic mitochondrial changes; cell differentiation; cell migration; cell surface receptor linked signal transduction; cell-cell signaling; cholesterol homeostasis; elevation of cytosolic calcium ion concentration; heterophilic cell adhesion; immune response; induction of apoptosis by extracellular signals; leukocyte adhesion; multicellular organismal development; negative…	rno04640:Hematopoietic cell lineage	4
ENSRNOG00000000341	Nid2	nidogen 2	bioluminescence; cell-matrix adhesion; protein-chromophore linkage		4
ENSRNOG00000000399	Kpna1	karyopherin alpha 1	intracellular protein transport; protein import into nucleus		4
ENSRNOG00000000465	Slc39a7	solute carrier family 39 (zinc transporter), member 7	metal ion transport; transmembrane transport		4
ENSRNOG00000000557	Sar1a	SAR1 homolog A (S. cerevisiae)	intracellular protein transport; small GTPase mediated signal transduction; vesicle-mediated transport		4
ENSRNOG00000000558	Ppa1	pyrophosphatase (inorganic) 1	phosphate metabolic process	rno00190:Oxidative phosphorylation	4
ENSRNOG00000000836	Ltb	lymphotoxin beta (TNF superfamily, member 3)	gene expression; immune response; lymph node development; positive regulation of interleukin-12 biosynthetic process; skin development	rno04060:Cytokine-cytokine receptor interaction	4
ENSRNOG00000001136	Pebp1	phosphatidylethanolamine binding protein 1	aging; brain development; eating behavior; negative regulation of MAPKKK cascade; negative regulation of protein amino acid phosphorylation; positive regulation of mitosis; regulation of the force of heart contraction; response to activity; response to cAMP; response to calcium ion; response to corticosterone stimulus; response to drug; response to electrical stimulus; response to ethanol; respon…		4
ENSRNOG00000001205	Agpat3	1-acylglycerol-3-phosphate O-acyltransferase 3	metabolic process	rno00561:Glycerolipid metabolism; rno00564:Glycerophospholipid metabolism; rno00565:Ether lipid metabolism	4
ENSRNOG00000001228	Pofut2	protein O-fucosyltransferase 2			4
ENSRNOG00000001383	Slc24a6	solute carrier family 24 (sodium/potassium/calcium exchanger), member 6	calcium ion transport; ion transport; response to stimulus; sodium ion transport; transmembrane transport		4
ENSRNOG00000001417	Plod3	procollagen-lysine, 2-oxoglutarate 5-dioxygenase 3	oxidation reduction	rno00310:Lysine degradation	4
ENSRNOG00000001427	Orai2	ORAI calcium release-activated calcium modulator 2			4
ENSRNOG00000001429	Q66HB0_RAT	similar to hypothetical protein DKFZp434K1815			4
ENSRNOG00000001606	Adamts5	ADAM metallopeptidase with thrombospondin type 1 motif, 5	proteolysis		4
ENSRNOG00000001704	Runx1	runt-related transcription factor 1	behavioral response to pain; central nervous system development; definitive hemopoiesis; embryonic hemopoiesis; in utero embryonic development; liver development; neuron development; positive regulation of angiogenesis; regulation of transcription; response to retinoic acid; skeletal system development	rno05200:Pathways in cancer; rno05220:Chronic myeloid leukemia; rno05221:Acute myeloid leukemia	4
ENSRNOG00000001907	B3gnt5	UDP-GlcNAc:betaGal beta-1,3-N-acetylglucosaminyltransferase 5	central nervous system development; multicellular organismal development; protein amino acid glycosylation	rno00601:Glycosphingolipid biosynthesis	4
ENSRNOG00000001930	Ccdc50	coiled-coil domain containing 50			4
ENSRNOG00000002013	Sidt1	SID1 transmembrane family, member 1			4
ENSRNOG00000002050	Igfbp7	insulin-like growth factor binding protein 7	cell adhesion; cellular response to hormone stimulus; embryo implantation; regulation of cell growth; regulation of steroid biosynthetic process; response to heat; response to organic cyclic substance; response to retinoic acid		4
ENSRNOG00000002052	Ccdc80	coiled-coil domain containing 80	extracellular matrix organization; positive regulation of cell-substrate adhesion		4
ENSRNOG00000002101	Paics	phosphoribosylaminoimidazole carboxylase, phosphoribosylaminoimidazole succinocarboxamide synthetase; multifunctional protein ADE2-like	purine nucleotide biosynthetic process	rno00230:Purine metabolism	4
ENSRNOG00000002128	Ppat	phosphoribosyl pyrophosphate amidotransferase	glutamine metabolic process; metabolic process; nucleoside metabolic process; purine nucleotide biosynthetic process	rno00230:Purine metabolism; rno00250:Alanine, aspartate and glutamate metabolism	4
ENSRNOG00000002164	Nmu	neuromedin U	eating behavior; gastric acid secretion; neuropeptide signaling pathway; positive regulation of hormone secretion; positive regulation of smooth muscle contraction; positive regulation of synaptic transmission; regulation of smooth muscle contraction; response to stress; sensory perception of pain		4
ENSRNOG00000002258	RGD1306105	transmembrane protein 150C			4
ENSRNOG00000002301	Uso1	USO1 homolog, vesicle docking protein (yeast)	intra-Golgi vesicle-mediated transport; intracellular protein transport; membrane fusion; transcytosis		4
ENSRNOG00000002353	RBGPR_RAT	RAB3 GTPase activating protein subunit 2	regulation of GTPase activity		4
ENSRNOG00000002389	Morf4l2	mortality factor 4 like 2	DNA repair; chromatin modification; positive regulation of transcription from RNA polymerase II promoter; regulation of growth; regulation of transcription; response to DNA damage stimulus		4
ENSRNOG00000002413	Gpc4	glypican 4			4
ENSRNOG00000002425	Pctp	phosphatidylcholine transfer protein	cholesterol metabolic process; phospholipid transport		4
ENSRNOG00000002428	Lpar4	lysophosphatidic acid receptor 4		rno04080:Neuroactive ligand-receptor interaction	4
ENSRNOG00000002449	Maged2	melanoma antigen, family D, 2			4
ENSRNOG00000002461	NID1_RAT	nidogen 1	bioluminescence; cell adhesion; cell-matrix adhesion; positive regulation of cell-substrate adhesion; protein-chromophore linkage		4
ENSRNOG00000002579	Parm1	prostate androgen-regulated mucin-like protein 1	apoptosis		4
ENSRNOG00000002746	Fstl1	follistatin-like 1			4
ENSRNOG00000002810	Gfpt2	glutamine-fructose-6-phosphate transaminase 2	carbohydrate biosynthetic process; carbohydrate metabolic process; glutamine metabolic process; metabolic process	rno00250:Alanine, aspartate and glutamate metabolism; rno00520:Amino sugar and nucleotide sugar metabolism	4
ENSRNOG00000002886	Myh10	myosin, heavy chain 10, non-muscle	actin cytoskeleton organization; adult heart development; axon guidance; brain development; cell proliferation; cellular component movement; cerebellar Purkinje cell layer development; exocytosis; in utero embryonic development; neuromuscular process controlling balance; neuron migration; neuron projection development; plasma membrane repair; regulation of cell shape; retina development in camera…	rno04530:Tight junction; rno04810:Regulation of actin cytoskeleton; rno05416:Viral myocarditis	4
ENSRNOG00000003018	Olfml2b	olfactomedin-like 2B	extracellular matrix organization		4
ENSRNOG00000003069	Cd38	CD38 molecule	elevation of cytosolic calcium ion concentration; female pregnancy; metabolic process; negative regulation of bone resorption; positive regulation of B cell proliferation; positive regulation of cell growth; positive regulation of insulin secretion; positive regulation of vasoconstriction; response to estradiol stimulus; response to hormone stimulus; response to hypoxia; response to interleukin-1…	rno00760:Nicotinate and nicotinamide metabolism; rno04020:Calcium signaling pathway; rno04640:Hematopoietic cell lineage	4
ENSRNOG00000003114	B4galt4	UDP-Gal:betaGlcNAc beta 1,4-galactosyltransferase, polypeptide 4	carbohydrate metabolic process	rno00533:Keratan sulfate biosynthesis; rno00601:Glycosphingolipid biosynthesis	4
ENSRNOG00000003120	Prelp	proline/arginine-rich end leucine-rich repeat protein	cell aging		4
ENSRNOG00000003136	Fcrla	Fc receptor-like A	cell differentiation		4
ENSRNOG00000003147	SQSTM_RAT	sequestosome 1	apoptosis; cell differentiation; immune response; positive regulation of protein amino acid phosphorylation; protein heterooligomerization		4
ENSRNOG00000003226	MPRIP_RAT	myosin phosphatase Rho interacting protein			4
ENSRNOG00000003235	Mgat4b	mannosyl (alpha-1,3-)-glycoprotein beta-1,4-N-acetylglucosaminyltransferase, isozyme B	carbohydrate metabolic process	rno00510:N-Glycan biosynthesis	4
ENSRNOG00000003248	Mpzl1	myelin protein zero-like 1		rno04514:Cell adhesion molecules (CAMs)	4
ENSRNOG00000003289	Lap3	leucine aminopeptidase 3	protein metabolic process; proteolysis	rno00330:Arginine and proline metabolism; rno00480:Glutathione metabolism	4
ENSRNOG00000003310	Tmem63a	transmembrane protein 63a			4
ENSRNOG00000003357	Col3a1	collagen, type III, alpha 1	blood vessel development; cell-matrix adhesion; collagen biosynthetic process; collagen fibril organization; fibril organization; gut development; heart development; integrin-mediated signaling pathway; negative regulation of immune response; peptide cross-linking; response to cytokine stimulus; response to radiation; signal transduction; skeletal system development; skin development; transformin…	rno04510:Focal adhesion; rno04512:ECM-receptor interaction	4
ENSRNOG00000003464	RGD1311422	similar to CG8841-PA	inner ear morphogenesis; inner ear receptor cell differentiation; sensory perception of sound		4
ENSRNOG00000003510	Fmo2	flavin containing monooxygenase 2	drug metabolic process; oxidation reduction; oxygen and reactive oxygen species metabolic process; toxin metabolic process; xenobiotic metabolic process	rno00982:Drug metabolism	4
ENSRNOG00000003592	Med28	mediator complex subunit 28	regulation of transcription		4
ENSRNOG00000003596	Itgb1bp2	integrin beta 1 binding protein 2			4
ENSRNOG00000003661	Hn1	hematological and neurological expressed 1			4
ENSRNOG00000003669	Myocd	myocardin	heart development; muscle cell differentiation; negative regulation of transcription from RNA polymerase II promoter; positive regulation of cell proliferation; positive regulation of transcription; positive regulation of transcription from RNA polymerase II promoter; regulation of transcription; regulation of transcription from RNA polymerase II promoter; vasculogenesis		4
ENSRNOG00000003736	Col5a2	collagen, type V, alpha 2	collagen fibril organization; ossification; signal transduction; skeletal system development; skin development	rno04510:Focal adhesion; rno04512:ECM-receptor interaction	4
ENSRNOG00000003737	Best2	bestrophin 2	membrane depolarization; sensory perception of smell		4
ENSRNOG00000003809	Sat1	spermidine/spermine N1-acetyl transferase 1	metabolic process; regulation of cell proliferation	rno00330:Arginine and proline metabolism	4
ENSRNOG00000003827	Wipi1	WD repeat domain, phosphoinositide interacting 1	autophagy		4
ENSRNOG00000003829	Ap3s1	adaptor-related protein complex 3, sigma 1 subunit	intracellular protein transport; protein transport; transport; vesicle-mediated transport	rno04142:Lysosome	4
ENSRNOG00000003858	Atp6ap2	ATPase, H+ transporting, lysosomal accessory protein 2	regulation of MAPKKK cascade		4
ENSRNOG00000003872	Slc40a1	solute carrier family 39 (iron-regulated transporter), member 1	ion transport; iron ion transport		4
ENSRNOG00000003873	Cpd	carboxypeptidase D	proteolysis		4
ENSRNOG00000003897	Col1a1	collagen, type I, alpha 1	blood vessel development; cartilage development involved in endochondral bone morphogenesis; collagen biosynthetic process; collagen fibril organization; embryonic skeletal system development; endochondral ossification; face morphogenesis; osteoblast differentiation; protein transport; response to cAMP; response to corticosteroid stimulus; response to hydrogen peroxide; response to inorganic subs…	rno04510:Focal adhesion; rno04512:ECM-receptor interaction	4
ENSRNOG00000003928	Tmco1	transmembrane and coiled-coil domains 1			4
ENSRNOG00000003929	Pcdh19	protocadherin 19	cell adhesion; homophilic cell adhesion		4
ENSRNOG00000003942	Asnsd1	asparagine synthetase domain containing 1			4
ENSRNOG00000003964	Nsmce2	non-SMC element 2, MMS21 homolog (S. cerevisiae)	DNA recombination; DNA repair; modification-dependent protein catabolic process; protein ubiquitination; response to DNA damage stimulus		4
ENSRNOG00000004201	Rims2	regulating synaptic membrane exocytosis 2	cAMP-mediated signaling; calcium ion-dependent exocytosis; exocytosis; insulin secretion; intracellular protein transport; neurotransmitter transport		4
ENSRNOG00000004332	Egfr	epidermal growth factor receptor	positive regulation of synaptic transmission, glutamatergic; activation of MAPKK activity; cell morphogenesis; cell surface receptor linked signal transduction; cell-cell adhesion; cerebral cortex cell migration; circadian rhythm; embryonic placenta development; epidermal growth factor receptor signaling pathway; hair follicle development; negative regulation of apoptosis; negative regulation of …	rno04010:MAPK signaling pathway; rno04012:ErbB signaling pathway; rno04020:Calcium signaling pathway; rno04060:Cytokine-cytokine receptor interaction; rno04144:Endocytosis; rno04320:Dorso-ventral axis formation; rno04510:Focal adhesion; rno04520:Adherens junction; rno04540:Gap junction; rno04810:Regulation of actin cytoskeleton; rno04912:GnRH signaling pathway; rno05200:Pathways in cancer; rno052…	4
ENSRNOG00000004414	F11r	F11 receptor		rno04514:Cell adhesion molecules (CAMs); rno04530:Tight junction; rno04670:Leukocyte transendothelial migration	4
ENSRNOG00000004481	Adss	adenylosuccinate synthase	purine nucleotide biosynthetic process	rno00230:Purine metabolism; rno00250:Alanine, aspartate and glutamate metabolism	4
ENSRNOG00000004494	LKHA4_RAT	leukotriene A4 hydrolase	leukotriene biosynthetic process; proteolysis	rno00590:Arachidonic acid metabolism	4
ENSRNOG00000004559	Tuba1a	tubulin, alpha 1A; "tubulin, alpha 1B"; similar to alpha tubulin	microtubule-based movement; microtubule-based process; protein polymerization	rno04540:Gap junction	4
ENSRNOG00000004602	Rnf145	ring finger protein 145			4
ENSRNOG00000004610	Lum	lumican			4
ENSRNOG00000004624	Rnd3	Rho family GTPase 3	intracellular protein transport; nucleocytoplasmic transport; protein transport; signal transduction; small GTPase mediated signal transduction		4
ENSRNOG00000004754	Q5M7U8_RAT	tandem C2 domains, nuclear			4
ENSRNOG00000005008	Angpt4	angiopoietin 4	signal transduction		4
ENSRNOG00000005133	Mapt	microtubule-associated protein tau	apoptosis; microtubule cytoskeleton organization; microtubule-based process; negative regulation of microtubule depolymerization; neuron differentiation; positive regulation of axon extension; positive regulation of microtubule polymerization; response to nutrient; response to organic substance	rno04010:MAPK signaling pathway; rno05010:Alzheimer's disease	4
ENSRNOG00000005174	Tmem121	transmembrane protein 121			4
ENSRNOG00000005258	Myef2	myelin expression factor 2			4
ENSRNOG00000005284	Itpka	inositol 1,4,5-trisphosphate 3-kinase A		rno00562:Inositol phosphate metabolism; rno04020:Calcium signaling pathway; rno04070:Phosphatidylinositol signaling system	4
ENSRNOG00000005374	Lyar	Ly1 antibody reactive homolog (mouse)	oxidation reduction		4
ENSRNOG00000005464	Hspc159	galectin-related protein			4
ENSRNOG00000005465	Kcnmb1	potassium large conductance calcium-activated channel, subfamily M, beta member 1	ion transport; potassium ion transport; response to calcium ion	rno04270:Vascular smooth muscle contraction	4
ENSRNOG00000005580	Itgb4	integrin, beta 4	cell adhesion; cell communication; cell-matrix adhesion; filopodium assembly; integrin-mediated signaling pathway	rno04510:Focal adhesion; rno04512:ECM-receptor interaction; rno04810:Regulation of actin cytoskeleton; rno05410:Hypertrophic cardiomyopathy (HCM); rno05412:Arrhythmogenic right ventricular cardiomyopathy (ARVC); rno05414:Dilated cardiomyopathy	4
ENSRNOG00000005600	Nr4a2	nuclear receptor subfamily 4, group A, member 2	adult locomotory behavior; cellular response to extracellular stimulus; central nervous system neuron differentiation; central nervous system projection neuron axonogenesis; death; dopamine biosynthetic process; negative regulation of neuron apoptosis; nervous system development; neuron maturation; neuron migration; positive regulation of catalytic activity; positive regulation of transcription f…		4
ENSRNOG00000005619	RGD1310262	hypothetical LOC304650			4
ENSRNOG00000005679	Q8R492_RAT	fibroblast activation protein, alpha	endothelial cell migration; proteolysis		4
ENSRNOG00000005687	Slc6a14	solute carrier family 6 (amino acid transporter), member 14	neurotransmitter transport; response to toxin		4
ENSRNOG00000005823	Utp20	UTP20, small subunit (SSU) processome component, homolog (yeast)			4
ENSRNOG00000005890	PAIRB_RAT	Serpine1 mRNA binding protein 1	regulation of anti-apoptosis		4
ENSRNOG00000005930	Nnmt	nicotinamide N-methyltransferase		rno00760:Nicotinate and nicotinamide metabolism	4
ENSRNOG00000005965	Irak4	interleukin-1 receptor-associated kinase 4	cytokine production; cytokine-mediated signaling pathway; protein amino acid phosphorylation; signal transduction	rno04210:Apoptosis; rno04620:Toll-like receptor signaling pathway; rno04722:Neurotrophin signaling pathway	4
ENSRNOG00000006148	RGD1310352	similar to HTGN29 protein; keratinocytes associated transmembrane protein 2			4
ENSRNOG00000006206	Tmem106b	transmembrane protein 106B			4
ENSRNOG00000006247	Copa	coatomer protein complex subunit alpha	intracellular protein transport; protein folding; vesicle-mediated transport		4
ENSRNOG00000006358	Itgb1bp1	integrin beta 1 binding protein 1	cell-matrix adhesion; integrin-mediated signaling pathway		4
ENSRNOG00000006367	Slc5a8	solute carrier family 5 (iodide transporter), member 8	transmembrane transport; transport		4
ENSRNOG00000006411	Cav2	caveolin 2; caveolin 2-like	endoplasmic reticulum organization; mitochondrion organization; negative regulation of endothelial cell proliferation; protein oligomerization; regulation of mitosis; skeletal muscle fiber development; synaptic transmission; vesicle fusion	rno04510:Focal adhesion	4
ENSRNOG00000006420	Rbm38	RNA binding motif protein 38	regulation of RNA splicing		4
ENSRNOG00000006514	Vezt	vezatin, adherens junctions transmembrane protein			4
ENSRNOG00000006570	Plekhg3	pleckstrin homology domain containing, family G (with RhoGef domain) member 3	regulation of Rho protein signal transduction		4
ENSRNOG00000006690	Tmem168	transmembrane protein 168			4
ENSRNOG00000006720	Rnpep	arginyl aminopeptidase (aminopeptidase B)	leukotriene biosynthetic process; protein processing; proteolysis		4
ENSRNOG00000006753	Tgm3	transglutaminase 3, E polypeptide	peptide cross-linking; protein tetramerization		4
ENSRNOG00000006777	Mboat2	membrane bound O-acyltransferase domain containing 2	phospholipid biosynthetic process		4
ENSRNOG00000006795	RGD1308874	similar to RIKEN cDNA 2310001A20	biosynthetic process		4
ENSRNOG00000006855	Padi4	peptidyl arginine deiminase, type IV	chromatin modification; peptidyl-citrulline biosynthetic process from peptidyl-arginine; protein modification process; regulation of transcription		4
ENSRNOG00000006950	Padi3	peptidyl arginine deiminase, type III	peptidyl-citrulline biosynthetic process from peptidyl-arginine; protein modification process		4
ENSRNOG00000006963	Ctse	cathepsin E	antigen processing and presentation of exogenous peptide antigen via MHC class II; proteolysis	rno04142:Lysosome	4
ENSRNOG00000006987	RGD1563325	similar to hypothetical protein MGC17943			4
ENSRNOG00000007051	Rraga	Ras-related GTP binding A	apoptosis; cell death; protein transport; small GTPase mediated signal transduction		4
ENSRNOG00000007067	Padi1	peptidyl arginine deiminase, type I	peptidyl-citrulline biosynthetic process from peptidyl-arginine; protein modification process		4
ENSRNOG00000007213	Yars	tyrosyl-tRNA synthetase	tRNA aminoacylation for protein translation; translation	rno00970:Aminoacyl-tRNA biosynthesis	4
ENSRNOG00000007281	Flnc	filamin C, gamma		rno04010:MAPK signaling pathway; rno04510:Focal adhesion	4
ENSRNOG00000007320	Fam3d	family with sequence similarity 3, member D	negative regulation of insulin secretion		4
ENSRNOG00000007349	Ascc2	activating signal cointegrator 1 complex subunit 2			4
ENSRNOG00000007351	Ggh	gamma-glutamyl hydrolase (conjugase, folylpolygammaglutamyl hydrolase)	glutamine metabolic process; response to drug; response to ethanol; response to insulin stimulus; response to zinc ion	rno00790:Folate biosynthesis	4
ENSRNOG00000007415	Ptgs1	prostaglandin-endoperoxide synthase 1	aging; fatty acid biosynthetic process; oxidation reduction; positive regulation of smooth muscle contraction; positive regulation of vasoconstriction; prostaglandin biosynthetic process; regulation of blood pressure; regulation of cell proliferation; response to corticosterone stimulus; response to organic nitrogen; response to oxidative stress	rno00590:Arachidonic acid metabolism	4
ENSRNOG00000007623	Clec2d	C-type lectin domain family 2, member d			4
ENSRNOG00000007688	Sms	spermine synthase		rno00270:Cysteine and methionine metabolism; rno00330:Arginine and proline metabolism; rno00410:beta-Alanine metabolism; rno00480:Glutathione metabolism	4
ENSRNOG00000007701	Thoc7	THO complex 7 homolog (Drosophila)	intronless viral mRNA export from host nucleus		4
ENSRNOG00000007756	RGD1359310	similar to RIKEN cDNA 9430023L20	autophagic vacuole formation; autophagy		4
ENSRNOG00000008016	Ckap4	cytoskeleton-associated protein 4			4
ENSRNOG00000008035	Cinp	cyclin-dependent kinase 2-interacting protein			4
ENSRNOG00000008099	Galnt12	UDP-N-acetyl-alpha-D-galactosamine:polypeptide N-acetylgalactosaminyltransferase 12 (GalNAc-T12)		rno00512:O-Glycan biosynthesis	4
ENSRNOG00000008133	Mfng	MFNG O-fucosylpeptide 3-beta-N-acetylglucosaminyltransferase	pattern specification process	rno04330:Notch signaling pathway	4
ENSRNOG00000008161	Pdzk1ip1	PDZK1 interacting protein 1			4
ENSRNOG00000008205	Wdr68	DDB1 and CUL4 associated factor 7			4
ENSRNOG00000008245	Ptgis	prostaglandin I2 (prostacyclin) synthase	fatty acid biosynthetic process; prostaglandin biosynthetic process	rno00590:Arachidonic acid metabolism	4
ENSRNOG00000008320	Lypla1	lysophospholipase 1	fatty acid metabolic process; lipid metabolic process	rno00564:Glycerophospholipid metabolism	4
ENSRNOG00000008421	Klhl5	kelch-like 5 (Drosophila)	biological_process		4
ENSRNOG00000008422	Lpo	lactoperoxidase	oxidation reduction; response to oxidative stress		4
ENSRNOG00000008451	Fut8	fucosyltransferase 8 (alpha (1,6) fucosyltransferase)	cell migration; integrin-mediated signaling pathway; respiratory gaseous exchange; transforming growth factor beta receptor signaling pathway	rno00510:N-Glycan biosynthesis; rno00533:Keratan sulfate biosynthesis	4
ENSRNOG00000008482	Rbms1	RNA binding motif, single stranded interacting protein 1	DNA replication		4
ENSRNOG00000008564	Tmem222	transmembrane protein 222			4
ENSRNOG00000008595	Ttc12	tetratricopeptide repeat domain 12			4
ENSRNOG00000008600	Sytl1	synaptotagmin-like 1	ATP synthesis coupled proton transport; exocytosis; intracellular protein transport		4
ENSRNOG00000008659	Arhgap21	Rho GTPase activating protein 21	signal transduction		4
ENSRNOG00000008697	Nov	nephroblastoma overexpressed gene	regulation of cell growth		4
ENSRNOG00000008733	Lsm3	LSM3 homolog, U6 small nuclear RNA associated (S. cerevisiae)		rno03018:RNA degradation; rno03040:Spliceosome	4
ENSRNOG00000008738	Tp53i11	tumor protein p53 inducible protein 11			4
ENSRNOG00000008741	RGD1310950	calmodulin regulated spectrin-associated protein 1-like 1			4
ENSRNOG00000008749	Col5a1	collagen, type V, alpha 1	wound healing, spreading of epidermal cells; blood vessel development; cell adhesion; collagen biosynthetic process; collagen fibril organization; fibril organization; heart morphogenesis; signal transduction; skin development	rno04510:Focal adhesion; rno04512:ECM-receptor interaction	4
ENSRNOG00000008758	Tspan18	tetraspanin 18			4
ENSRNOG00000008945	Nans	N-acetylneuraminic acid synthase	carbohydrate biosynthetic process; metabolic process	rno00520:Amino sugar and nucleotide sugar metabolism	4
ENSRNOG00000009037	Sulf1	sulfatase 1	metabolic process		4
ENSRNOG00000009076	Ttpal	tocopherol (alpha) transfer protein-like			4
ENSRNOG00000009102	Fermt2	fermitin family homolog 2 (Drosophila)			4
ENSRNOG00000009113	Marcksl1	MARCKS-like 1; MARCKS-related protein-like	positive regulation of cell proliferation; vesicle-mediated transport	rno04666:Fc gamma R-mediated phagocytosis	4
ENSRNOG00000009227	Aplnr	apelin receptor	signal transduction	rno04080:Neuroactive ligand-receptor interaction	4
ENSRNOG00000009276	Schip1	schwannomin interacting protein 1	face morphogenesis; kidney development; nitrogen compound metabolic process; palate development; platelet-derived growth factor receptor signaling pathway; post-embryonic development; skeletal system morphogenesis; smooth muscle tissue development		4
ENSRNOG00000009325	Fuca1	fucosidase, alpha-L- 1, tissue	carbohydrate metabolic process; metabolic process	rno00511:Other glycan degradation; rno04142:Lysosome	4
ENSRNOG00000009572	Hgfac	hepatocyte growth factor activator	proteolysis		4
ENSRNOG00000009681	Flot2	flotillin 2	cell adhesion	rno04910:Insulin signaling pathway	4
ENSRNOG00000009760	Palm	paralemmin	cytoskeleton organization; negative regulation of adenylate cyclase activity; negative regulation of cAMP biosynthetic process; protein localization; regulation of cell shape		4
ENSRNOG00000009766	Q5XIJ2_RAT	G protein-coupled receptor 180			4
ENSRNOG00000009797	Aqp3	aquaporin 3	response to retinoic acid; transmembrane transport; transport; water transport		4
ENSRNOG00000009799	Dpagt1	dolichyl-phosphate (UDP-N-acetylglucosamine) N-acetylglucosaminephosphotransferase 1 (GlcNAc-1-P transferase)		rno00510:N-Glycan biosynthesis	4
ENSRNOG00000009884	Lgals1	lectin, galactoside-binding, soluble, 1	myoblast differentiation; positive regulation of I-kappaB kinase/NF-kappaB cascade		4
ENSRNOG00000009972	Rara	retinoic acid receptor, alpha	negative regulation of transcription; negative regulation of transcription from RNA polymerase II promoter; negative regulation of translational initiation; positive regulation of cell proliferation; positive regulation of transcription from RNA polymerase II promoter; regulation of anti-apoptosis; response to retinoic acid; spermatogenesis; ureteric bud development	rno05200:Pathways in cancer; rno05221:Acute myeloid leukemia	4
ENSRNOG00000009982	Np	nucleoside phosphorylase	nucleobase, nucleoside, nucleotide and nucleic acid metabolic process; nucleoside metabolic process	rno00230:Purine metabolism; rno00240:Pyrimidine metabolism; rno00760:Nicotinate and nicotinamide metabolism	4
ENSRNOG00000010029	Fam100b	family with sequence similarity 100, member B			4
ENSRNOG00000010076	Pkp1	plakophilin 1			4
ENSRNOG00000010107	LOC290704	mKIAA0992 protein-like; palladin			4
ENSRNOG00000010170	Tubb2c	tubulin, beta 2c; "tubulin, beta 4"	microtubule-based movement; microtubule-based process; protein polymerization	rno04540:Gap junction	4
ENSRNOG00000010265	Ada	adenosine deaminase	Peyer's patch development; aging; embryonic gut development; in utero embryonic development; liver development; lung alveolus development; negative regulation of apoptosis; negative regulation of inflammatory response; nucleotide metabolic process; placenta development; positive regulation of B cell proliferation; positive regulation of calcium-mediated signaling; positive regulation of heart rat…	rno00230:Purine metabolism; rno05340:Primary immunodeficiency	4
ENSRNOG00000010375	Slc39a2	solute carrier family 39 (zinc transporter), member 2	metal ion transport; transmembrane transport; zinc ion transport		4
ENSRNOG00000010389	Ndrg2	N-myc downstream regulated gene 2	cell differentiation; multicellular organismal development; nervous system development; signal transduction		4
ENSRNOG00000010466	RGD1306404	similar to mKIAA1402 protein		rno00532:Chondroitin sulfate biosynthesis	4
ENSRNOG00000010473	Cand2	cullin-associated and neddylation-dissociated 2 (putative)	methylation; modification-dependent protein catabolic process; regulation of transcription		4
ENSRNOG00000010527	Serpina3n	serine (or cysteine) peptidase inhibitor, clade A, member 3N	inflammatory response; response to cytokine stimulus; response to peptide hormone stimulus		4
ENSRNOG00000010529	Thbs2	thrombospondin 2	cell adhesion	rno04350:TGF-beta signaling pathway; rno04510:Focal adhesion; rno04512:ECM-receptor interaction	4
ENSRNOG00000010537	Dis3l	DIS3 mitotic control homolog (S. cerevisiae)-like			4
ENSRNOG00000010584	Tmem123	transmembrane protein 123			4
ENSRNOG00000010624	Ap3b1	adaptor-related protein complex 3, beta 1 subunit	antigen processing and presentation; blood coagulation; endocytosis; intracellular protein transport; protein transport; vesicle-mediated transport	rno04142:Lysosome	4
ENSRNOG00000010688	Nrgn	neurogranin			4
ENSRNOG00000010694	Tpbg	trophoblast glycoprotein			4
ENSRNOG00000010747	Dap	death-associated protein	apoptosis		4
ENSRNOG00000010774	Scamp1	secretory carrier membrane protein 1	endocytosis; exocytosis; protein transport		4
ENSRNOG00000010794	Dennd3	DENN/MADD domain containing 3			4
ENSRNOG00000010819	Hspa4l	heat shock protein 4-like	response to stress		4
ENSRNOG00000011029	Sec11a	SEC11 homolog A (S. cerevisiae)	proteolysis; signal peptide processing		4
ENSRNOG00000011060	Unc119	UNC-119 homolog (C. elegans)	response to stimulus; visual perception		4
ENSRNOG00000011164	Coq6	coenzyme Q6 homolog, monooxygenase (S. cerevisiae)	oxidation reduction; ubiquinone biosynthetic process	rno00130:Ubiquinone and other terpenoid-quinone biosynthesis	4
ENSRNOG00000011175	Hnrnpa2b1	heterogeneous nuclear ribonucleoprotein A2/B1	RNA splicing; mRNA processing		4
ENSRNOG00000011292	Col1a2	collagen, type I, alpha 2	Rho protein signal transduction; blood vessel development; collagen fibril organization; regulation of blood pressure; signal transduction; skeletal system development; skin morphogenesis; transforming growth factor beta receptor signaling pathway	rno04510:Focal adhesion; rno04512:ECM-receptor interaction	4
ENSRNOG00000011329	Pkm2	pyruvate kinase, muscle; M2 pyruvate kinase-like; similar to pyruvate kinase (EC 2.7.1.40) isozyme M2 - rat	ATP biosynthetic process; glucose metabolic process; glycolysis; liver development; organ regeneration; pyruvate biosynthetic process; response to gravity; response to hypoxia; response to insulin stimulus; response to nutrient; response to organic substance; skeletal muscle tissue regeneration	rno00010:Glycolysis / Gluconeogenesis; rno00230:Purine metabolism; rno00620:Pyruvate metabolism; rno04930:Type II diabetes mellitus	4
ENSRNOG00000011363	Napepld	N-acyl phosphatidylethanolamine phospholipase D	lipid metabolic process; phospholipid catabolic process		4
ENSRNOG00000011366	Pigs	phosphatidylinositol glycan anchor biosynthesis, class S	GPI anchor biosynthetic process	rno00563:Glycosylphosphatidylinositol(GPI)-anchor biosynthesis	4
ENSRNOG00000011409	Hebp2	heme binding protein 2			4
ENSRNOG00000011416	Vegfc	vascular endothelial growth factor C	cell differentiation; morphogenesis of embryonic epithelium; multicellular organismal development; organ morphogenesis; positive regulation of blood vessel endothelial cell migration; positive regulation of cell division; positive regulation of epithelial cell proliferation; positive regulation of neuroblast proliferation; positive regulation of protein secretion; regulation of angiogenesis; vasc…	rno04060:Cytokine-cytokine receptor interaction; rno04150:mTOR signaling pathway; rno04510:Focal adhesion; rno05200:Pathways in cancer; rno05211:Renal cell carcinoma; rno05212:Pancreatic cancer; rno05219:Bladder cancer	4
ENSRNOG00000011425	Ptpn3	protein tyrosine phosphatase, non-receptor type 3	dephosphorylation; protein amino acid dephosphorylation		4
ENSRNOG00000011441	Tpd52	tumor protein D52	B cell differentiation; proteolysis		4
ENSRNOG00000011501	Atp1b3	ATPase, Na+/K+ transporting, beta 3 polypeptide	ATP biosynthetic process; ion transport; potassium ion transport; sodium ion transport	rno04260:Cardiac muscle contraction; rno04960:Aldosterone-regulated sodium reabsorption	4
ENSRNOG00000011504	Akap2	A kinase (PRKA) anchor protein 2	actin filament organization; protein heterooligomerization; protein localization		4
ENSRNOG00000011582	Rab3d	RAB3D, member RAS oncogene family	intracellular protein transport; nucleocytoplasmic transport; protein transport; regulation of exocytosis; signal transduction; small GTPase mediated signal transduction		4
ENSRNOG00000011598	S15A1_RAT	solute carrier family 15 (oligopeptide transporter), member 1	oligopeptide transport; protein transport		4
ENSRNOG00000011661	Hnrnph2	heterogeneous nuclear ribonucleoprotein H2 (H')			4
ENSRNOG00000011863	Gins3	GINS complex subunit 3 (Psf3 homolog)			4
ENSRNOG00000011891	Atp6v1b2	ATPase, H transporting, lysosomal V1 subunit B2	ATP metabolic process; ATP synthesis coupled proton transport; ion transport; proton transport; regulation of cellular pH	rno00190:Oxidative phosphorylation	4
ENSRNOG00000012000	Copb1	coatomer protein complex, subunit beta 1	retrograde vesicle-mediated transport, Golgi to ER; intra-Golgi vesicle-mediated transport; intracellular protein transport; vesicle-mediated transport		4
ENSRNOG00000012015	Lrrc49	leucine rich repeat containing 49			4
ENSRNOG00000012016	B2RYH4_RAT	Cdig2 protein	bile acid metabolic process; cholesterol efflux; cholesterol transport; endocytosis; response to cadmium ion		4
ENSRNOG00000012046	Prmt5	protein arginine methyltransferase 5			4
ENSRNOG00000012053	S100a16	S100 calcium binding protein A16	response to calcium ion		4
ENSRNOG00000012080	Itga1	integrin, alpha 1	activation of MAPK activity; cell adhesion; cell chemotaxis; integrin-mediated signaling pathway; neuron projection morphogenesis; neutrophil chemotaxis; positive regulation of neuron apoptosis; vasodilation	rno04510:Focal adhesion; rno04512:ECM-receptor interaction; rno04640:Hematopoietic cell lineage; rno04810:Regulation of actin cytoskeleton; rno05410:Hypertrophic cardiomyopathy (HCM); rno05412:Arrhythmogenic right ventricular cardiomyopathy (ARVC); rno05414:Dilated cardiomyopathy	4
ENSRNOG00000012081	Txn1	thioredoxin 1	cell redox homeostasis; electron transport chain; negative regulation of transcription from RNA polymerase II promoter; transport		4
ENSRNOG00000012237	Q5WQV5_RAT	radixin	apical protein localization; cytoskeleton organization	rno04810:Regulation of actin cytoskeleton	4
ENSRNOG00000012346	Epb4.1l2	erythrocyte membrane protein band 4.1-like 2	cortical actin cytoskeleton organization	rno04530:Tight junction	4
ENSRNOG00000012383	Ndufc2	NADH dehydrogenase (ubiquinone) 1, subcomplex unknown, 2	mitochondrial electron transport, NADH to ubiquinone	rno00190:Oxidative phosphorylation; rno05010:Alzheimer's disease; rno05012:Parkinson's disease; rno05016:Huntington's disease	4
ENSRNOG00000012464	ADH1_RAT	alcohol dehydrogenase 1 (class I)	behavioral response to ethanol; metabolic process; oxidation reduction; response to retinoic acid; response to testosterone stimulus; retinoic acid metabolic process; retinol metabolic process	rno00010:Glycolysis / Gluconeogenesis; rno00071:Fatty acid metabolism; rno00350:Tyrosine metabolism; rno00830:Retinol metabolism; rno00980:Metabolism of xenobiotics by cytochrome P450; rno00982:Drug metabolism	4
ENSRNOG00000012471	Thbs4	thrombospondin 4	cell adhesion; nervous system development; neuron projection morphogenesis; protein homooligomerization	rno04350:TGF-beta signaling pathway; rno04510:Focal adhesion; rno04512:ECM-receptor interaction	4
ENSRNOG00000012476	Reps1	RALBP1 associated Eps domain containing 1			4
ENSRNOG00000012549	Hs2st1	heparan sulfate 2-O-sulfotransferase 1	carbohydrate biosynthetic process	rno00534:Heparan sulfate biosynthesis	4
ENSRNOG00000012623	Arf4	ADP-ribosylation factor 4	epidermal growth factor receptor signaling pathway; intracellular protein transport; protein transport; small GTPase mediated signal transduction; vesicle-mediated transport		4
ENSRNOG00000012630	Rhoc	ras homolog gene family, member A; "ras homolog gene family, member C"	actin cytoskeleton organization; intracellular protein transport; negative regulation of I-kappaB kinase/NF-kappaB cascade; negative regulation of calcium ion transport via voltage-gated calcium channel activity; negative regulation of neuron differentiation; neuron projection morphogenesis; nucleocytoplasmic transport; positive regulation of I-kappaB kinase/NF-kappaB cascade; positive regulation…	rno04062:Chemokine signaling pathway; rno04270:Vascular smooth muscle contraction; rno04310:Wnt signaling pathway; rno04350:TGF-beta signaling pathway; rno04360:Axon guidance; rno04510:Focal adhesion; rno04520:Adherens junction; rno04530:Tight junction; rno04660:T cell receptor signaling pathway; rno04670:Leukocyte transendothelial migration; rno04722:Neurotrophin signaling pathway; rno04810:Regu…	4
ENSRNOG00000012744	RGD1309350	similar to transthyretin (4L369)			4
ENSRNOG00000012787	Tmem164	transmembrane protein 164			4
ENSRNOG00000012840	Sparc	secreted protein, acidic, cysteine-rich (osteonectin)	heart development; inner ear development; lung development; ossification; regulation of cell proliferation; response to L-ascorbic acid; response to cAMP; response to cadmium ion; response to calcium ion; response to cytokine stimulus; response to ethanol; response to glucocorticoid stimulus; response to gravity; response to lead ion; response to lipopolysaccharide; response to peptide hormone st…		4
ENSRNOG00000012852	Bin1	bridging integrator 1	multicellular organismal development; muscle cell differentiation; regulation of endocytosis; synaptic vesicle endocytosis		4
ENSRNOG00000012892	Abca4	ATP-binding cassette, subfamily A (ABC1), member 4	photoreceptor cell maintenance; transport	rno02010:ABC transporters	4
ENSRNOG00000012906	Bcas1	breast carcinoma amplified sequence 1			4
ENSRNOG00000012975	Ggcx	gamma-glutamyl carboxylase			4
ENSRNOG00000013014	Cyba	cytochrome b-245, alpha polypeptide	electron transport chain; hydrogen peroxide biosynthetic process; inflammatory response; innate immune response; regulation of blood pressure; respiratory burst; superoxide anion generation; transport	rno04670:Leukocyte transendothelial migration	4
ENSRNOG00000013061	Tusc3	tumor suppressor candidate 3	cell redox homeostasis	rno00510:N-Glycan biosynthesis	4
ENSRNOG00000013102	Entpd2	ectonucleoside triphosphate diphosphohydrolase 2	platelet activation	rno00230:Purine metabolism	4
ENSRNOG00000013183	Eif4e	eukaryotic translation initiation factor 4E	regulation of translation; translational initiation	rno04150:mTOR signaling pathway; rno04910:Insulin signaling pathway	4
ENSRNOG00000013252	Sdccag10	serologically defined colon cancer antigen 10	protein folding		4
ENSRNOG00000013279	Scd	stearoyl-CoA desaturase (delta-9-desaturase)	fatty acid biosynthetic process; lipid metabolic process; myelination; oxidation reduction	rno01040:Biosynthesis of unsaturated fatty acids; rno03320:PPAR signaling pathway	4
ENSRNOG00000013286	Pdcl3	phosducin-like 3	apoptosis		4
ENSRNOG00000013381	TS101_RAT	tumor susceptibility gene 101	negative regulation of transcription, DNA-dependent; cell cycle; cell cycle arrest; cell differentiation; cell division; keratinocyte differentiation; negative regulation of cell proliferation; post-translational protein modification; protein modification process; protein transport; regulation of cell growth; regulation of protein metabolic process	rno04144:Endocytosis	4
ENSRNOG00000013388	Pgap1	post-GPI attachment to proteins 1	GPI anchor biosynthetic process; anterior/posterior axis specification; embryonic pattern specification; intracellular protein transport; sensory perception of sound	rno00563:Glycosylphosphatidylinositol(GPI)-anchor biosynthesis	4
ENSRNOG00000013552	Scd1	stearoyl-Coenzyme A desaturase 1	brown fat cell differentiation; fatty acid biosynthetic process; lipid metabolic process; oxidation reduction; white fat cell differentiation	rno01040:Biosynthesis of unsaturated fatty acids; rno03320:PPAR signaling pathway	4
ENSRNOG00000013618	Q4G039_RAT	ankyrin repeat domain 10			4
ENSRNOG00000013653	Pdlim7	PDZ and LIM domain 7	actin cytoskeleton organization; cell differentiation; multicellular organismal development; ossification; positive regulation of osteoblast differentiation		4
ENSRNOG00000013660	Cog6	component of oligomeric golgi complex 6	protein transport		4
ENSRNOG00000013791	Enpp3	ectonucleotide pyrophosphatase/phosphodiesterase 3	immune response; metabolic process; phosphate metabolic process	rno00230:Purine metabolism; rno00500:Starch and sucrose metabolism; rno00740:Riboflavin metabolism; rno00760:Nicotinate and nicotinamide metabolism; rno00770:Pantothenate and CoA biosynthesis	4
ENSRNOG00000013816	Cmas	cytidine monophosphate N-acetylneuraminic acid synthetase	lipopolysaccharide biosynthetic process	rno00520:Amino sugar and nucleotide sugar metabolism	4
ENSRNOG00000013836	RHG17_RAT	Rho GTPase activating protein 17	actin filament organization; calcium ion-dependent exocytosis; signal transduction		4
ENSRNOG00000014013	Map4k4	mitogen-activated protein kinase kinase kinase kinase 4	protein amino acid phosphorylation	rno04010:MAPK signaling pathway	4
ENSRNOG00000014029	Klhl13<sup>Tn(sb-T2/Bart3)2.176Mcwi</sup>	kelch-like 13 (Drosophila)		rno04120:Ubiquitin mediated proteolysis	4
ENSRNOG00000014171	Q5PQL1_RAT	tumor necrosis factor (ligand) superfamily, member 13	cell death; immune response; immunoglobulin mediated immune response; positive regulation of cell proliferation; regulation of immune response	rno04060:Cytokine-cytokine receptor interaction; rno04672:Intestinal immune network for IgA production	4
ENSRNOG00000014288	Fn1	fibronectin 1	acute-phase response; angiogenesis; anti-apoptosis; cell adhesion; cell-matrix adhesion; cell-substrate junction assembly; extracellular matrix organization; metabolic process; ossification; oxidation reduction; regulation of cell shape; wound healing	rno04510:Focal adhesion; rno04512:ECM-receptor interaction; rno04810:Regulation of actin cytoskeleton; rno05200:Pathways in cancer; rno05222:Small cell lung cancer	4
ENSRNOG00000014357	Gja4	gap junction protein, alpha 4	blood vessel development; calcium ion transport; cell communication; cell-cell signaling; response to pain		4
ENSRNOG00000014405	Aprt	adenine phosphoribosyl transferase	grooming behavior; lactation; nucleoside metabolic process	rno00230:Purine metabolism	4
ENSRNOG00000014419	Brd7	bromodomain containing 7			4
ENSRNOG00000014422	Gtf2e2	general transcription factor IIE, polypeptide 2, beta	transcription initiation from RNA polymerase II promoter	rno03022:Basal transcription factors	4
ENSRNOG00000014426	Lox	lysyl oxidase	blood vessel development; collagen fibril organization; lung development; oxidation reduction; response to drug; response to steroid hormone stimulus; wound healing		4
ENSRNOG00000014453	Anxa5	annexin A5	protein homooligomerization; response to organic substance		4
ENSRNOG00000014479	Cttnbp2nl	CTTNBP2 N-terminal like			4
ENSRNOG00000014505	Pmfbp1	polyamine modulated factor 1 binding protein 1	cytoskeleton organization		4
ENSRNOG00000014511	Alg10b	asparagine-linked glycosylation 10, alpha-1,2-glucosyltransferase homolog (S. pombe)		rno00510:N-Glycan biosynthesis	4
ENSRNOG00000014532	Lbp	lipopolysaccharide binding protein	acute-phase response; defense response to Gram-negative bacterium; defense response to Gram-positive bacterium; innate immune response; lipid transport; lipopolysaccharide-mediated signaling pathway; negative regulation of tumor necrosis factor production; positive regulation of interleukin-6 production; positive regulation of interleukin-8 production; positive regulation of tumor necrosis factor…	rno04620:Toll-like receptor signaling pathway	4
ENSRNOG00000014578	Fxyd4	FXYD domain-containing ion transport regulator 4	ion transport	rno04960:Aldosterone-regulated sodium reabsorption	4
ENSRNOG00000014613	Ddah1	dimethylarginine dimethylaminohydrolase 1	positive regulation of angiogenesis; positive regulation of nitric oxide biosynthetic process	rno04660:T cell receptor signaling pathway; rno04662:B cell receptor signaling pathway	4
ENSRNOG00000014647	Cbfb	core-binding factor, beta subunit	cell maturation; definitive hemopoiesis; lymphocyte differentiation; myeloid cell differentiation; osteoblast differentiation; positive regulation of transcription from RNA polymerase II promoter		4
ENSRNOG00000014690	Pigt	phosphatidylinositol glycan anchor biosynthesis, class T	neuron apoptosis; neuron differentiation	rno00563:Glycosylphosphatidylinositol(GPI)-anchor biosynthesis	4
ENSRNOG00000014739	Wfdc2	WAP four-disulfide core domain 2			4
ENSRNOG00000014797	Tmbim1	transmembrane BAX inhibitor motif containing 1			4
ENSRNOG00000014816	Slc1a1	solute carrier family 1 (neuronal/epithelial high affinity glutamate transporter, system Xag), member 1	dicarboxylic acid transport; protein homooligomerization; transport		4
ENSRNOG00000014957	RGD1310571	similar to hypothetical protein			4
ENSRNOG00000015037	Vsig1	V-set and immunoglobulin domain containing 1			4
ENSRNOG00000015113	Mocos	molybdenum cofactor sulfurase	metabolic process		4
ENSRNOG00000015211	Sass6	spindle assembly 6 homolog (C. elegans)	centriole replication		4
ENSRNOG00000015217	Ltv1	LTV1 homolog (S. cerevisiae)			4
ENSRNOG00000015239	RGD1309759	similar to cDNA sequence BC013529			4
ENSRNOG00000015325	Pigf	similar to Phosphatidylinositol-glycan biosynthesis, class F protein (PIG-F)	GPI anchor biosynthetic process		4
ENSRNOG00000015329	Kpna2	karyopherin (importin) alpha 2; karyopherin alpha 2; karyopherin alpha 2-like	intracellular protein transport; protein import into nucleus		4
ENSRNOG00000015465	Cep72	centrosomal protein 72	protein amino acid phosphorylation		4
ENSRNOG00000015502	Hiat1	hippocampus abundant gene transcript 1	response to antibiotic; transmembrane transport; transport		4
ENSRNOG00000015551	Fuca2	fucosidase, alpha-L- 2, plasma	carbohydrate metabolic process; metabolic process	rno00511:Other glycan degradation	4
ENSRNOG00000015674	Acap1	ArfGAP with coiled-coil, ankyrin repeat and PH domains 1	regulation of ARF GTPase activity		4
ENSRNOG00000015777	Rkhd2	mex-3 homolog C (C. elegans)			4
ENSRNOG00000015794	Fam83d	family with sequence similarity 83, member D	tRNA aminoacylation for protein translation; translation		4
ENSRNOG00000015801	Spns2	spinster homolog 2	transmembrane transport		4
ENSRNOG00000015812	Tm4sf1	transmembrane 4 L six family member 1			4
ENSRNOG00000015902	Cpxm2	carboxypeptidase X (M14 family), member 2	cell adhesion; proteolysis		4
ENSRNOG00000015904	Wfdc1	WAP four-disulfide core domain 1	negative regulation of epithelial cell proliferation; regulation of cell growth; response to drug; response to estradiol stimulus		4
ENSRNOG00000015913	Tspan5	tetraspanin 5	cell adhesion; cell proliferation		4
ENSRNOG00000015941	Fkbp10	FK506 binding protein 10	protein folding		4
ENSRNOG00000015948	Slc1a5	solute carrier family 1 (neutral amino acid transporter), member 5	L-serine transport; dicarboxylic acid transport		4
ENSRNOG00000015982	Wnt11	wingless-type MMTV integration site family, member 11	Wnt receptor signaling pathway, calcium modulating pathway; multicellular organismal development	rno04310:Wnt signaling pathway; rno04340:Hedgehog signaling pathway; rno04916:Melanogenesis; rno05200:Pathways in cancer; rno05217:Basal cell carcinoma	4
ENSRNOG00000016012	SPS2L_RAT	spermatogenesis associated, serine-rich 2-like			4
ENSRNOG00000016031	Bicd2	bicaudal D homolog 2 (Drosophila)	microtubule-based movement; transport		4
ENSRNOG00000016058	Kazald1	Kazal-type serine peptidase inhibitor domain 1	extracellular matrix organization; regulation of cell growth		4
ENSRNOG00000016161	Lman2	lectin, mannose-binding 2			4
ENSRNOG00000016231	Polr2d	polymerase (RNA) II (DNA directed) polypeptide D	cellular metabolic process; transcription	rno00230:Purine metabolism; rno00240:Pyrimidine metabolism; rno03020:RNA polymerase; rno05016:Huntington's disease	4
ENSRNOG00000016234	Ciapin1	cytokine induced apoptosis inhibitor 1	anti-apoptosis; hemopoiesis		4
ENSRNOG00000016281	Col4a1	collagen, type IV, alpha 1	epithelial cell differentiation	rno04510:Focal adhesion; rno04512:ECM-receptor interaction; rno05200:Pathways in cancer; rno05222:Small cell lung cancer	4
ENSRNOG00000016321	Entpd4	ectonucleoside triphosphate diphosphohydrolase 4		rno00230:Purine metabolism; rno00240:Pyrimidine metabolism; rno04142:Lysosome	4
ENSRNOG00000016346	Prkcd	protein kinase C, delta	B cell proliferation; aging; cellular response to glucose starvation; cellular response to insulin stimulus; collagen metabolic process; immunoglobulin mediated immune response; induction of apoptosis; intracellular signaling cascade; positive regulation of MAP kinase activity; positive regulation of MAPKKK cascade; positive regulation of glucose import; protein amino acid autophosphorylation; pr…	rno04062:Chemokine signaling pathway; rno04270:Vascular smooth muscle contraction; rno04530:Tight junction; rno04664:Fc epsilon RI signaling pathway; rno04666:Fc gamma R-mediated phagocytosis; rno04722:Neurotrophin signaling pathway; rno04912:GnRH signaling pathway; rno04930:Type II diabetes mellitus	4
ENSRNOG00000016367	Vasp	vasodilator-stimulated phosphoprotein	actin cytoskeleton organization; axon guidance; neural tube closure	rno04510:Focal adhesion; rno04666:Fc gamma R-mediated phagocytosis; rno04670:Leukocyte transendothelial migration	4
ENSRNOG00000016416	Rnh1	ribonuclease inhibitor-like	regulation of angiogenesis		4
ENSRNOG00000016539	Q5BK70_RAT	RAB24, member RAS oncogene family	intracellular protein transport; nucleocytoplasmic transport; protein transport; signal transduction; small GTPase mediated signal transduction		4
ENSRNOG00000016550	Dclk2	doublecortin-like kinase 2	intracellular signaling cascade; protein amino acid phosphorylation		4
ENSRNOG00000016558	Pllp	plasma membrane proteolipid (plasmolipin)	ion transport; myelination; response to wounding		4
ENSRNOG00000016559	Tm2d2	TM2 domain containing 2			4
ENSRNOG00000016578	Papd1	mitochondrial poly(A) polymerase			4
ENSRNOG00000016595	Hhex	hematopoietically expressed homeobox	B cell differentiation; anterior/posterior pattern formation; cell cycle; cell differentiation; embryonic heart tube development; embryonic organ development; endoderm development; forebrain development; hemopoiesis; hepatocyte differentiation; interkinetic nuclear migration; liver development; mRNA export from nucleus; negative regulation of angiogenesis; negative regulation of gene-specific tra…	rno04950:Maturity onset diabetes of the young	4
ENSRNOG00000016704	Pcyox1	prenylcysteine oxidase 1	chloride transport; oxidation reduction		4
ENSRNOG00000016758	Loxl2	lysyl oxidase-like 2	oxidation reduction		4
ENSRNOG00000016810	Stmn1	similar to stathmin 1/oncoprotein 18); stathmin 1	cell differentiation; intracellular signaling cascade; microtubule depolymerization; multicellular organismal development; nervous system development	rno04010:MAPK signaling pathway	4
ENSRNOG00000016836	Casp7	caspase 7	aging; apoptosis; heart development; induction of apoptosis; proteolysis; release of cytochrome c from mitochondria; response to UV	rno04210:Apoptosis; rno05010:Alzheimer's disease	4
ENSRNOG00000016852	Apobec3f	apolipoprotein B mRNA editing enzyme, catalytic polypeptide-like 3F			4
ENSRNOG00000016866	Fhl2	four and a half LIM domains 2	heart trabecula formation; osteoblast differentiation; regulation of transcription; regulation of transcription from RNA polymerase II promoter; response to hormone stimulus; ventricular cardiac muscle cell development		4
ENSRNOG00000016924	Acly	ATP citrate lyase	cellular carbohydrate metabolic process; lipid biosynthetic process; metabolic process	rno00020:Citrate cycle (TCA cycle)	4
ENSRNOG00000016937	Fam54b	family with sequence similarity 54, member B			4
ENSRNOG00000017029	Snx1	sorting nexin 1	cell communication; endosome to lysosome transport; intracellular protein transport		4
ENSRNOG00000017077	Snx7	sorting nexin 7	cell communication		4
ENSRNOG00000017235	Atp6v0d1	ATPase, H+ transporting, lysosomal V0 subunit D1	ATP synthesis coupled proton transport; brain development	rno00190:Oxidative phosphorylation; rno04142:Lysosome	4
ENSRNOG00000017369	Mustn1	musculoskeletal, embryonic nuclear protein 1	embryonic limb morphogenesis; tissue regeneration		4
ENSRNOG00000017395	Duox2	dual oxidase 2	cytokine-mediated signaling pathway; hormone biosynthetic process; hydrogen peroxide catabolic process; oxidation reduction; response to cAMP; response to oxidative stress; thyroid hormone generation		4
ENSRNOG00000017445	Tubb2b	tubulin, beta 2b	microtubule-based movement; microtubule-based process; protein polymerization	rno04540:Gap junction	4
ENSRNOG00000017469	Anxa1	annexin A1	arachidonic acid secretion; cell cycle; cell surface receptor linked signal transduction; cellular response to hydrogen peroxide; endocrine pancreas development; estrous cycle phase; hepatocyte differentiation; insulin secretion; keratinocyte differentiation; negative regulation of apoptosis; peptide cross-linking; positive regulation of apoptosis; positive regulation of prostaglandin biosyntheti…		4
ENSRNOG00000017478	Pcsk7	proprotein convertase subtilisin/kexin type 7	proteolysis		4
ENSRNOG00000017536	Cdc16	cell division cycle 16 homolog (S. cerevisiae)	cell division; protein K11-linked ubiquitination	rno04110:Cell cycle; rno04114:Oocyte meiosis; rno04120:Ubiquitin mediated proteolysis; rno04914:Progesterone-mediated oocyte maturation	4
ENSRNOG00000017547	Ccl28	chemokine (C-C motif) ligand 28	elevation of cytosolic calcium ion concentration; immune response	rno04060:Cytokine-cytokine receptor interaction; rno04062:Chemokine signaling pathway; rno04672:Intestinal immune network for IgA production	4
ENSRNOG00000017581	RGD1306227	similar to 4833420G17Rik protein			4
ENSRNOG00000017684	Fbxl22	F-box and leucine-rich repeat protein 22			4
ENSRNOG00000017770	Cdc123	cell division cycle 123 homolog (S. cerevisiae)	G1 phase of mitotic cell cycle; cell cycle; cell division		4
ENSRNOG00000017794	Fuk	fucokinase	phosphorylation	rno00051:Fructose and mannose metabolism; rno00520:Amino sugar and nucleotide sugar metabolism	4
ENSRNOG00000017852	Nars	asparaginyl-tRNA synthetase	tRNA aminoacylation for protein translation; translation	rno00970:Aminoacyl-tRNA biosynthesis	4
ENSRNOG00000017901	Acy3	aspartoacylase (aminocyclase) 3	metabolic process	rno00250:Alanine, aspartate and glutamate metabolism; rno00340:Histidine metabolism	4
ENSRNOG00000017932	St3gal2	ST3 beta-galactoside alpha-2,3-sialyltransferase 2	protein amino acid glycosylation	rno00512:O-Glycan biosynthesis; rno00533:Keratan sulfate biosynthesis; rno00603:Glycosphingolipid biosynthesis; rno00604:Glycosphingolipid biosynthesis	4
ENSRNOG00000018107	Zfand5	zinc finger, AN1-type domain 5	face development; in utero embryonic development; platelet-derived growth factor receptor signaling pathway; respiratory system process; skeletal system morphogenesis; smooth muscle tissue development		4
ENSRNOG00000018184	Tpm1_v6	tropomyosin 1, alpha	actin filament capping; cardiac muscle contraction; embryonic development; in utero embryonic development; muscle contraction; muscle filament sliding; negative regulation of cell migration; positive regulation of ATPase activity; positive regulation of cell adhesion; positive regulation of stress fiber formation; ruffle organization; wound healing	rno04260:Cardiac muscle contraction; rno05410:Hypertrophic cardiomyopathy (HCM); rno05414:Dilated cardiomyopathy	4
ENSRNOG00000018266	Slc23a3	solute carrier family 23 (nucleobase transporters), member 3	transmembrane transport; transport		4
ENSRNOG00000018267	B3gnt7	UDP-GlcNAc:betaGal beta-1,3-N-acetylglucosaminyltransferase 7; "UDP-GlcNAc:betaGal beta-1,3-N-acetylglucosaminyltransferase 7-like"	protein amino acid glycosylation	rno00533:Keratan sulfate biosynthesis	4
ENSRNOG00000018273	Ncl	nucleolin			4
ENSRNOG00000018289	RGD1560648	Parkinson disease (autosomal recessive, early onset) 7	adult locomotory behavior; membrane depolarization; response to drug; response to hydrogen peroxide; response to oxidative stress	rno05012:Parkinson's disease	4
ENSRNOG00000018309	Chd4	chromodomain helicase DNA binding protein 4	chromatin assembly or disassembly; intracellular signaling cascade; regulation of transcription		4
ENSRNOG00000018371	Tubb6	tubulin, beta 6	microtubule-based movement; microtubule-based process; protein polymerization	rno04540:Gap junction	4
ENSRNOG00000018400	LOC680692	similar to Golgi phosphoprotein 2 (Golgi membrane protein GP73)			4
ENSRNOG00000018408	CS047_RAT	similar to CG16812-PA			4
ENSRNOG00000018568	Rab5c	RAB5C, member RAS oncogene family	endosome organization; intracellular protein transport; nucleocytoplasmic transport; protein transport; regulation of endocytosis; signal transduction; small GTPase mediated signal transduction	rno04144:Endocytosis	4
ENSRNOG00000018745	Sgsm3	small G protein signaling modulator 3	cell cycle; cell cycle arrest; positive regulation of protein catabolic process; regulation of Rab GTPase activity		4
ENSRNOG00000018764	B3gnt3	UDP-GlcNAc:betaGal beta-1,3-N-acetylglucosaminyltransferase 3	protein amino acid glycosylation	rno00601:Glycosphingolipid biosynthesis	4
ENSRNOG00000019005	Pde8a	phosphodiesterase 8A	cAMP catabolic process; signal transduction; two-component signal transduction system (phosphorelay)	rno00230:Purine metabolism	4
ENSRNOG00000019023	Tars	threonyl-tRNA synthetase	tRNA aminoacylation; tRNA aminoacylation for protein translation; translation	rno00970:Aminoacyl-tRNA biosynthesis	4
ENSRNOG00000019100	Kif2c	kinesin family member 2C	cell cycle; cell division; chromosome segregation; microtubule depolymerization; microtubule-based movement; mitosis		4
ENSRNOG00000019190	Ankrd22	ankyrin repeat domain 22			4
ENSRNOG00000019199	Efcab4a	EF-hand calcium binding domain 4A			4
ENSRNOG00000019240	Ampd2	adenosine monophosphate deaminase 2 (isoform L)	nucleotide metabolic process; purine base metabolic process; purine ribonucleoside monophosphate biosynthetic process	rno00230:Purine metabolism	4
ENSRNOG00000019281	RGD1303130	kidney predominant protein NCU-G1			4
[truncated: 1,415 more rows]
